# Supplementary material for: Enantioselective total synthesis of (+)-cylindricine B
Source: Royal Society of Chemistry journal article supplement (doi:10.1039/d4sc04910a), 2024-01-01

## Supporting Information

# Enantioselective Total Synthesis of (+)-Cylindricine B

Dallas M. Dukes, Victor K. Atanassov, and Joel M. Smith\*

*Department of Chemistry and Biochemistry, Florida State University, 95 Chieftan Way,  
Tallahassee, FL, 32306, USA*

### Corresponding Authors:

E-mail: [jsmith17@fsu.edu](mailto:jsmith17@fsu.edu)

## Table of Contents

|                                                                            |    |
|----------------------------------------------------------------------------|----|
| 1. General Methods .....                                                   | 2  |
| 2. Experimental Procedures and Characterization of Substrates .....        | 3  |
| <i>a. General Procedure for the Preparation of Grignard reagents</i> ..... | 3  |
| <i>b. Initial approach to cylindricine scaffold</i> .....                  | 3  |
| <i>c. Synthesis of multiply-substituted piperidinones</i> .....            | 10 |
| <i>d. Synthesis of cylindricine B</i> .....                                | 19 |
| <i>e. Determination of Enantiomeric Excess of 24</i> .....                 | 30 |
| 3. References .....                                                        | 32 |
| 4. <sup>1</sup> H NMR and <sup>13</sup> C NMR Spectra .....                | 33 |

## 1. General Methods

All reactions were performed using flame-dried round-bottomed flasks or reaction vessels unless otherwise stated. Reactions were carried out under an inert atmosphere of nitrogen with dry solvents, unless otherwise stated. Dry toluene (PhCH<sub>3</sub>), dichloromethane (CH<sub>2</sub>Cl<sub>2</sub>), diethyl ether (Et<sub>2</sub>O), dimethylformamide (DMF), benzene (PhH), and tetrahydrofuran (THF) were obtained by passing the previously degassed solvents through activated alumina columns. Yields refer to chromatographically and spectroscopically (<sup>1</sup>H NMR) homogeneous materials, unless otherwise stated. Reactions were monitored by thin-layer chromatography carried out on Sorbtech silica gel plates (glass-backed, 60G, F-254). TLC plates were visualized using ultraviolet light and an appropriate developing agent. NMR spectra were recorded on a Bruker Avance III 400, 600, or 700 MHz NMR spectrometers and were calibrated using residual solvent as an internal reference (CDCl<sub>3</sub>: <sup>1</sup>H NMR δ = 7.26, <sup>13</sup>C NMR δ = 77.16; C<sub>6</sub>D<sub>6</sub>: <sup>1</sup>H δ = 7.16, <sup>13</sup>C NMR δ = 128.06). The following abbreviations or combinations thereof were used to explain the multiplicities: s = singlet, d = doublet, t = triplet, q = quartet, m = multiplet, and br = broad. Flash column chromatography was performed using Sorbtech silica gel (premium Rf grade, 60A, 40-75μM). High-resolution mass spectra (HRMS) were recorded on an Agilent 6230 TOF-MS spectrometer (ESI). Optical rotations were recorded on a Rudolph Research Analytical Autopolv V polarimeter. Determination of enantiopurity was carried out on a Jasco SFC (supercritical fluid chromatography) using a Daicel ChiralPak IA column. Data for SFC spectra is reported in enantiomeric excess (ee).

## 2. Experimental Procedures and Characterization of Substrates

### a. General Procedure for the Preparation of Grignard reagents

#### General Procedure A for the preparation of Grignard reagents

LiCl (0.210 g, 5 mmol, 1 equiv.) was added to a flask and flame dried under reduced pressure. Once cooled, Mg turnings (0.194 g, 8 mmol, 1.6 equiv.), I<sub>2</sub> (single crystal, catalytic amount), and THF (1 mL) were added. 1 mL of a solution of halide in THF (4 mL) was added and the contents stirred until the disappearance of color (gentle heating may be required). The remaining halide solution was added, and the reaction allowed to stir for 2 h. The resulting Grignard was titrated with I<sub>2</sub>.

### b. Initial approach to cylindricine scaffold

#### Pyridine **15**

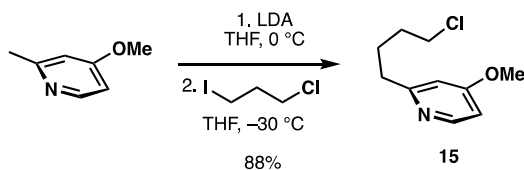

Pyridine **15** is commercially available or can be prepared by the following procedure: To a stirred solution of lithium diisopropylamide, prepared from diisopropylamine (0.7 mL, 4.9 mmol, 1.2 equiv) and n-BuLi (2.3 M in hexanes, 1.9 mL, 4.5 mmol, 1.1 equiv), in THF (13.5 mL, 0.3 M) at 0 °C was added 4-methoxy-2-methylpyridine (0.500 g, 4.1 mmol, 1 equiv) and the solution was allowed to stir for 1 h at 0 °C. The solution was then cooled to -30 °C with an acetonitrile/dry ice bath, and 1-chloro-3-iodopropane (0.53 mL, 4.9 mmol, 1.2 equiv) was added dropwise. The reaction was allowed to stir for 6 h or until the consumption of starting material was observed, as determined by TLC. The reaction was quenched with the addition of water and warmed to room temperature. The product was extracted with EtOAc (3 x 25 mL). The combined organic layers were washed with brine (25 mL), dried with Na<sub>2</sub>SO<sub>4</sub>, filtered, and concentrated under reduced pressure. The crude mixture was purified by flash column chromatography (70% EtOAc/Hexanes) to afford 1.44 g (88% yield) of pyridine **15**.

**Physical State:** Light yellow oil, light yellow solid below room temperature

**R<sub>f</sub>:** 0.33 (80% EtOAc/Hexanes)

**<sup>1</sup>H NMR** (600 MHz, CDCl<sub>3</sub>) δ 8.33 (d, J = 5.7 Hz, 1H), 6.68 – 6.62 (m, 2H), 3.83 (s, 3H), 3.55 (t, J = 6.4 Hz, 2H), 2.76 (t, J = 7.4 Hz, 2H), 1.93 – 1.74 (m, 4H).

### *n*-hexylmagnesium bromide **16**

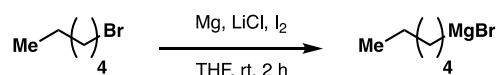

Prepared by General Procedure A

LiCl (0.210 g, 5 mmol, 1 equiv.) was added to a flask and flame dried under reduced pressure. Once cooled, Mg turnings (0.194 g, 8 mmol, 1.6 equiv.), I<sub>2</sub> (single crystal, catalytic amount), and THF (1 mL) were added. 1 mL of a solution of 1-bromohexane in THF (4 mL) was added and the contents stirred until the disappearance of color. The remaining solution was added, and the reaction allowed to stir for 2 h. The Grignard was titrated with I<sub>2</sub> (0.6 M to 0.7 M) and used for the dearomatization of substituted pyridines.

### Piperidenone **17**

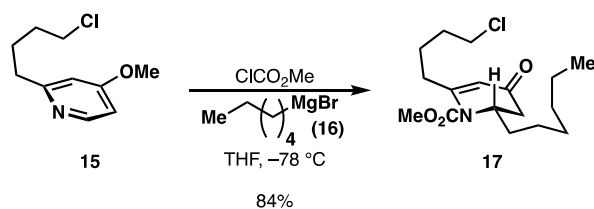

A modified procedure from Harutyunan was employed.<sup>1</sup>

To a flame dried 25 mL round bottom flask was added pyridine **15** (1.17 g, 5.86 mmol, 1 equiv) and THF (20 mL, 0.3 M). Methyl chloroformate (1.4 mL, 17.6 mmol, 3 equiv.) was added dropwise and the solution was stirred for 0.5 h at room temperature. The reaction mixture was then cooled to –78 °C and *n*-hexylmagnesium bromide **16** (25 mL, 0.717 M,

3 equiv.) was added dropwise. The solution was allowed to warm to room temperature overnight. After 16 h, the reaction was quenched with 1M HCl (5 mL) and stirred for 0.25 h. The mixture was then neutralized with the addition of sat. aqueous NaHCO<sub>3</sub>, and extracted with EtOAc (3 x 25 mL). The combined organic layers were washed with brine (25 mL), dried with Na<sub>2</sub>SO<sub>4</sub>, filtered, and concentrated under reduced pressure. The crude mixture was purified by flash column chromatography (20% EtOAc/Hexanes) to afford 1.62 g (84% yield) of piperidenone **17**.

**Physical State:** Light orange oil

**R<sub>f</sub>:** 0.33 (20% EtOAc/Hexanes)

**<sup>1</sup>H NMR** (700 MHz, CDCl<sub>3</sub>) δ 5.42 (s, 1H), 4.75 – 4.66 (m, 1H), 3.83 (s, 3H), 3.54 (td, J = 6.6, 1.3 Hz, 2H), 3.07 (ddd, J = 14.8, 9.2, 5.8 Hz, 1H), 2.78 (dd, J = 17.0, 6.0 Hz, 1H), 2.43 – 2.26 (m, 2H), 1.81 (tt, J = 8.1, 4.1 Hz, 2H), 1.72 (ddq, J = 13.5, 10.0, 5.0 Hz, 1H), 1.66 – 1.59 (m, 2H), 1.55 – 1.48 (m, 1H), 1.38 – 1.18 (m, 8H), 0.87 (t, J = 7.1 Hz, 3H).

**<sup>13</sup>C NMR** (176 MHz, CDCl<sub>3</sub>) δ 193.8, 157.8, 154.1, 112.9, 56.5, 53.8, 44.5, 41.3, 35.2, 32.2, 31.8, 30.4, 29.1, 26.3, 25.5, 22.7, 14.2.

**HRMS (ESI) m/z:** [M+H]<sup>+</sup> calc'd for C<sub>17</sub>H<sub>29</sub>ClNO<sub>3</sub><sup>+</sup> 330.1830; found 330.1835

### Butenylmagnesium bromide **18**

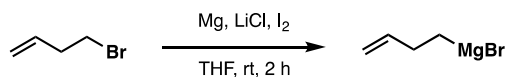

Prepared by General Procedure A

LiCl (0.210 g, 5 mmol, 1 equiv.) was added to a flask and flame dried under reduced pressure. Once cooled, Mg turnings (0.194 g, 8 mmol, 1.6 equiv.), I<sub>2</sub> (single crystal, catalytic amount), and THF (1 mL) were added. 1 mL of a solution of 4-bromo-1-butene in THF (4 mL) was added and the contents stirred until the disappearance of color. The remaining solution was added, and the reaction allowed to stir for 2 h. The grignard was titrated with I<sub>2</sub> (0.6 M to 0.8 M).

## Chloropiperdinone 19a

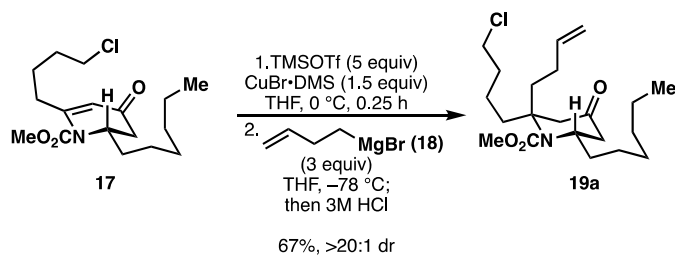

To a flame dried 25 mL round bottom flask was added CuBr·DMS (0.93 g, 4.5 mmol, 1.5 equiv.) followed by piperdenone **17** (1.0 g, 3.0 mmol, 1 equiv.) and THF (15 mL, 0.2 M). The reaction mixture was cooled to 0 °C and TMSOTf (2.7 mL, 15 mmol, 5 equiv.) was added dropwise. The resultant solution was stirred for 0.25 h at 0 °C then cooled to -78 °C. Butenylmagnesium bromide **18** (12 mL, 0.75 M, 3 equiv.), prepared by General Procedure A, was added to the reaction flask via a syringe pump over one hour. Once the syringe pump addition is complete, the reaction was allowed to stir at -78 °C until the consumption of starting material was observed, as determined by TLC. The reaction was quenched with a 1:1 solution of sat. aqueous NH<sub>4</sub>Cl and aqueous NH<sub>4</sub>OH (15 mL) and warmed to room temperature. The product was extracted with EtOAc (3 x 50 mL) and the combined organic layer stirred with 1 M HCl for 0.25 h. After 0.25 h, the solution was neutralized with the addition of K<sub>2</sub>CO<sub>3</sub>. The layers were separated and the organic layer washed with water (50 mL), brine (50 mL), dried with Na<sub>2</sub>SO<sub>4</sub>, filtered, and concentrated under reduced pressure. The crude mixture was purified by flash column chromatography (10% EtOAc/Hexanes) to afford 0.78 g (67% yield) of chloropiperidinone **19a**.

**Physical State:** Light yellow oil

**R<sub>f</sub>:** 0.5 (20% EtOAc/Hexanes)

**<sup>1</sup>H NMR** (700 MHz, CDCl<sub>3</sub>) δ 5.73 – 5.64 (m, 1H), 4.96 (d, J = 17.1 Hz, 1H), 4.91 (d, J = 10.1 Hz, 1H), 4.43 (s, 1H), 3.69 (s, 3H), 3.56 – 3.49 (m, 2H), 2.85 (d, J = 17.3 Hz, 1H), 2.63 (dd, 1H), 2.47 (d, 1H), 2.44 – 2.34 (m, 2H), 2.11 (s, 1H), 1.97 – 1.88 (m, 2H), 1.79 – 1.68 (m, 4H), 1.46 – 1.35 (m, 2H), 1.34 – 1.17 (m, 10H), 0.86 (t, J = 7.0 Hz, 3H).

**<sup>13</sup>C NMR** (176 MHz, CDCl<sub>3</sub>) δ 208.7, 137.7, 115.2, 61.2, 52.5, 52.2, 46.9, 44.9, 41.6, 39.4, 37.6, 37.5, 32.5, 31.8, 29.1, 29.0, 27.1, 22.7, 21.5, 14.2.

**HRMS (ESI) m/z:** [M+Na]<sup>+</sup> calc'd for C<sub>21</sub>H<sub>36</sub>ClNO<sub>3</sub>Na<sup>+</sup> 408.2276; found 408.2300.

### Iodopiperidinone **20**

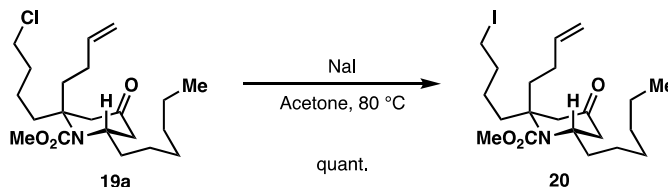

To a sealed tube was added chloropiperidinone **19a** (0.320 g, 0.83 mmol, 1 equiv.), sodium iodide (1.2 g, 8.3 mmol, 10 equiv.), and acetone (3 mL, 0.3 M). The reaction flask was heated to 80 °C and stirred for 16 h or until consumption of starting material was observed, as determined by <sup>1</sup>H NMR. The reaction was cooled to room temperature then poured into water. The product was extracted with EtOAc (3 x 10 mL) and the combined organic layer washed with brine (15 mL), dried with Na<sub>2</sub>SO<sub>4</sub>, filtered, and concentrated under reduced pressure. The crude mixture was used without any further purification.

**Physical State:** Light orange oil

**R<sub>f</sub>:** 0.5 (20% EtOAc/Hexanes)

**<sup>1</sup>H NMR** (600 MHz, CDCl<sub>3</sub>) δ 5.70 (ddt, J = 16.7, 10.1, 6.5 Hz, 1H), 4.98 (dd, J = 17.1, 1.5 Hz, 1H), 4.93 (d, J = 10.1 Hz, 1H), 4.44 (s, 1H), 3.71 (s, 3H), 3.21 (tq, J = 6.3, 2.9 Hz, 2H), 2.87 (d, J = 17.2 Hz, 1H), 2.69 – 2.61 (m, 1H), 2.53 – 2.44 (m, 1H), 2.39 (d, J = 17.3 Hz, 2H), 2.12 (s, 1H), 1.94 (dt, J = 10.6, 5.2 Hz, 2H), 1.86 – 1.70 (m, 4H), 1.44 (dt, J = 13.6, 8.1 Hz, 1H), 1.33 – 1.22 (m, 11H), 0.88 (t, J = 6.9 Hz, 3H).

### Azadecalinone **21a**



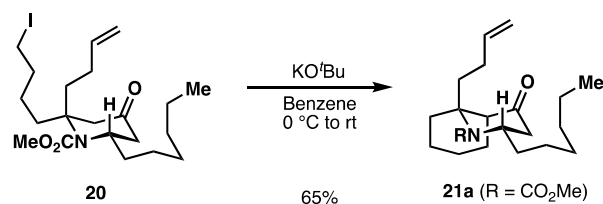

A modified procedure from Padwa was employed.<sup>2</sup>

To a 50 mL round bottom flask was added iodopiperdinone **20** (0.200 g, 0.42 mmol, 1 equiv.) and benzene (21 mL, 0.02 M). The solution was cooled to 0 °C and a 0.5 M solution of <sup>t</sup>BuOK (0.188 g, 1.68 mmol, 4 equiv.) in THF (3 mL) was added via syringe pump over one hour. After the addition was completed, the reaction solution was allowed to warm to room temperature and stirred until consumption of starting material was observed, as determined by TLC. The reaction was quenched with 0.1 M HCl (10 mL) and the product extracted with EtOAc (3 x 25 mL). The combined organic layers were washed with water (25 mL), brine (25 mL), dried with Na<sub>2</sub>SO<sub>4</sub>, filtered, and concentrated under reduced pressure. The crude mixture was purified by flash column chromatography (5% EtOAc/Hexanes) to afford 0.081 g (60% yield) of azadecalinone **21a**.

**Physical State:** Light yellow oil

**R<sub>f</sub>:** 0.57 (20% EtOAc/Hexanes)

**<sup>1</sup>H NMR** (600 MHz, CDCl<sub>3</sub>) δ 5.70 (dt, J = 16.7, 8.6 Hz, 1H), 4.95 (d, J = 17.1 Hz, 1H), 4.90 (d, J = 10.0 Hz, 1H), 4.44 (s, 1H), 3.70 (s, 3H), 3.04 (d, J = 10.9 Hz, 1H), 2.78 (d, J = 9.9 Hz, 1H), 2.70 (dd, 1H), 2.46 (d, 1H), 2.26 – 2.17 (m, 1H), 2.06 (d, J = 14.0 Hz, 1H), 1.94 – 1.87 (m, 1H), 1.86 – 1.78 (m, 2H), 1.73 (t, J = 11.5 Hz, 2H), 1.68 – 1.57 (m, 2H), 1.52 – 1.38 (m, 2H), 1.41 – 1.33 (m, 2H), 1.35 – 1.18 (m, 8H), 0.88 (t, J = 6.4 Hz, 3H).

**<sup>13</sup>C NMR** (151 MHz, CDCl<sub>3</sub>) δ 209.3, 138.4, 114.8, 63.1, 54.7, 52.3, 52.2, 41.4, 39.5, 39.1, 31.9, 31.5, 29.2, 29.1, 27.7, 25.0, 22.7, 22.5, 20.8, 14.2.

**HRMS (ESI) m/z:** [M+Na]<sup>+</sup> calc'd for C<sub>21</sub>H<sub>35</sub>NO<sub>3</sub>Na<sup>+</sup> 372.2509; found 327.2540

**Aminoketone 22a**

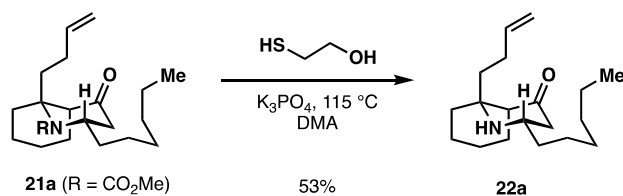

A modified procedure from Chen was employed.<sup>3</sup>

To a sealed tube was added azadecalinone **21a** (0.075 g, 0.22 mmol, 1 equiv.), potassium phosphate tribasic (0.182 g, 0.86 mmol, 4 equiv.), 2-mercaptoethanol (0.03 mL, 0.43 mmol, 2 equiv.), and DMA (0.86 mL, 0.25 M). The reaction mixture was heated to 115 °C for 16 h or until consumption of starting material was observed, as determined by TLC. The reaction was cooled to room temperature then poured into water (5 mL). The product was extracted with EtOAc (3 x 5 mL) and washed with water (2 x 10 mL), then brine (2 x 10 mL), dried with Na<sub>2</sub>SO<sub>4</sub>, filtered, and concentrated under reduced pressure. The crude mixture was purified by flash column chromatography (10% EtOAc/Hexanes) to afford 0.033 g (53% yield) of aminoketone **22a**.

**Physical State:** Light yellow oil

**R<sub>f</sub>:** 0.47 (10% EtOAc/Hexanes)

**<sup>1</sup>H NMR** (400 MHz, CDCl<sub>3</sub>) δ 5.77 (ddt, J = 16.8, 10.1, 6.6 Hz, 1H), 4.98 (dd, J = 17.1, 1.6 Hz, 1H), 4.94 – 4.88 (m, 1H), 2.94 (dq, J = 10.6, 6.1 Hz, 1H), 2.20 (dd, J = 14.5, 11.1 Hz, 1H), 2.12 (dd, J = 14.5, 3.5 Hz, 1H), 2.06 (dd, J = 12.3, 4.2 Hz, 1H), 2.04 – 1.99 (m, 1H), 1.91 (qd, J = 12.1, 5.4 Hz, 1H), 1.85 – 1.71 (m, 3H), 1.63 – 1.50 (m, 4H), 1.49 – 1.41 (m, 2H), 1.37 (dq, J = 15.0, 6.7 Hz, 1H), 1.33 – 1.25 (m, 8H), 1.22 – 1.12 (m, 3H), 0.88 (t, J = 7.0 Hz, 3H).

**<sup>13</sup>C NMR** (176 MHz, CDCl<sub>3</sub>) δ 214.7, 138.7, 114.6, 58.3, 55.0, 50.6, 44.2, 38.1, 37.7, 35.8, 31.9, 29.5, 27.1, 26.5, 25.8, 25.5, 22.8, 21.0, 14.2.

**HRMS (ESI) m/z:** [M+H]<sup>+</sup> calc'd for C<sub>19</sub>H<sub>34</sub>NO<sup>+</sup> 292.2635; found 292.2646

Table S1: Aminoketone <sup>1</sup>H NMR Chemical Shift Comparison

| Snider (300 MHz, CDCl <sub>3</sub> ) | Aminoketone 22a (400 MHz, CDCl <sub>3</sub> ) |
|--------------------------------------|-----------------------------------------------|
|--------------------------------------|-----------------------------------------------|

|                                            |                                                                                                                                     |
|--------------------------------------------|-------------------------------------------------------------------------------------------------------------------------------------|
| 5.87 (ddt, J=16.9, 10.2, 6.6 Hz, 1H)       | 5.77 (ddt, 16.8, 10.1, 6.6 Hz, 1H)                                                                                                  |
| 5.07 (br d, J=16.9 Hz, 1H)                 | 4.98, (dd, J=17.1, 1.6, 1H)                                                                                                         |
| 4.99 (bd d, J=10.2 Hz, 1H)                 | 4.94–4.88 (m, 1H)                                                                                                                   |
| 3.12 (dddd, J= 11.5, 2.7, 6.0, 6.0 Hz, 1H) | 2.94 (dq, J=10.6, 6.1 Hz, 1H)                                                                                                       |
| 2.37 (dd, J=13.5, 2.7, 1H)                 | 2.20 (dd, J=14.5, 11.1 Hz, 1H)                                                                                                      |
| 2.25 (dd, J=4.0, 4.0 Hz, 1H)               | 2.12 (dd, J=14.5, 3.5 Hz, 1H)                                                                                                       |
| 2.21–2.05 (m, 2H)                          | 2.06 (dd, J=12.3, 4.2 Hz, 1H), 2.04–1.99 (m, 1H)                                                                                    |
| 1.96 (dd, J=13.5, 11.5 Hz, 1H)             | 1.91 (qd, J=12.1, 5.4 Hz, 1H)                                                                                                       |
| 1.87–1.20 (m, 20H)                         | 1.85–1.71 (m, 1H), 1.63–1.50 (m, 4H), 1.49–1.41 (m, 2H),<br>1.37 (dq, J=15.0, 6.7 Hz, 1H), 1.33–1.25 (m, 8H), 1.22–<br>1.12 (m, 3H) |
| 0.88 (t, J=6.5 Hz, 3H)                     | 0.88 (t, J=7.0, 3H)                                                                                                                 |

### c. Synthesis of multiply-substituted piperidinones

#### General procedure B for the Grignard addition to piperdenones

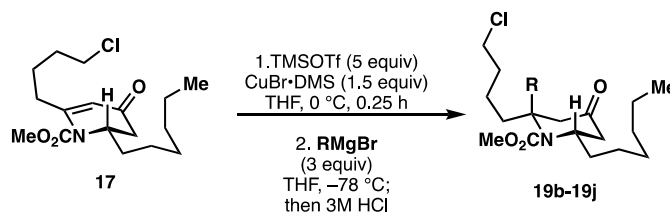

To a flame dried 25 mL round bottom flask was added CuBr·DMS (1.5 equiv.) followed by piperidenone **17** (1 equiv.) and THF (0.2 M). The reaction mixture was cooled to 0 °C and TMSOTf (5 equiv.) was added dropwise. The resultant solution was stirred for 0.25 h at 0 °C then cooled to -78 °C. The Grignard solution (3 equiv.) was added to the reaction flask via a syringe pump over one hour. Once the syringe pump addition is complete, the reaction was allowed to stir at -78 °C until the consumption of starting material was observed, as determined by TLC. The reaction was quenched with a 1:1 solution of sat. aqueous NH<sub>4</sub>Cl and aqueous NH<sub>4</sub>OH (15 mL) and warmed to room temperature. The product was extracted with EtOAc (3 x 50 mL) and the combined organic layer stirred with 1 M HCl for 0.25 h. After 0.25 h, the solution was neutralized with the addition of K<sub>2</sub>CO<sub>3</sub>. The layers were separated and the organic layer washed with water (25 mL), brine (25 mL), dried with Na<sub>2</sub>SO<sub>4</sub>, filtered, and concentrated under reduced pressure. The crude mixture was purified by flash column chromatography.

## Piperidone **19b**

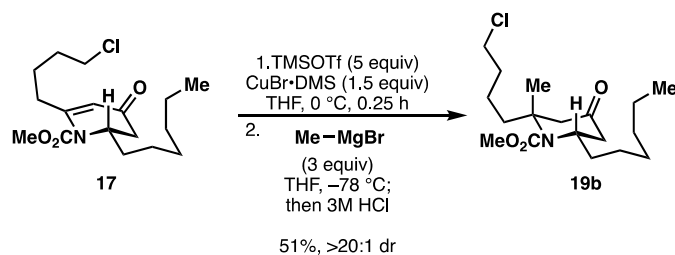

Piperidone **19b** was synthesized according to general procedure B using CuBr·DMS (0.047 g, 0.228 mmol, 1.5 equiv.), piperdenone **17** (0.05 g, 0.152 mmol, 1.0 equiv.), TMSOTf (0.14 mL, 0.758 mmol, 5.0 equiv.), THF (0.8 mL, 0.2 M), and methylmagnesium bromide (0.28 mL, 1.66 M, 3 equiv.). Following addition of the Grignard reagent, the reaction was complete in 1 h. Purification via flash chromatography (10% EtOAc/Hexanes) afforded the pure product **19b** (0.026 g, 51% yield).

**Physical State:** Light yellow oil

**R<sub>f</sub>:** 0.37 (15% EtOAc/Hexanes)

**<sup>1</sup>H NMR** (600 MHz, CDCl<sub>3</sub>) δ 4.42 (s, 1H), 3.70 (s, 3H), 3.54 (tq, *J* = 8.1, 4.2 Hz, 2H), 2.96 (d, *J* = 17.1 Hz, 1H), 2.67 – 2.59 (m, 1H), 2.52 – 2.45 (m, 2H), 2.15 (d, *J* = 17.1 Hz, 1H), 1.82 – 1.72 (m, 2H), 1.71 – 1.65 (m, 1H), 1.46 – 1.32 (m, 5H), 1.30 – 1.23 (m, 10H), 0.87 (t, *J* = 6.9 Hz, 3H).

**<sup>13</sup>C NMR** (176 MHz, CDCl<sub>3</sub>) δ 208.7, 58.3, 52.4, 52.3, 50.1, 44.9, 41.6, 39.5, 37.5, 32.4, 31.8, 29.8, 29.1, 27.5, 27.0, 22.7, 21.6, 14.2.

**HRMS (ESI) m/z:** [M+H]<sup>+</sup> calc'd for C<sub>18</sub>H<sub>33</sub>ClNO<sub>3</sub><sup>+</sup> 346.2143; found 346.2146

## Piperidone **19c**

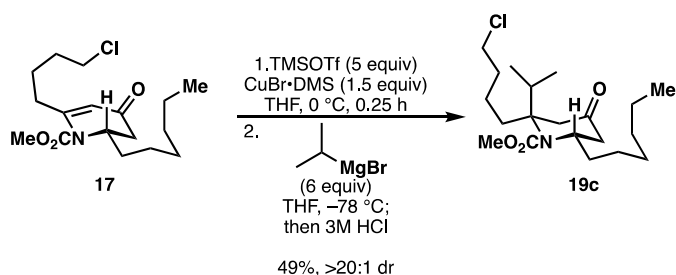

Piperidone **19c** was synthesized according to general procedure B using CuBr·DMS (0.047 g, 0.228 mmol, 1.5 equiv.), piperdenone **17** (0.05 g, 0.152 mmol, 1.0 equiv.), TMSOTf (0.14 mL, 0.758 mmol, 5.0 equiv.), THF (0.8 mL, 0.2 M), and Isopropylmagnesium chloride lithium chloride complex (0.75 mL, 1.21 M, 6 equiv.). Following addition of the Grignard reagent, the reaction was complete in 1 h. Purification via flash chromatography (10% EtOAc/Hexanes) afforded the pure product **19c** (0.028 g, 49% yield).

**Physical State:** Light yellow oil

**R<sub>f</sub>:** 0.30 (10% EtOAc/Hexanes)

**<sup>1</sup>H NMR** (700 MHz, CDCl<sub>3</sub>) δ 4.47 (s, 1H), 3.70 (s, 2H), 3.55 (tq, J = 17.2, 9.1 Hz, 3H), 2.77 – 2.70 (m, 2H), 2.62 (d, J = 17.2 Hz, 1H), 2.46 – 2.40 (m, 3H), 1.82 – 1.72 (m, 2H), 1.47 – 1.36 (m, 2H), 1.36 – 1.20 (m, 11H), 0.90 (d, J = 7.0 Hz, 3H), 0.88 (t, J = 6.7 Hz, 3H), 0.81 (d, J = 7.1 Hz, 3H).

**<sup>13</sup>C NMR** (176 MHz, CDCl<sub>3</sub>) δ 209.7, 65.3, 52.5, 52.2, 45.0, 43.0, 40.9, 38.1, 32.5, 31.9, 29.0, 27.4, 22.7, 22.2, 19.8, 17.8, 14.2.

**HRMS (ESI) m/z:** [M+H]<sup>+</sup> calc'd for C<sub>20</sub>H<sub>37</sub>ClNO<sub>3</sub><sup>+</sup> 374.2456; found 374.2454

**Piperidone 19d**

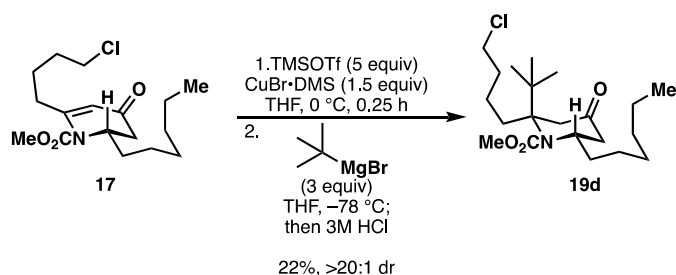

Piperidone **19d** was synthesized according to general procedure B using CuBr·DMS (0.047 g, 0.228 mmol, 1.5 equiv.), piperdenone **17** (0.05 g, 0.152 mmol, 1.0 equiv.), TMSOTf (0.14 mL, 0.758 mmol, 5.0 equiv.), THF (0.8 mL, 0.2 M), and tert-butylmagnesium chloride (0.5 mL, 0.917 M, 3 equiv.). Following addition of the Grignard reagent, the reaction was complete in 1 h. Purification via flash chromatography (5% EtOAc/Hexanes) afforded the pure product **19d** (0.013 g, 22% yield).

**Physical State:** Light yellow oil

**R<sub>f</sub>:** 0.30 (10% EtOAc/Hexanes)

**<sup>1</sup>H NMR** (600 MHz, CDCl<sub>3</sub>) δ 4.34 (td, J = 6.8, 3.2 Hz, 1H), 3.67 (s, 3H), 3.55 (t, J = 6.5 Hz, 2H), 2.84 – 2.76 (m, 2H), 2.62 (q, J = 17.2 Hz, 2H), 2.49 – 2.43 (m, 1H), 1.84 – 1.71 (m, 3H), 1.52 – 1.33 (m, 2H), 1.31 – 1.18 (m, 11H), 1.00 (s, 9H), 0.88 (t, J = 6.9 Hz, 2H).

**<sup>13</sup>C NMR** (151 MHz, CDCl<sub>3</sub>) δ 210.8, 157.1, 68.4, 53.8, 52.4, 46.4, 45.1, 42.1, 41.1, 38.1, 34.3, 32.7, 31.9, 29.1, 28.6, 27.6, 22.7, 22.3, 14.2.

**HRMS (ESI) m/z:** [M+H]<sup>+</sup> calc'd for C<sub>21</sub>H<sub>39</sub>ClNO<sub>3</sub><sup>+</sup> 388.2613; found 388.2597

### Piperidone 19e

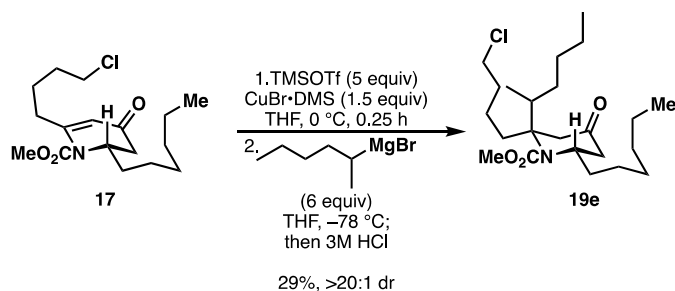

Piperidone **19e** was synthesized according to general procedure B using CuBr·DMS (0.047 g, 0.228 mmol, 1.5 equiv.), piperdenone **17** (0.05 g, 0.152 mmol, 1.0 equiv.), TMSOTf (0.14 mL, 0.758 mmol, 5.0 equiv.), THF (0.8 mL, 0.2 M), and 2-hexanymagnesium bromide (0.5 mL, 0.430 M, 6 equiv.), prepared following general procedure A. Following addition of the Grignard reagent, the reaction was complete in 1 h. Purification via flash chromatography (5% EtOAc/Hexanes) afforded the pure product **19e** (0.018 g, 29% yield).

**Physical State:** Light yellow oil

**R<sub>f</sub>:** 0.40 (10% EtOAc/Hexanes)

**<sup>1</sup>H NMR** (600 MHz, CDCl<sub>3</sub>) δ 4.48 (s, 1H), 3.70 (s, 3H), 3.60 – 3.50 (m, 2H), 2.78 – 2.68 (m, 1H), 2.67 – 2.59 (m, 1H), 2.55 – 2.33 (m, 3H), 1.82 – 1.74 (m, 3H), 1.51 – 1.19 (m, 17H), 1.16 (d, J = 10.0 Hz, 1H), 1.09 – 0.99 (m, 1H), 0.87 (dt, J = 11.9, 5.9 Hz, 6H), 0.79 (d, J = 7.0 Hz, 3H).

Overlay of spectrum displays an approximate diastereomeric ratio of 2.3:1 about the methyl center.

**<sup>13</sup>C NMR** (176 MHz, CDCl<sub>3</sub>) δ 209.8, 65.7, 52.6, 45.0, 43.8, 41.0, 38.3, 32.7, 32.6, 31.9, 31.7, 31.1, 30.5, 29.9, 29.1, 27.4, 23.1, 22.7, 22.2, 22.1, 16.6, 14.2, 14.2.

**HRMS (ESI) m/z:** [M+H]<sup>+</sup> calc'd for C<sub>23</sub>H<sub>43</sub>ClNO<sub>3</sub><sup>+</sup> 416.2926; found 416.2904

### Piperidone **19f**

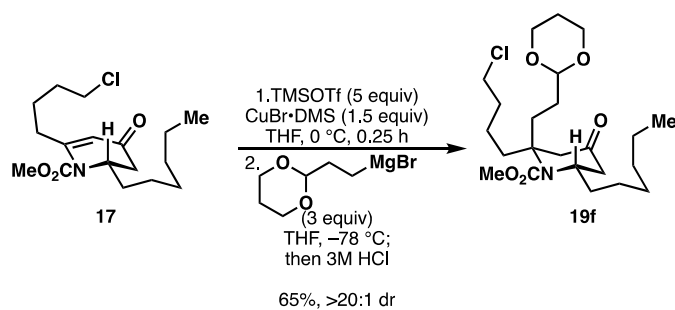

Piperidone **19f** was synthesized according to general procedure B using CuBr·DMS (0.047 g, 0.228 mmol, 1.5 equiv.), piperdenone **17** (0.05 g, 0.152 mmol, 1.0 equiv.), TMSOTf (0.14 mL, 0.758 mmol, 5.0 equiv.), THF (0.8 mL, 0.2 M), and (2-(1,3-dioxan-2-yl)ethyl)magnesium bromide (0.46 mL, 1.0 M, 3 equiv.), prepared following general procedure A. Following addition of the Grignard reagent, the reaction was complete in 1 h. Purification via flash chromatography (40% EtOAc/Hexanes) afforded the pure product **19f** (0.044 g, 65% yield).

**Physical State:** Light yellow oil

**R<sub>f</sub>:** 0.40 (40% EtOAc/Hexanes)

**<sup>1</sup>H NMR** (600 MHz, CDCl<sub>3</sub>) δ 4.41 (t, J = 5.0 Hz, 2H), 4.07 – 4.00 (m, 2H), 3.76 – 3.59 (m, 5H), 3.53 (tq, J = 8.5, 4.3 Hz, 2H), 2.82 (d, J = 17.4 Hz, 1H), 2.69 – 2.62 (m, 1H), 2.50 – 2.43 (m, 1H), 2.39 (s, 1H), 2.33 (d, J = 17.4 Hz, 1H), 1.83 – 1.63 (m, 5H), 1.54 – 1.44 (m, 2H), 1.46 – 1.30 (m, 2H), 1.34 – 1.20 (m, 10H), 0.87 (t, J = 7.0 Hz, 3H).

**<sup>13</sup>C NMR** (176 MHz, CDCl<sub>3</sub>) δ 208.5, 102.1, 67.0, 66.9, 60.9, 52.5, 52.2, 46.7, 44.9, 41.5, 37.5, 34.2, 32.5, 31.9, 30.4, 29.8, 29.1, 27.1, 25.8, 22.7, 21.4, 14.2.

**HRMS (ESI) m/z:** [M+H]<sup>+</sup> calc'd for C<sub>23</sub>H<sub>41</sub>CINO<sub>5</sub><sup>+</sup> 446.2668; found 446.2666

### Piperidone **19g**

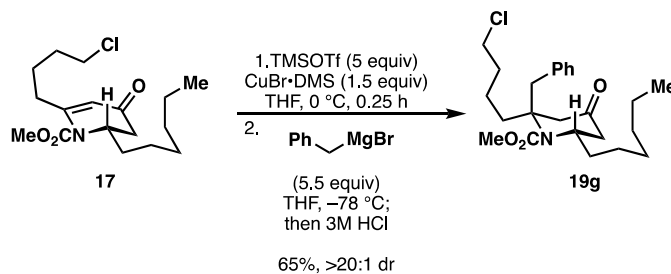

Piperidone **19g** was synthesized according to general procedure B using CuBr·DMS (0.047 g, 0.228 mmol, 1.5 equiv.), piperdenone **17** (0.05 g, 0.152 mmol, 1.0 equiv.), TMSOTf (0.14 mL, 0.758 mmol, 5.0 equiv.), THF (0.8 mL, 0.2 M), and benzylmagnesium bromide (4.7 mL, 0.177 M, 5.5 equiv.), prepared following general procedure A. Following



addition of the Grignard reagent, the reaction was complete in 1 h. Purification via flash chromatography (10% EtOAc/Hexanes) afforded the pure product **19g** (0.083 g, 65% yield).

**Physical State:** Light yellow oil

**R<sub>f</sub>:** 0.30 (10% EtOAc/Hexanes)

**<sup>1</sup>H NMR** (600 MHz, CDCl<sub>3</sub>) δ 7.32 – 7.16 (m, 3H), 7.08 – 7.01 (m, 2H), 4.24 (s, 1H), 3.80 (s, 3H), 3.61 – 3.46 (m, 2H), 3.45 (d, J = 10.8 Hz, 1H), 2.90 (d, J = 13.3 Hz, 1H), 2.76 (d, J = 17.9 Hz, 1H), 2.57 (s, 1H), 2.44 (d, J = 17.9 Hz, 1H), 2.12 – 2.06 (m, 1H), 1.77 (tp, J = 14.0, 7.1 Hz, 3H), 1.65 (dt, J = 13.2, 6.4 Hz, 1H), 1.43 – 1.14 (m, 12H), 0.86 (t, J = 7.1 Hz, 3H).

**<sup>13</sup>C NMR** (151 MHz, CDCl<sub>3</sub>) δ 208.6, 137.0, 131.1, 128.5, 127.2, 62.0, 52.7, 52.1, 47.3, 44.9, 41.0, 37.5, 32.4, 31.8, 29.0, 27.0, 22.7, 21.3, 14.2.

**HRMS (ESI) m/z:** [M+H]<sup>+</sup> calc'd for C<sub>24</sub>H<sub>36</sub>ClNO<sub>3</sub>Na<sup>+</sup> 444.2276; found 444.2303

### Piperidone **19h**

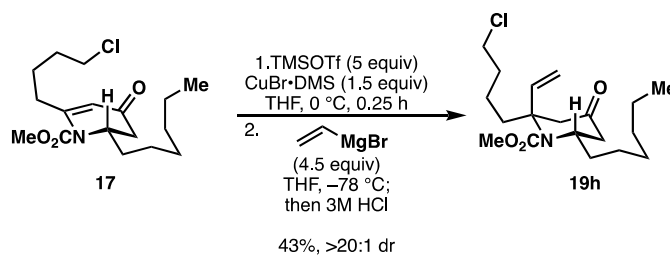

Piperidone **19h** was synthesized according to general procedure B using CuBr·DMS (0.047 g, 0.228 mmol, 1.5 equiv.), piperdenone **17** (0.05 g, 0.152 mmol, 1.0 equiv.), TMSOTf (0.14 mL, 0.758 mmol, 5.0 equiv.), THF (0.8 mL, 0.2 M), and vinylmagnesium bromide (1.06 mL, 0.66 M, 4.5 equiv.). Following addition of the Grignard reagent, the reaction was complete in 1 h. Purification via flash chromatography (15% EtOAc/Hexanes) afforded the pure product **19h** (0.024 g, 43% yield).

**Physical State:** Light yellow oil

**R<sub>f</sub>**: 0.33 (15% EtOAc/Hexanes)

**<sup>1</sup>H NMR** (700 MHz, CDCl<sub>3</sub>) δ 6.04 (dd, J = 17.4, 10.9 Hz, 1H), 5.06 (d, J = 10.8 Hz, 1H), 4.95 (d, J = 17.5 Hz, 1H), 4.47 (s, 1H), 3.71 (s, 3H), 3.55 (tq, J = 8.3, 4.3 Hz, 2H), 2.97 (d, J = 17.5 Hz, 1H), 2.64 (dd, 1H), 2.57 (t, J = 11.1 Hz, 1H), 2.48 – 2.41 (m, 2H), 1.83 – 1.76 (m, 2H), 1.77 – 1.67 (m, 1H), 1.44 – 1.36 (m, 4H), 1.31 – 1.21 (m, 8H), 0.88 (t, J = 7.0 Hz, 3H).

**<sup>13</sup>C NMR** (176 MHz, CDCl<sub>3</sub>) δ 208.0, 142.1, 113.1, 62.0, 52.8, 52.6, 47.4, 44.8, 41.7, 38.4, 37.6, 32.4, 31.9, 29.9, 29.1, 27.0, 22.7, 21.2, 14.2.

**HRMS (ESI) m/z**: [M+H]<sup>+</sup> calc'd for C<sub>19</sub>H<sub>33</sub>ClNO<sub>3</sub><sup>+</sup> 358.2143; found 358.2136

### Piperidone **19i**

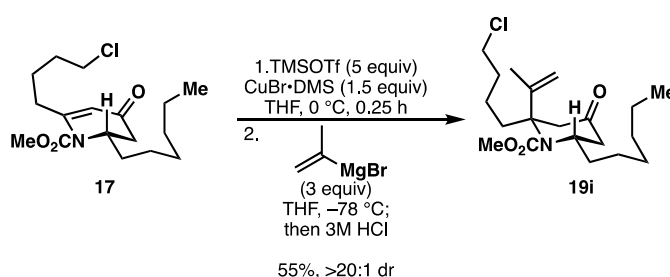

Piperidone **19i** was synthesized according to general procedure B using CuBr·DMS (0.047 g, 0.228 mmol, 1.5 equiv.), piperdenone **17** (0.05 g, 0.152 mmol, 1.0 equiv.), TMSOTf (0.14 mL, 0.758 mmol, 5.0 equiv.), THF (0.8 mL, 0.2 M), and isopropenylmagnesium bromide (1.3 mL, 0.35 M, 3 equiv.). Following addition of the Grignard reagent, the reaction was complete in 1 h. Purification via flash chromatography (25% EtOAc/Hexanes) afforded the pure product **19i** (0.031 g, 55% yield).

**Physical State**: Light yellow oil

**R<sub>f</sub>**: 0.60 (30% EtOAc/Hexanes)

**<sup>1</sup>H NMR** (600 MHz, CDCl<sub>3</sub>) δ 4.90 (s, 1H), 4.73 (s, 1H), 4.49 (s, 1H), 3.69 (s, 3H), 3.61 – 3.51 (m, 2H), 2.96 (d, J = 17.1 Hz, 1H), 2.78 – 2.70 (m, 1H), 2.61 (s, 1H), 2.50 (d, J =

17.1 Hz, 1H), 2.43 – 2.37 (m, 1H), 1.79 (tq,  $J = 14.3, 6.9$  Hz, 3H), 1.73 (s, 3H), 1.48 – 1.36 (m, 3H), 1.36 – 1.12 (m, 9H), 0.88 (t,  $J = 6.9$  Hz, 3H).

$^{13}\text{C}$  NMR (176 MHz,  $\text{CDCl}_3$ )  $\delta$  208.1, 146.7, 112.1, 65.2, 52.7, 52.7, 47.1, 44.9, 40.3, 37.9, 37.0, 32.4, 31.9, 29.8, 29.1, 27.1, 22.7, 21.5, 19.3, 14.2.

HRMS (ESI)  $m/z$ :  $[\text{M}+\text{H}]^+$  calc'd for  $\text{C}_{20}\text{H}_{35}\text{ClNO}_3^+$  372.2300; found 372.2301

### Piperidone 19j

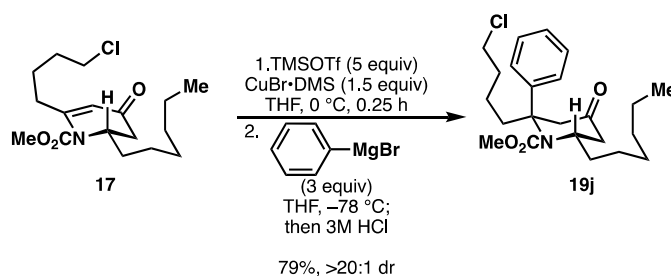

Piperidone **19j** was synthesized according to general procedure B using CuBr·DMS (0.047 g, 0.228 mmol, 1.5 equiv.), piperdenone **17** (0.05 g, 0.152 mmol, 1.0 equiv.), TMSOTf (0.14 mL, 0.758 mmol, 5.0 equiv.), THF (0.8 mL, 0.2 M), and phenylmagnesium bromide (0.17 mL, 2.76 M, 3 equiv.). Following addition of the Grignard reagent, the reaction was complete in 1 h. Purification via flash chromatography (15 % EtOAc/Hexanes) afforded the pure product **19j** (0.049 g, 79% yield).

**Physical State:** Light yellow oil

**R<sub>f</sub>:** 0.33 (15% EtOAc/Hexanes)

$^1\text{H}$  NMR (600 MHz,  $\text{CDCl}_3$ )  $\delta$  7.29 (t,  $J = 7.7$  Hz, 2H), 7.19 (t,  $J = 7.3$  Hz, 1H), 7.14 (d,  $J = 7.5$  Hz, 2H), 4.63 (s, 1H), 3.69 (s, 3H), 3.63 – 3.52 (m, 2H), 3.24 (d,  $J = 17.3$  Hz, 1H), 2.76 (s, 1H), 2.68 (d,  $J = 17.3$  Hz, 1H), 2.59 – 2.51 (m, 1H), 2.46 – 2.39 (m, 1H), 1.89 (dd,  $J = 12.8, 4.5$  Hz, 1H), 1.85 – 1.75 (m, 3H), 1.58 (tq,  $J = 12.2, 7.3$  Hz, 1H), 1.51 – 1.40 (m, 2H), 1.40 – 1.23 (m, 8H), 0.89 (t,  $J = 6.9$  Hz, 3H).

$^{13}\text{C}$  NMR (176 MHz,  $\text{CDCl}_3$ )  $\delta$  207.5, 145.4, 128.7, 127.1, 125.3, 64.2, 53.2, 52.8, 51.5, 44.8, 41.4, 40.8, 37.7, 32.4, 31.9, 29.1, 27.0, 22.7, 21.8, 14.2.

**HRMS (ESI) m/z:** [M+H]<sup>+</sup> calc'd for C<sub>23</sub>H<sub>35</sub>ClNO<sub>3</sub><sup>+</sup> 408.2300; found 408.2296

#### d. Synthesis of cylindricine B

##### Pyridine 23

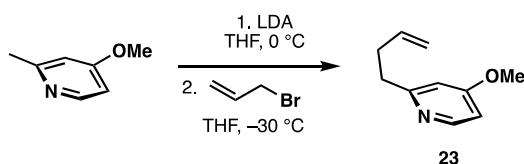

Pyridine **23** is commercially available or can be prepared by the following procedure: To a stirred solution of lithium diisopropylamide, prepared from diisopropylamine (4 mL, 29 mmol, 1.2 equiv) and n-BuLi (2.3 M in hexanes, 11 mL, 27 mmol, 1.1 equiv), in THF (81 mL, 0.3 M) at 0 °C was added 4-methoxy-2-methylpyridine (3.0 g, 24 mmol, 1 equiv) and the solution was allowed to stir for 1 h at 0 °C. The solution was then cooled to -30 °C with an acetonitrile/dry ice bath, and allyl bromide (2.5 mL, 29 mmol, 1.2 equiv) was added dropwise. The reaction was allowed to stir for 6 h or until the consumption of starting material was observed, as determined by TLC. The reaction was quenched with the addition of water and warmed to room temperature. The product was extracted with EtOAc (3 x 50 mL). The combined organic layers were washed with brine (25 mL), dried with Na<sub>2</sub>SO<sub>4</sub>, filtered, and concentrated under reduced pressure. The crude mixture was used without further purification.

**Physical State:** Light brown oil

**R<sub>f</sub>:** 0.53 (70% EtOAc/Hexanes)

**<sup>1</sup>H NMR** (400 MHz, CDCl<sub>3</sub>) δ 8.35 (d, J = 5.6 Hz, 1H), 6.65 (dt, J = 8.1, 2.4 Hz, 2H), 5.87 (ddt, J = 16.9, 10.2, 6.6 Hz, 1H), 5.05 (dt, J = 17.1, 1.6 Hz, 1H), 4.97 (dd, J = 10.2, 1.6 Hz, 1H), 3.83 (s, 3H), 2.87 – 2.79 (m, 2H), 2.53 – 2.43 (m, 2H).

##### Piperdenone 24

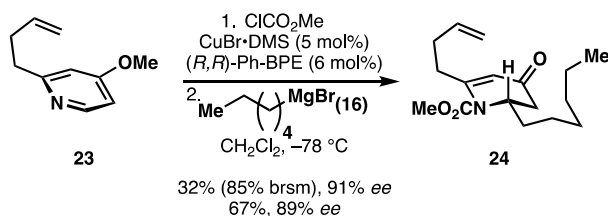

A modified procedure from Harutyunan was employed.<sup>1</sup>

To a flame-dried Schlenk flask was added CuBr·DMS (3 mg, 15 μmol, 5 mol%), ligand (R,R)-Ph-BPE (9 mg, 18 μmol, 6 mol%) and DCM (3 mL, 0.1 M) and stirred for 20 min. Pyridine **23** (50 mg, 0.31 mmol, 1.0 equiv.) was added at once and stirred for 5 min. Methyl chloroformate (0.07 mL, 0.9 mmol, 3.0 equiv.) was added dropwise and stirred for 10 min. The reaction was cooled to -78 °C and n-hexylmagnesium bromide was added dropwise over 10 min. The reaction was allowed to stir at -78 °C for 12 h or until the consumption of starting material was observed, as determined by TLC. The reaction was quenched with 1.0 M HCl. The product was extracted with DCM (3 × 5 mL). The combined organic layers were washed with brine (5 mL), dried with Na<sub>2</sub>SO<sub>4</sub>, filtered, and concentrated under reduced pressure. The crude mixture was purified by flash column chromatography (20% EtOAc/Hexanes) to afford 0.06 g (67% yield, 89% ee) of piperdenone **24**.

**Physical State:** Light orange oil

**R<sub>f</sub>:** 0.40 (20% EtOAc/Hexanes)

**<sup>1</sup>H NMR** (600 MHz, CDCl<sub>3</sub>) δ 5.76 (ddt, J = 16.8, 10.2, 6.5 Hz, 1H), 5.42 (s, 1H), 5.07 – 4.93 (m, 2H), 4.70 (q, J = 6.4 Hz, 1H), 3.81 (s, 3H), 3.11 (ddd, J = 14.7, 8.5, 6.3 Hz, 1H), 2.77 (dd, J = 17.0, 6.0 Hz, 1H), 2.50 – 2.42 (m, 1H), 2.34 (d, J = 17.0 Hz, 1H), 2.22 (dh, J = 15.6, 6.9 Hz, 2H), 1.70 (dtd, J = 13.6, 9.6, 4.9 Hz, 1H), 1.54 – 1.45 (m, 1H), 1.25 (dt, J = 16.7, 5.5 Hz, 8H), 0.86 (t, J = 7.0 Hz, 3H).

**<sup>13</sup>C NMR** (176 MHz, CDCl<sub>3</sub>) δ 193.8, 157.7, 154.2, 136.8, 115.9, 113.0, 56.5, 53.7, 41.2, 35.3, 32.1, 31.7, 30.4, 29.1, 26.2, 22.7, 14.1.

**HRMS (ESI) m/z:** [M+H]<sup>+</sup> calc'd for C<sub>17</sub>H<sub>28</sub>NO<sub>3</sub><sup>+</sup> 294.2064; found 294.2073

**[α]<sub>D</sub><sup>25</sup>:** +252.857 (c: 0.014 g/mL CHCl<sub>3</sub>)

## Piperidone 19k

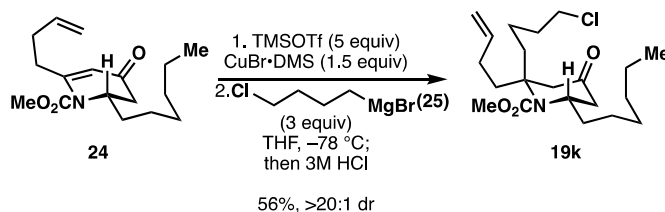

To a flame dried 100 mL round bottom flask was added CuBr·DMS (1.4 g, 6.7 mmol, 1.5 equiv.) followed by piperdenone **24** (1.3 g, 4.4 mmol, 1 equiv.) and THF (22 mL, 0.2 M). The reaction mixture was cooled to 0 °C and TMSOTf (1.2 mL, 6.7 mmol, 5 equiv.) was added dropwise. The resultant solution was stirred for 0.5 h at 0 °C then cooled to -78 °C. Chlorobutylmagnesium bromide **25** (14.6 mL, 0.91 M, 3 equiv.), prepared by General Procedure A, was added to the reaction flask via a syringe pump over one hour. Once the syringe pump addition is complete, the reaction was allowed to stir at -78 °C until the consumption of starting material was observed, as determined by TLC. The reaction was quenched with a 1:1 solution of sat. aqueous NH<sub>4</sub>Cl and aqueous NH<sub>4</sub>OH (15 mL) and warmed to room temperature. The product was extracted with EtOAc (3 x 50 mL) and the combined organic layer stirred with 1 M HCl for 0.25 h. After 0.25 h, the solution was neutralized with the addition of K<sub>2</sub>CO<sub>3</sub>. The layers were separated and the organic layer washed with water (30 mL), brine (30 mL), dried with Na<sub>2</sub>SO<sub>4</sub>, filtered, and concentrated under reduced pressure. The crude mixture was purified by flash column chromatography (10% EtOAc/Hexanes) to afford 0.94 g (55% yield) of chloropiperdinone **19k**.

**Physical State:** Light yellow oil

**R<sub>f</sub>:** 0.43 (10% EtOAc/Hexanes)

**<sup>1</sup>H NMR** (600 MHz, CDCl<sub>3</sub>) δ 5.80 (ddt, J = 16.8, 10.2, 6.6 Hz, 1H), 5.04 (dd, J = 17.1, 1.5 Hz, 1H), 4.97 (d, J = 9.0 Hz, 1H), 4.44 (s, 1H), 3.71 (s, 3H), 3.52 – 3.46 (m, 2H), 2.88 (d, J = 17.2 Hz, 1H), 2.67 – 2.60 (m, 1H), 2.53 – 2.47 (m, 2H), 2.39 (d, J = 17.2 Hz, 1H), 2.06 (s, 1H), 1.95 (q, J = 7.4 Hz, 2H), 1.70 (ddd, J = 16.9, 13.8, 7.1 Hz, 4H), 1.48 – 1.38 (m, 2H), 1.37 – 1.19 (m, 10H), 0.88 (t, J = 7.0 Hz, 3H).

**<sup>13</sup>C NMR** (176 MHz, CDCl<sub>3</sub>) δ 208.6, 137.9, 115.0, 61.1, 52.4, 52.2, 46.8, 44.6, 41.3, 39.4, 37.7, 37.5, 32.7, 31.7, 29.7, 29.0, 28.7, 27.1, 22.6, 21.9, 14.0.

**HRMS (ESI) m/z:**  $[M+H]^+$  calc'd for  $C_{21}H_{37}ClNO_3^+$  386.2456; found 386.2442

$[\alpha]_D^{25}$ : -65.400 (c: 0.005 g/mL  $CHCl_3$ )

### Azadecalinone **21b**

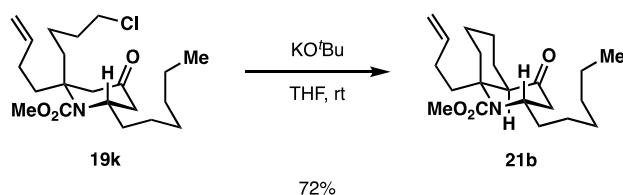

To a 50 mL round bottom flask was added chloropiperidinone **19k** (0.120 g, 0.31 mmol, 1 equiv.) and THF (15.5 mL, 0.02 M). A 0.5 M solution of <sup>t</sup>BuOK (0.28 g, 2.5 mmol, 8 equiv.) in THF (5 mL) was added via syringe pump over one hour. After addition was completed, the reaction solution was allowed to stir until consumption of starting material was observed, as determined by TLC. The reaction was quenched with 0.1 M HCl (5 mL) and the product extracted with EtOAc (3 x 10 mL). The combined organic layers were washed with water (10 mL), brine (10 mL), dried with  $Na_2SO_4$ , filtered, and concentrated under reduced pressure. The crude mixture was purified by flash column chromatography (5% EtOAc/Hexanes) to afford 0.078 g (72% yield) of azadecalinone **21b**.

**Physical State:** Light yellow oil

**R<sub>f</sub>:** 0.53 (15% EtOAc/Hexanes)

**<sup>1</sup>H NMR** (700 MHz,  $CDCl_3$ )  $\delta$  5.83 (dddd,  $J = 16.0, 12.6, 8.5, 4.3$  Hz, 1H), 5.04 (d,  $J = 17.2$  Hz, 1H), 4.96 (d,  $J = 10.1$  Hz, 1H), 4.42 (s, 1H), 3.69 (s, 3H), 2.79 – 2.52 (m, 5H), 2.41 (d,  $J = 13.8$  Hz, 1H), 1.99 – 1.86 (m, 3H), 1.75 – 1.68 (m, 1H), 1.56 (tt,  $J = 13.9, 4.3$  Hz, 1H), 1.52 – 1.42 (m, 3H), 1.39 – 1.34 (m, 1H), 1.33 – 1.20 (m, 9H), 1.15 (dt,  $J = 13.5, 4.4$  Hz, 1H), 0.87 (t,  $J = 7.1$  Hz, 3H).

**<sup>13</sup>C NMR** (176 MHz,  $CDCl_3$ )  $\delta$  209.6, 138.5, 114.9, 61.8, 52.4, 51.6, 48.8, 41.6, 37.6, 31.9, 29.1, 28.7, 27.2, 22.7, 22.2, 22.1, 21.4, 14.2.

**HRMS (ESI) m/z:**  $[M+H]^+$  calc'd for  $C_{21}H_{36}NO_3^+$  350.2690; found 350.2709

$[\alpha]_D^{25}$ : -109.000 (c: 0.006 g/mL CHCl<sub>3</sub>)

### Amine 22b

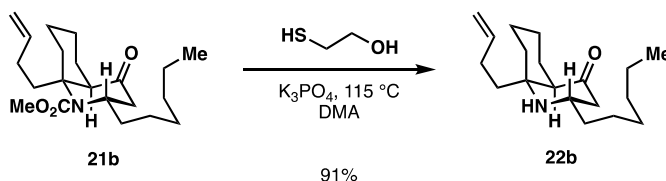

A modified procedure from Chen was employed.<sup>3</sup>

To a sealed tube was added azadecalinalone **21b** (0.127 g, 0.36 mmol, 1 equiv.), potassium phosphate tribasic (0.308 g, 1.4 mmol, 4 equiv.), 2-mercaptoethanol (0.05 mL, 0.73 mmol, 2 equiv.), and DMA (1.5 mL, 0.25 M). The reaction mixture was heated to 115 °C for 16 h or until consumption of starting material was observed, as determined by TLC. The reaction was cooled to room temperature then poured into water (5 mL). The product was extracted with EtOAc (3 x 5 mL) and washed with water (2 x 10 mL), then brine (2 x 10 mL), dried with Na<sub>2</sub>SO<sub>4</sub>, filtered, and concentrated under reduced pressure. The crude mixture was purified by flash column chromatography (10% EtOAc/Hexanes) to afford 0.096 g (91% yield) of amine **22b**. The characterization data of amine 22b has been previously reported.<sup>4</sup>

**Physical State:** Light yellow oil

**R<sub>f</sub>:** 0.47 (10% EtOAc/Hexanes)

**<sup>1</sup>H NMR** (400 MHz, CDCl<sub>3</sub>) δ 5.87 (ddt, J = 16.8, 10.1, 6.6 Hz, 1H), 5.07 (dd, J = 17.1, 1.7 Hz, 1H), 4.98 (d, J = 10.1 Hz, 1H), 3.12 (dtd, J = 11.7, 6.1, 2.9 Hz, 1H), 2.36 (dd, J = 13.5, 2.9 Hz, 1H), 2.24 (s, 1H), 2.21 – 2.04 (m, 3H), 1.95 (t, J = 12.2 Hz, 1H), 1.80 (ddd, J = 16.3, 11.1, 5.3 Hz, 1H), 1.68 (ddd, J = 14.2, 11.5, 5.5 Hz, 1H), 1.62 – 1.52 (m, 2H), 1.49 – 1.35 (m, 6H), 1.30 (d, J = 16.2 Hz, 10H), 0.88 (t, J = 6.7 Hz, 3H).

**<sup>13</sup>C NMR** (176 MHz, CDCl<sub>3</sub>) δ 211.1, 138.9, 114.7, 58.2, 53.8, 50.0, 48.8, 37.8, 37.6, 31.8, 31.6, 29.3, 27.3, 25.6, 22.6, 22.6, 21.4, 21.1, 14.1.



**HRMS (ESI) m/z:** [M+H]<sup>+</sup> calc'd for C<sub>19</sub>H<sub>34</sub>NO<sup>+</sup> 292.2635; found 292.2647

**[α]<sub>D</sub><sup>25</sup>:** -20.200 (c: 0.005 g/mL CHCl<sub>3</sub>)

Table S2: Aminoketone <sup>1</sup>H NMR Chemical Shift Comparison

| Snider <sup>4</sup> (300 MHz, CDCl <sub>3</sub> ) | Aminoketone22b (400 MHz, CDCl <sub>3</sub> )                                                                                               |
|---------------------------------------------------|--------------------------------------------------------------------------------------------------------------------------------------------|
| 5.87 (ddt, J=16.9, 10.2, 6.6 Hz, 1H)              | 5.87 (ddt, J=16.8, 10.1, 6.6 Hz, 1H)                                                                                                       |
| 5.07 (br d, J=16.9 Hz, 1H)                        | 5.07 (dd, J=17.1, 1.7 Hz, 1H)                                                                                                              |
| 4.99 (bd d, J=10.2 Hz, 1H)                        | 4.98 (d, J=10.1 Hz, 1H)                                                                                                                    |
| 3.12 (dddd, J= 11.5, 2.7, 6.0, 6.0 Hz, 1H)        | 3.12 (dtd, J=11.7, 6.1, 2.9 Hz, 1H)                                                                                                        |
| 2.37 (dd, J=13.5, 2.7, 1H)                        | 2.36 (dd, J=13.5, 2.9 Hz, 1H)                                                                                                              |
| 2.25 (dd, J=4.0, 4.0 Hz, 1H)                      | 2.24 (s, 1H)                                                                                                                               |
| 2.21–2.05 (m, 2H)                                 | 2.21–2.04 (m, 3H)                                                                                                                          |
| 1.96 (dd, J=13.5, 11.5 Hz, 1H)                    | 1.95 (t, J=12.2 Hz, 1H)                                                                                                                    |
| 1.87–1.20 (m, 20H)                                | 1.80 (ddd, J=16.3, 11.1, 5.3 Hz, 1H), 1.68 (ddd, J=14.2, 11.5, 5.5 Hz, 1H), 1.62–1.52 (m, 2H), 1.49–1.35 (m, 6H), 1.30 (d, J=16.2 Hz, 10H) |
| 0.88 (t, J=6.5 Hz, 3H)                            | 0.88 (t, J=6.7 Hz, 3H)                                                                                                                     |

### Amine 22b – One Pot Strategy

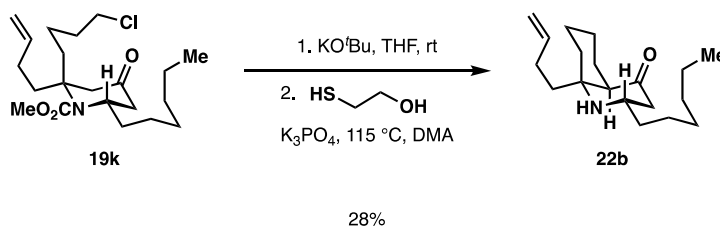

To a 50 mL round bottom flask was added chloropiperidinone **19k** (0.020 g, 0.052 mmol, 1 equiv.) and THF (0.5 mL, 0.1 M). A 0.5 M solution of <sup>t</sup>BuOk (0.058 g, 0.518 mmol, 10 equiv.) in THF (1 mL) was added via syringe pump over one hour. After addition was completed, the reaction solution was allowed to stir until consumption of starting material was observed, as determined by TLC. DMA (0.5 mL, 0.1 M) was added to the reaction flask followed by potassium phosphate tribasic (0.022 g, 0.104 mmol, 4 equiv.) and 2-mercaptoethanol (0.02 mL, 0.207 mmol, 2 equiv.). The reaction mixture was heated to 115 °C for 16 h or until consumption of starting material was observed, as determined by TLC. The reaction was cooled to room temperature then poured into water (5 mL). The

product was extracted with EtOAc (3 x 5 mL) and washed with water (2 x 10 mL), then brine (2 x 10 mL), dried with Na<sub>2</sub>SO<sub>4</sub>, filtered, and concentrated under reduced pressure. The crude mixture was purified by flash column chromatography (10% EtOAc/Hexanes) to afford 0.05 g (28% yield) of amine **22b**.

### Chloroamine **S1**

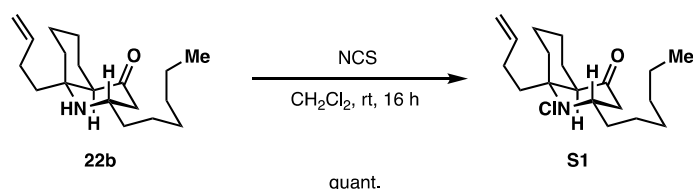

To a flame dried flask was added amine **22b** (0.025 g, 0.086 mmol, 1 equiv.), N-chlorosuccinimide (0.023 g, 0.17 mmol, 2.5 equiv.), and DCM (3 mL, 0.03M). The solution was allowed to stir at room temperature for 16 h or until consumption of starting material was observed, as determined by TLC. The reaction mixture was concentrated under reduced pressure and purified by flash column chromatography (10% EtOAc/Hexanes) to afford 0.028 g (>99% yield) of chloroamine **S1**. The characterization data of chloroamine **S1** has been previously reported.<sup>4</sup>

**<sup>1</sup>H NMR** (400 MHz, CDCl<sub>3</sub>) δ 5.95 – 5.80 (m, 1H), 5.12 – 4.91 (m, 2H), 3.55 (s, 1H), 2.69 – 2.49 (m, 2H), 2.25 (d, J = 14.8 Hz, 3H), 2.09 – 1.89 (m, 3H), 1.87 – 1.59 (m, 3H), 1.55 – 1.14 (m, 14H), 0.88 (t, J = 6.5 Hz, 3H).

### Cylindricines A and B

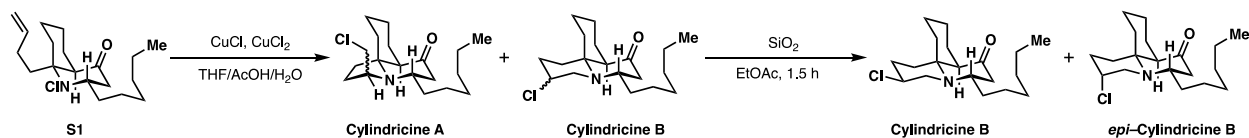

To a flame dried flask was added chloroamine **S1** (0.024 g, 0.074 mmol, 1 equiv.) and THF (1.8 mL, 0.04 M). The reaction flask was then cooled to 0 °C and treated with a solution of CuCl (0.007 g, 0.066 mmol, 0.9 equiv.) and CuCl<sub>2</sub> (0.034 g, 0.25 mmol, 3.4

equiv.) in 1.2 mL of THF/H<sub>2</sub>O/AcOH (2:1:1, 0.06 M) over 10 min. The solution was stirred at 0 °C for 1 h or until consumption of starting material was observed, as determined by TLC. The reaction was neutralized with sat. aqueous NaHCO<sub>3</sub> to ~pH 7. The product was extracted with DCM (3 x 5 mL). The combined organic layers were washed with brine (5 mL), dried with Na<sub>2</sub>SO<sub>4</sub>, filtered, and concentrated under reduced pressure to yield 1:1 dr of cylindricine A and *epi*-cylindricine A. The crude mixture was purified by flash column chromatography (3% EtOAc/Hexanes) to afford 0.016 g (67% yield, 1:2) of cylindricine A and cylindricine B. The mixture was stirred with 0.100 g SiO<sub>2</sub> in 2 mL of EtOAc for 1.5 h, then filtered to afford cylindricine B and a 9:1 mixture of *epi*-cylindricine B and *epi*-cylindricine A. The characterization data of cylindricine B has been previously reported.<sup>5</sup>

**Physical State:** Light yellow oil

**R<sub>f</sub>:** 0.37 (5% EtOAc/Hexanes)

**(+)-cylindricine B**

**<sup>1</sup>H NMR** (600 MHz, C<sub>6</sub>D<sub>6</sub>) δ 3.83 (tt, *J* = 9.7, 4.5 Hz, 1H), 3.01 (d, *J* = 8.1 Hz, 1H), 2.68 (s, 1H), 2.38 (dd, *J* = 11.7, 9.9 Hz, 1H), 2.28 (dd, *J* = 13.7, 2.1 Hz, 1H), 2.16 (dd, *J* = 14.1, 3.4 Hz, 1H), 2.04 – 1.97 (m, 1H), 1.87 (dd, *J* = 13.7, 4.1 Hz, 2H), 1.70 – 1.56 (m, 2H), 1.53 – 1.40 (m, 2H), 1.40 – 1.24 (m, 5H), 1.24 – 1.07 (m, 8H), 1.04 – 0.86 (m, 6H).

**<sup>13</sup>C NMR** (151 MHz, C<sub>6</sub>D<sub>6</sub>) δ 207.6, 59.1, 57.2, 54.2, 50.0, 45.7, 34.1, 33.0, 32.2, 30.6, 29.9, 23.9, 23.0, 22.2, 21.9, 21.5, 14.3.

**HRMS (ESI) m/z:** [M+H]<sup>+</sup> calc'd for C<sub>19</sub>H<sub>33</sub>CINO<sup>+</sup> 326.2245; found 326.2260

**[α]<sub>D</sub><sup>20</sup>:** +29.000 (c: 0.0016 g/mL CH<sub>2</sub>Cl<sub>2</sub>)

Reported literature value for (–)-cylindricine B: **[α]<sub>D</sub><sup>20</sup>:** –20.100 (c: 0.00075 g/mL CH<sub>2</sub>Cl<sub>2</sub>)<sup>5</sup>

Table S3: Cylindricine B <sup>1</sup>H NMR Chemical Shift Comparison

| Fuwa <sup>5</sup> (500 MHz, C <sub>6</sub> D <sub>6</sub> )<br>C <sub>6</sub> HD <sub>5</sub> : δ <sub>H</sub> = 7.15 ppm | Observed (600 MHz, C <sub>6</sub> D <sub>6</sub> )<br>C <sub>6</sub> HD <sub>5</sub> : δ <sub>H</sub> = 7.16 ppm |
|---------------------------------------------------------------------------------------------------------------------------|------------------------------------------------------------------------------------------------------------------|
| 3.82 (dddd, <i>J</i> =10.0, 10.0, 5.0, 5.0 Hz, 1H)                                                                        | 3.83 (tt, <i>J</i> =9.7, 4.5 Hz, 1H)                                                                             |
| 3.02–2.98 (m, 1H)                                                                                                         | 3.01 (d, <i>J</i> =8.1, 1H)                                                                                      |
| 2.70–2.63 (m, 1H)                                                                                                         | 2.68 (s, 1H)                                                                                                     |

|                                           |                                                        |
|-------------------------------------------|--------------------------------------------------------|
| 2.36 (dd, J=12.0, 10.0 Hz, 1H)            | 2.38 (ddm J=11.7, 9.9 Hz, 1H)                          |
| 2.27 (dddd, J=14.0, 2.0, 2.0, 2.0 Hz, 1H) | 2.28 (dd, J= 13.7, 2.1 Hz, 1H)                         |
| 2.15 (dd, J=12.5, 3.5 Hz, 1H)             | 2.16 (dd, J=14.1, 3.4, 1H)                             |
| 2.00 (dd, J=12.5, 12.5 Hz, 1H)            | 2.04–1.97 (m, 1H)                                      |
| 1.87–1.82 (m, 2H)                         | 1.87 (dd, J=13.7, 4.1 Hz, 2H)                          |
| 1.67–1.57 (m, 2H)                         | 1.70–1.56 (m, 2H)                                      |
| 1.51–1.23 (m, 6H)                         | 1.56–1.40 (m, 2H)                                      |
| 1.21–0.89 (m, 15H)                        | 1.40–1.24 (m 5H), 1.24–1.07 (m, 8H), 1.04–0.86 (m, 6H) |

Table S4: Cylindricine B <sup>13</sup>C NMR Chemical Shift Comparison

| Fuwa <sup>5</sup> (125 MHz, C <sub>6</sub> D <sub>6</sub> )<br>C <sub>6</sub> HD <sub>5</sub> : δ <sub>H</sub> = 128.0 ppm | Observed (151 MHz, C <sub>6</sub> D <sub>6</sub> )<br>C <sub>6</sub> HD <sub>5</sub> : δ <sub>H</sub> = 128.06 ppm |
|----------------------------------------------------------------------------------------------------------------------------|--------------------------------------------------------------------------------------------------------------------|
| 207.6                                                                                                                      | 207.6                                                                                                              |
| 59.1                                                                                                                       | 59.1                                                                                                               |
| 57.2                                                                                                                       | 57.2                                                                                                               |
| 54.1                                                                                                                       | 54.2                                                                                                               |
| 53.9                                                                                                                       | Not observed                                                                                                       |
| 49.9                                                                                                                       | 50.0                                                                                                               |
| 45.6                                                                                                                       | 45.7                                                                                                               |
| 34.0                                                                                                                       | 34.1                                                                                                               |
| 32.9                                                                                                                       | 33.0                                                                                                               |
| 32.1                                                                                                                       | 32.2                                                                                                               |
| 30.5                                                                                                                       | 30.6                                                                                                               |
| 29.8                                                                                                                       | 29.9                                                                                                               |
| 23.8                                                                                                                       | 23.9                                                                                                               |
| 23.0                                                                                                                       | 23.0                                                                                                               |
| 22.1                                                                                                                       | 22.2                                                                                                               |
| 21.8                                                                                                                       | 21.9                                                                                                               |
| 21.4                                                                                                                       | 21.5                                                                                                               |
| 21.2                                                                                                                       | Not observed                                                                                                       |
| 14.3                                                                                                                       | 14.3                                                                                                               |

*epi*-cylindricine B

**Physical State:** Light yellow oil

**R<sub>f</sub>:** 0.33 (5% EtOAc/Hexanes)

**<sup>1</sup>H NMR** (600 MHz, C<sub>6</sub>D<sub>6</sub>) δ 3.81 (tt, *J* = 9.0, 4.1 Hz, 1H), 3.07 – 2.95 (m, 1H), 2.79 (d, *J* = 9.6 Hz, 1H), 2.57 – 2.51 (m, 1H), 2.29 (d, *J* = 11.9 Hz, 1H), 2.11 (d, *J* = 9.7 Hz, 1H), 2.03 (dd, *J* = 14.5, 2.9 Hz, 1H), 1.96 – 1.89 (m, 1H), 1.83 (dt, *J* = 14.1, 4.7 Hz, 1H), 1.67 (s, 1H), 1.62 – 1.56 (m, 1H), 1.43 – 1.25 (m, 7H), 1.20 – 1.12 (m, 7H), 1.06 – 0.79 (m, 7H).

**<sup>13</sup>C NMR** (151 MHz, C<sub>6</sub>D<sub>6</sub>) δ 207.7, 59.0, 57.4, 53.3, 47.7, 43.0, 33.7, 32.2, 32.0, 30.8, 29.6, 25.5, 23.0, 22.3, 21.7, 21.4, 14.3.

**HRMS (ESI) *m/z***: [M+H]<sup>+</sup> calc'd for C<sub>19</sub>H<sub>33</sub>ClNO<sup>+</sup> 326.2245; found 326.2280

### Cylindricine A – One Pot Strategy

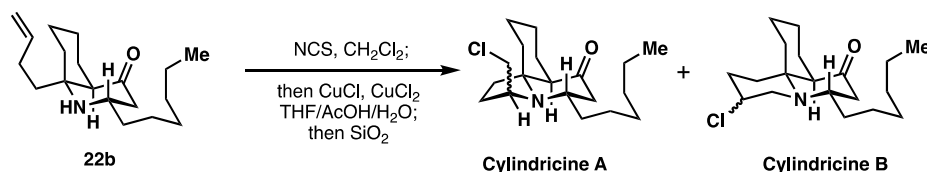

To a flame dried flask was added amine **22b** (0.020 g, 0.068 mmol, 1 equiv.), N-chlorosuccinimide (0.023 g, 0.17 mmol, 2.5 equiv.), and DCM (2 mL, 0.03M). The solution was allowed to stir at room temperature for 16 h or until consumption of starting material was observed, as determined by TLC. The reaction mixture was then cooled to 0 °C and treated with a solution of CuCl (0.006 g, 0.061 mmol, 0.9 equiv.) and CuCl<sub>2</sub> (0.031 g, 0.23 mmol, 3.4 equiv.) in 1.7 mL of THF/H<sub>2</sub>O/AcOH (2:1:1, 0.04 M) over 10 min. The solution was stirred at 0 °C for 1 h or until consumption of starting material was observed, as determined by TLC. The reaction was neutralized with sat. aqueous NaHCO<sub>3</sub> to ~pH 7. The product was extracted with DCM (3 x 5 mL). The combined organic layers were washed with brine (5 mL), dried with Na<sub>2</sub>SO<sub>4</sub>, filtered, and concentrated under reduced pressure. The crude mixture was purified by flash column chromatography (3% EtOAc/Hexanes) to afford 0.006 g (30% yield) of cylindricine A and cylindricine B.

#### e. Determination of Enantiomeric Excess of **24**

Conditions: ChiralPak IA; 25 °C; 3% IPA/CO<sub>2</sub> over 12 min; 3.0 mL/min; 254 nm

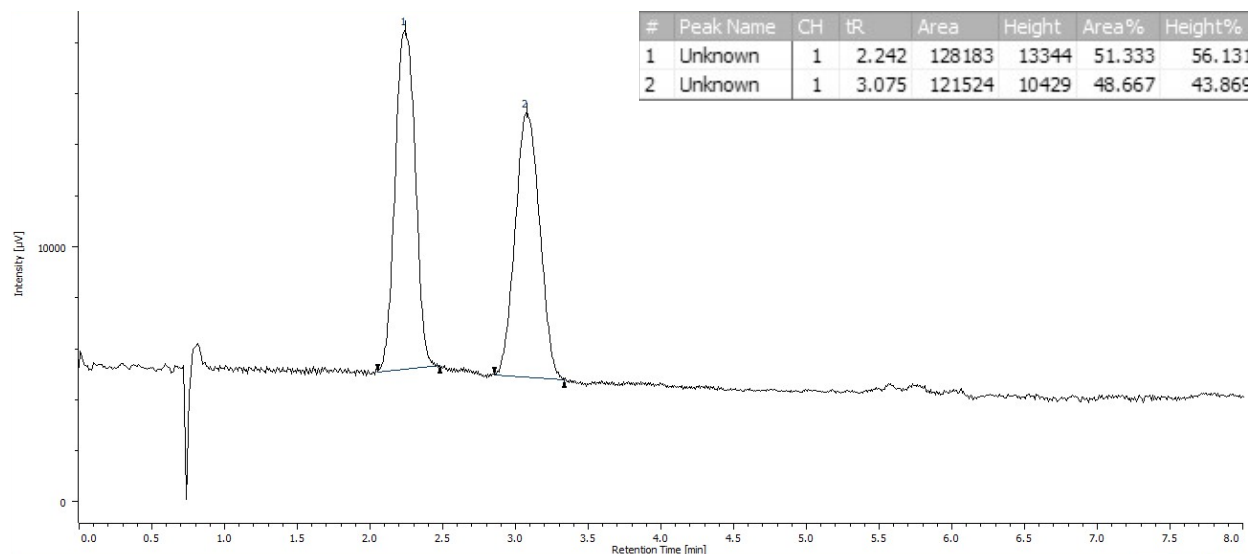

Figure S1: Chromatogram of (±)-24; 2.6% ee

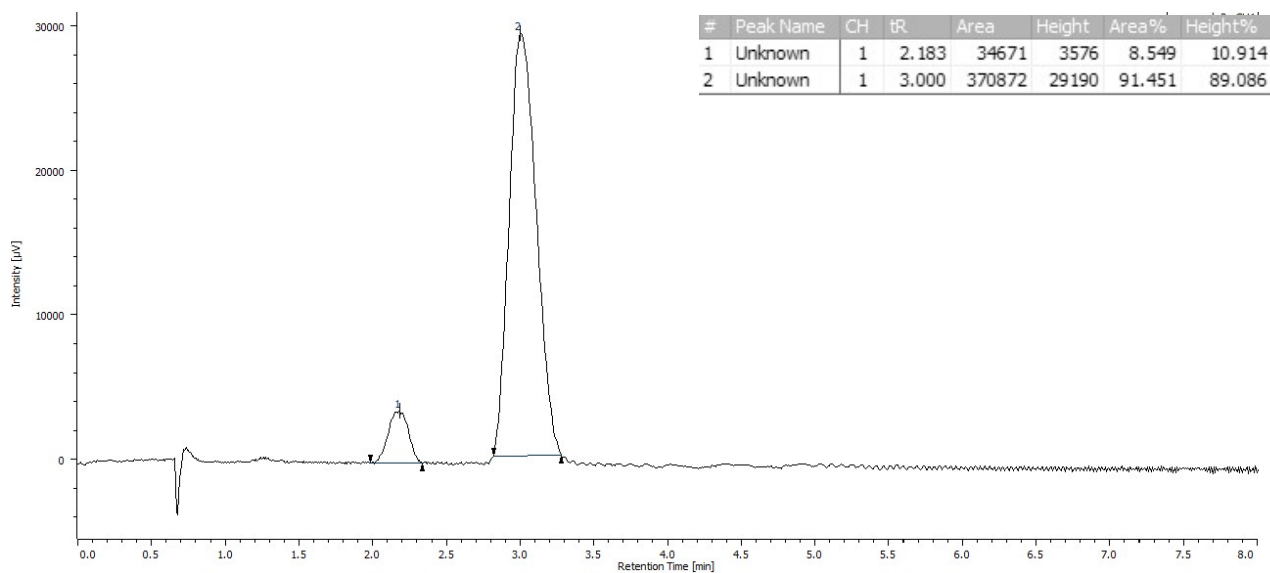

Figure S2: Chromatogram of (-)-24; 83.0% ee \*81.5% ee average of 3 runs.

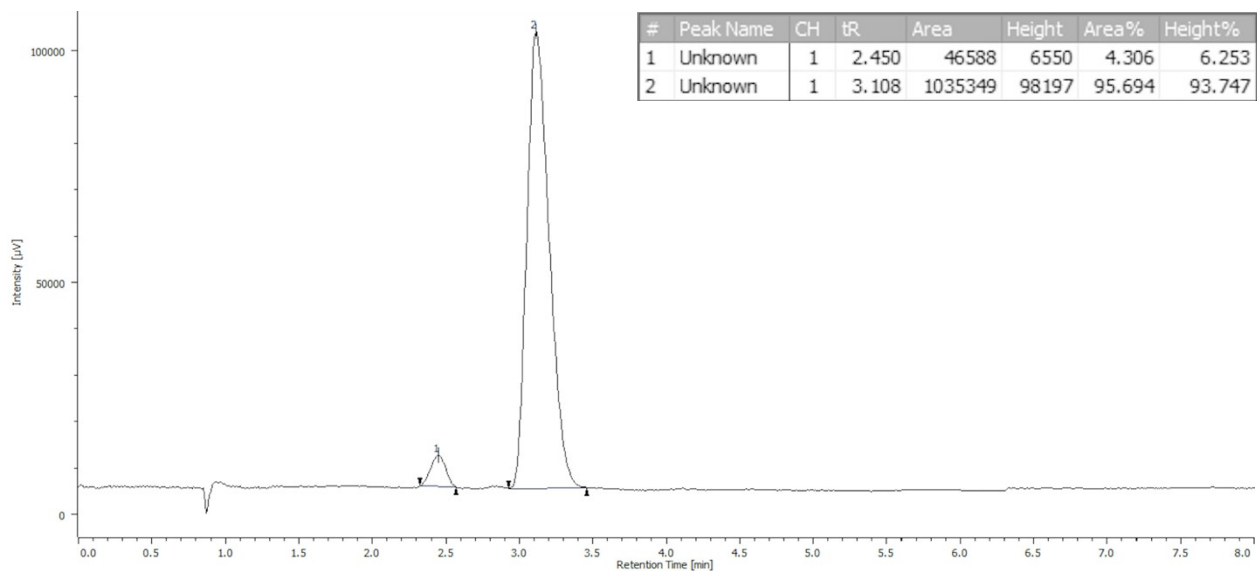

Figure S3: Chromatogram of (-)-24; 91.4% ee

### 3. References

- (1) Guo, Y.; Reis, M. C.; Kootstra, J.; Harutyunyan, S. *ACS Catalysis* **2021**, *11*(14), 8476–8483
- (2) Flick, A. C.; Caballero, M. J. A.; Padwa, A. *Organic Letters* **2008**, *10*(9), 1871–1874
- (3) Scarrolin, T.; Gharbaoui T.; Chen C. *Organic Letters* **2022**, *24*(20), 3736–3740
- (4) Snider, B.; Liu, T. *The Journal of Organic Chemistry* **1997**, *62*(16), 5630–5633
- (5) Hanzawa, R.; Fuwa, H. *Org. Lett.* **2023**, *25*(11), 1984–1988



## 4. $^1\text{H}$ NMR and $^{13}\text{C}$ NMR Spectra

7.26 CDCl3

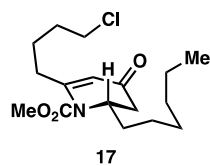

| Parameter                | Value  |
|--------------------------|--------|
| 1 Solvent                | CDCl3  |
| 2 Spectrometer Frequency | 700.22 |
| 3 Nucleus                | 1H     |

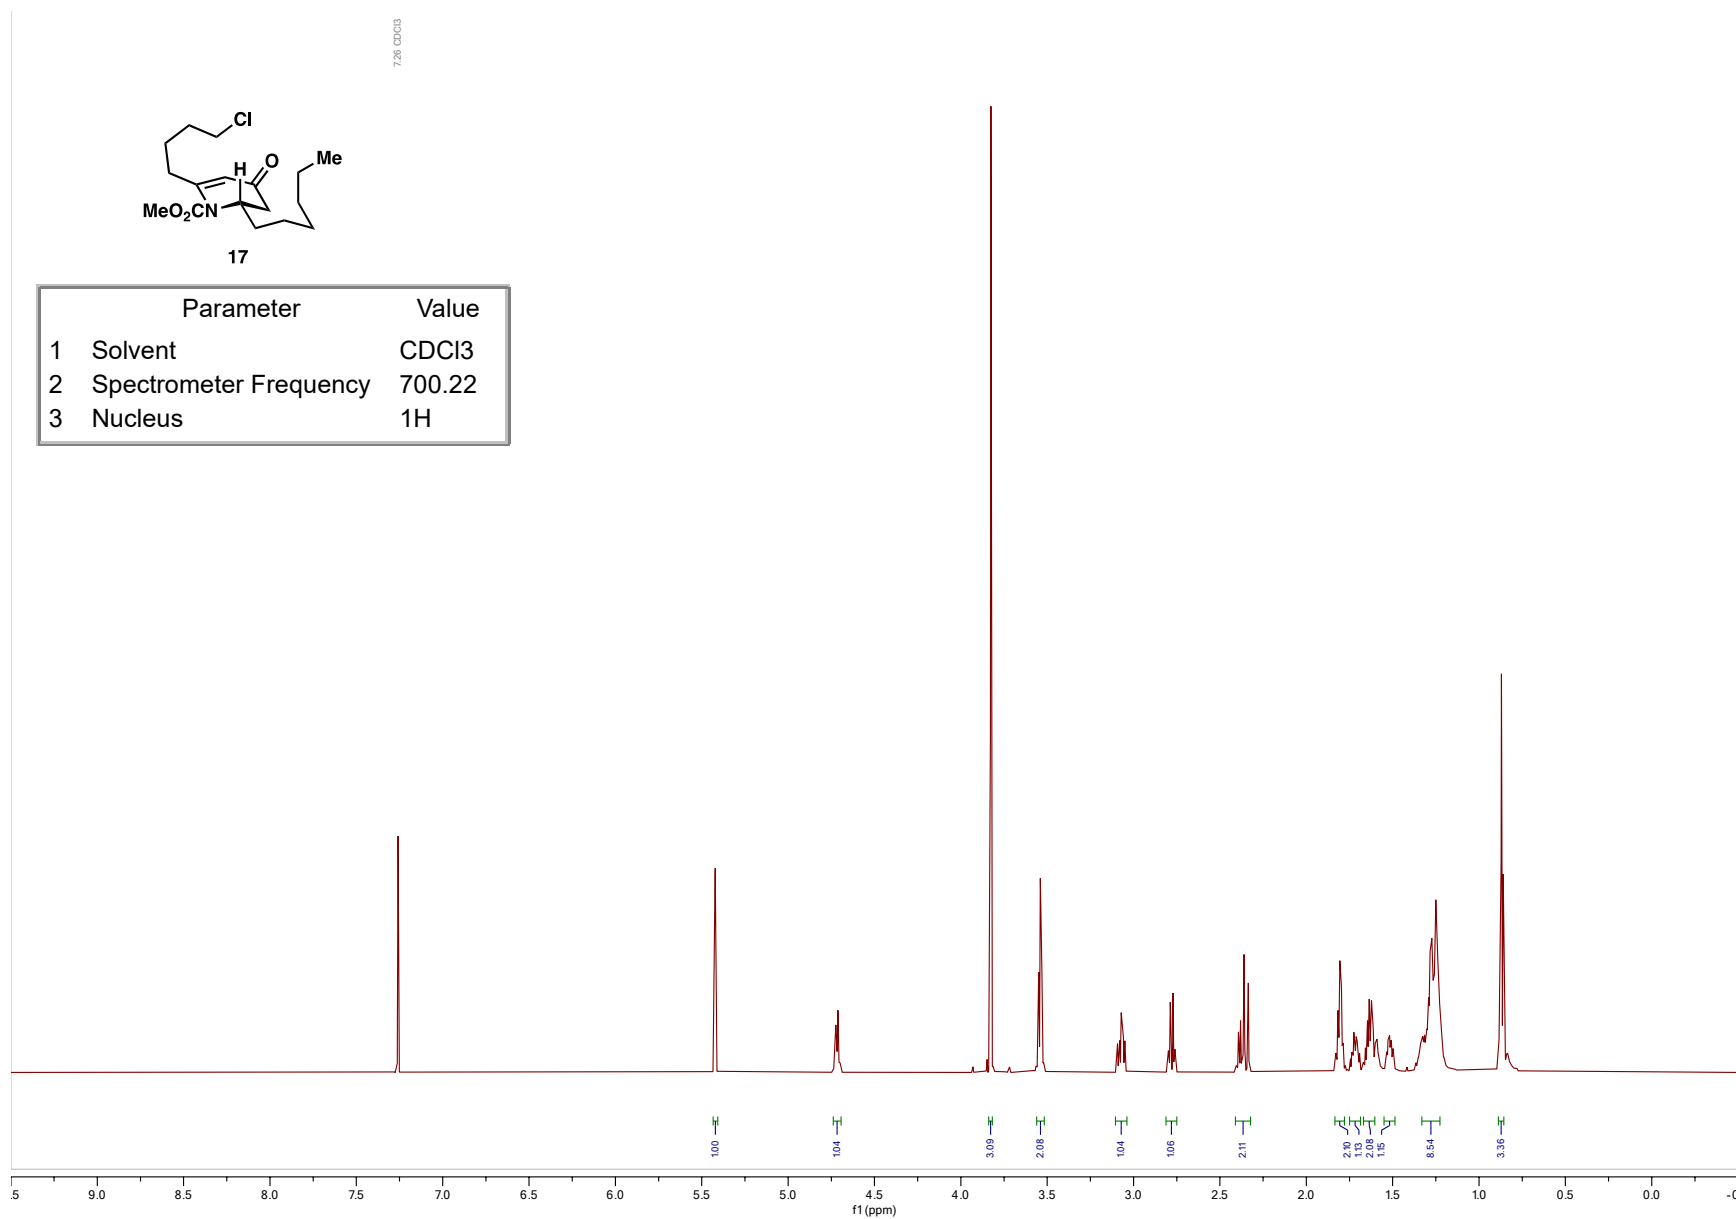

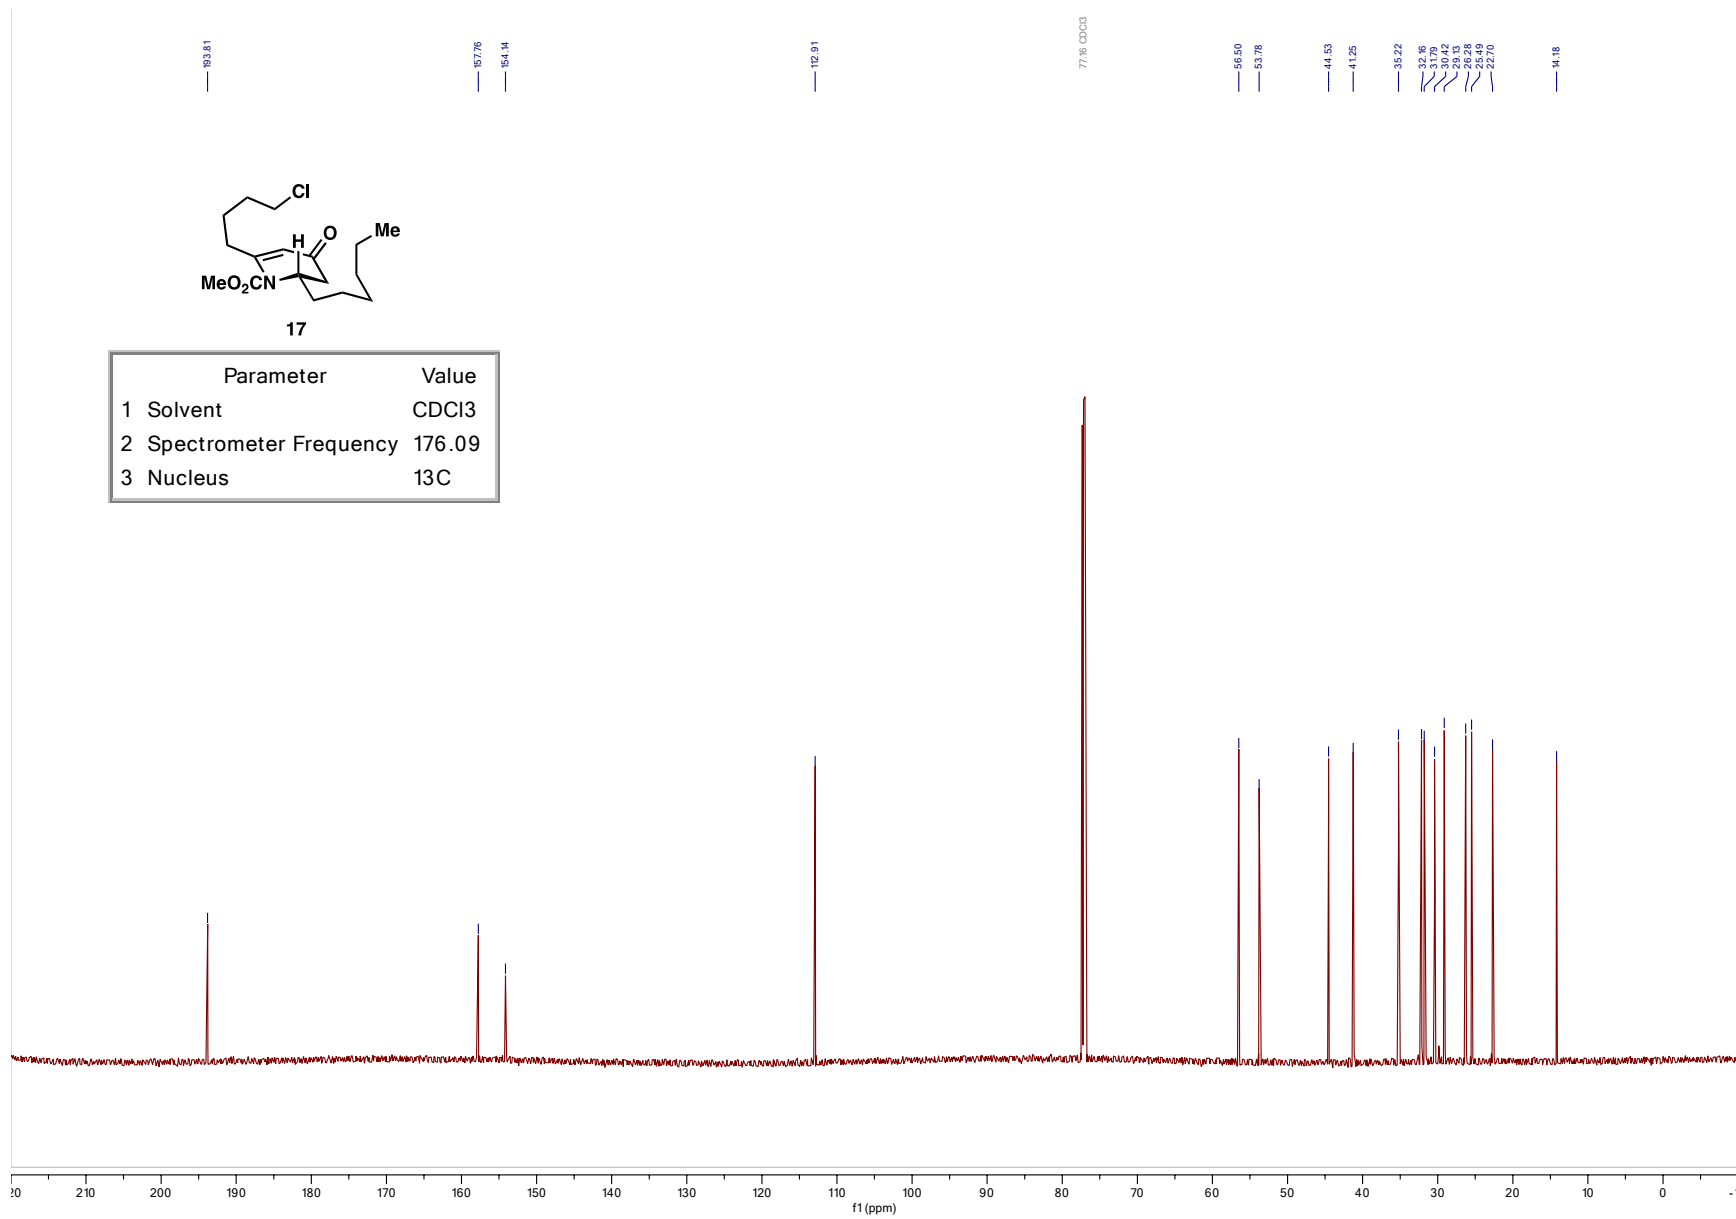

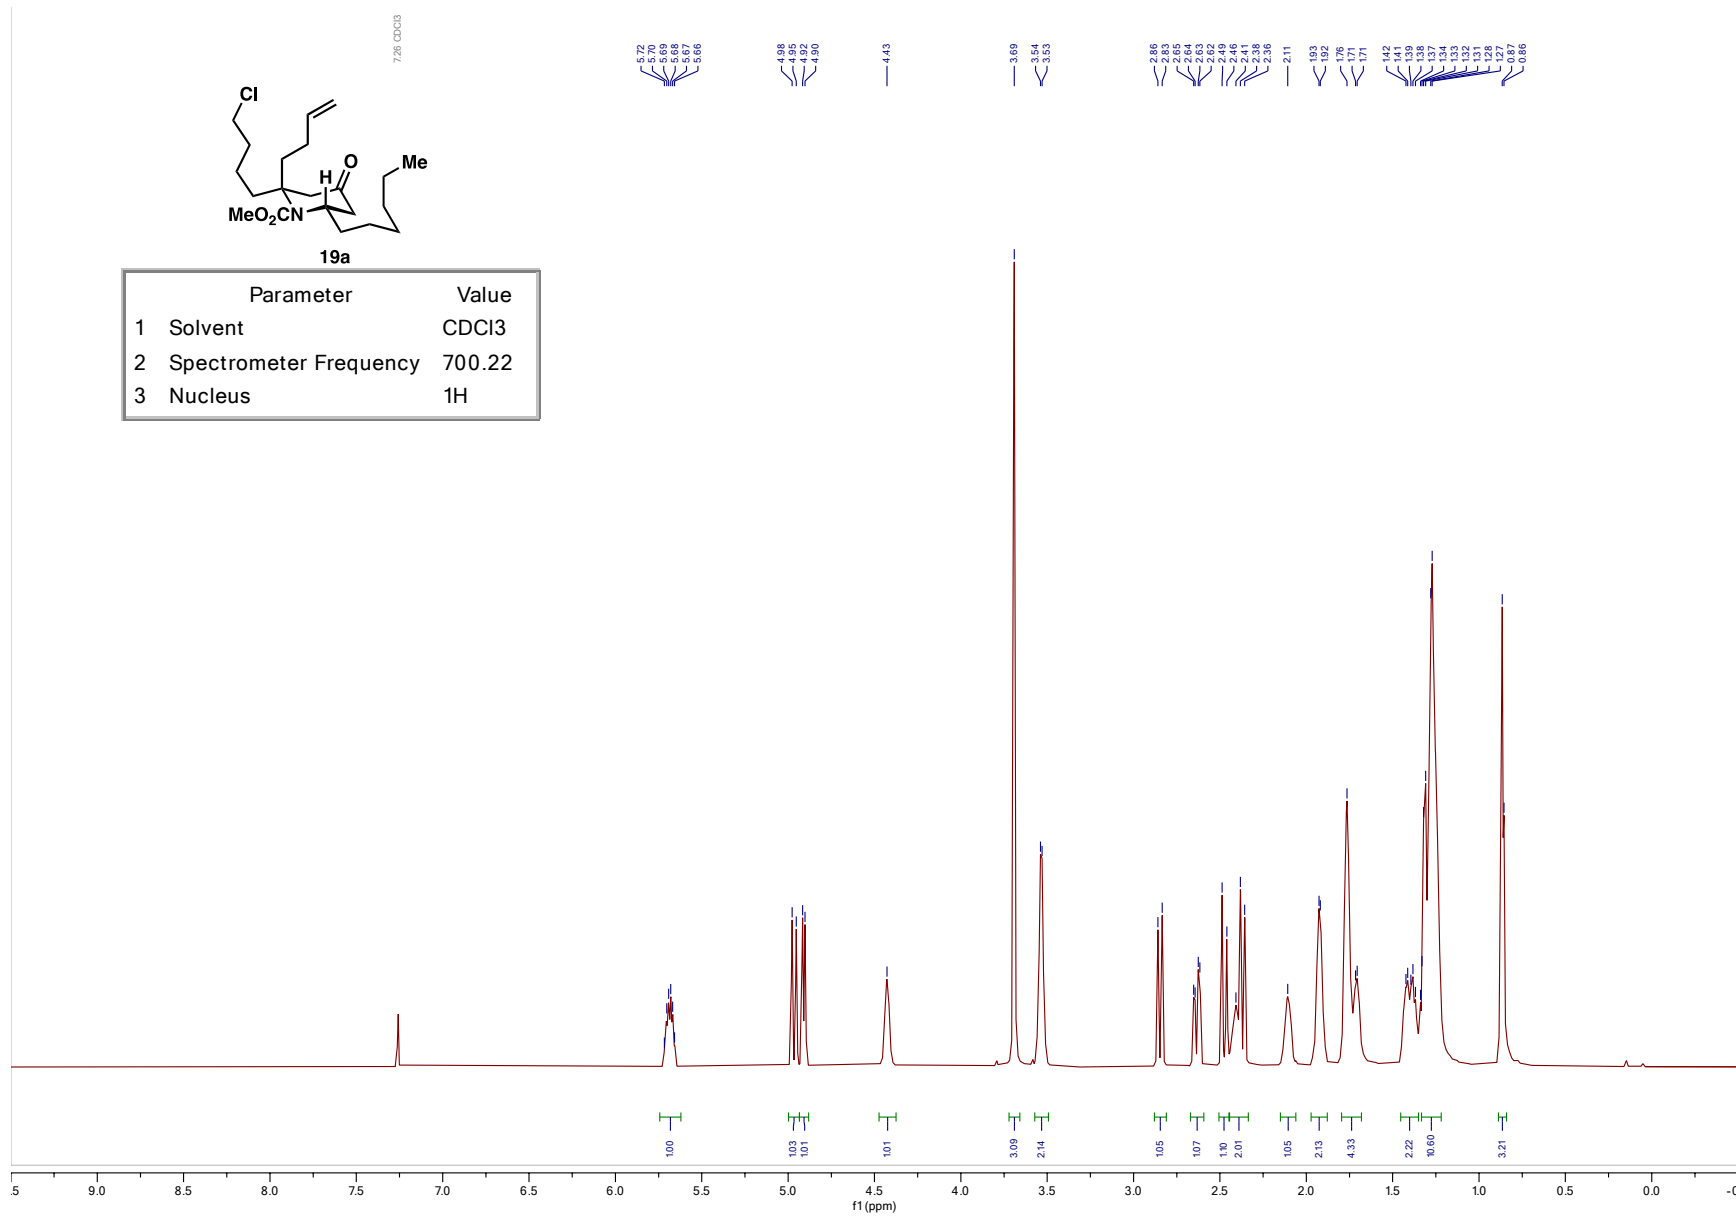

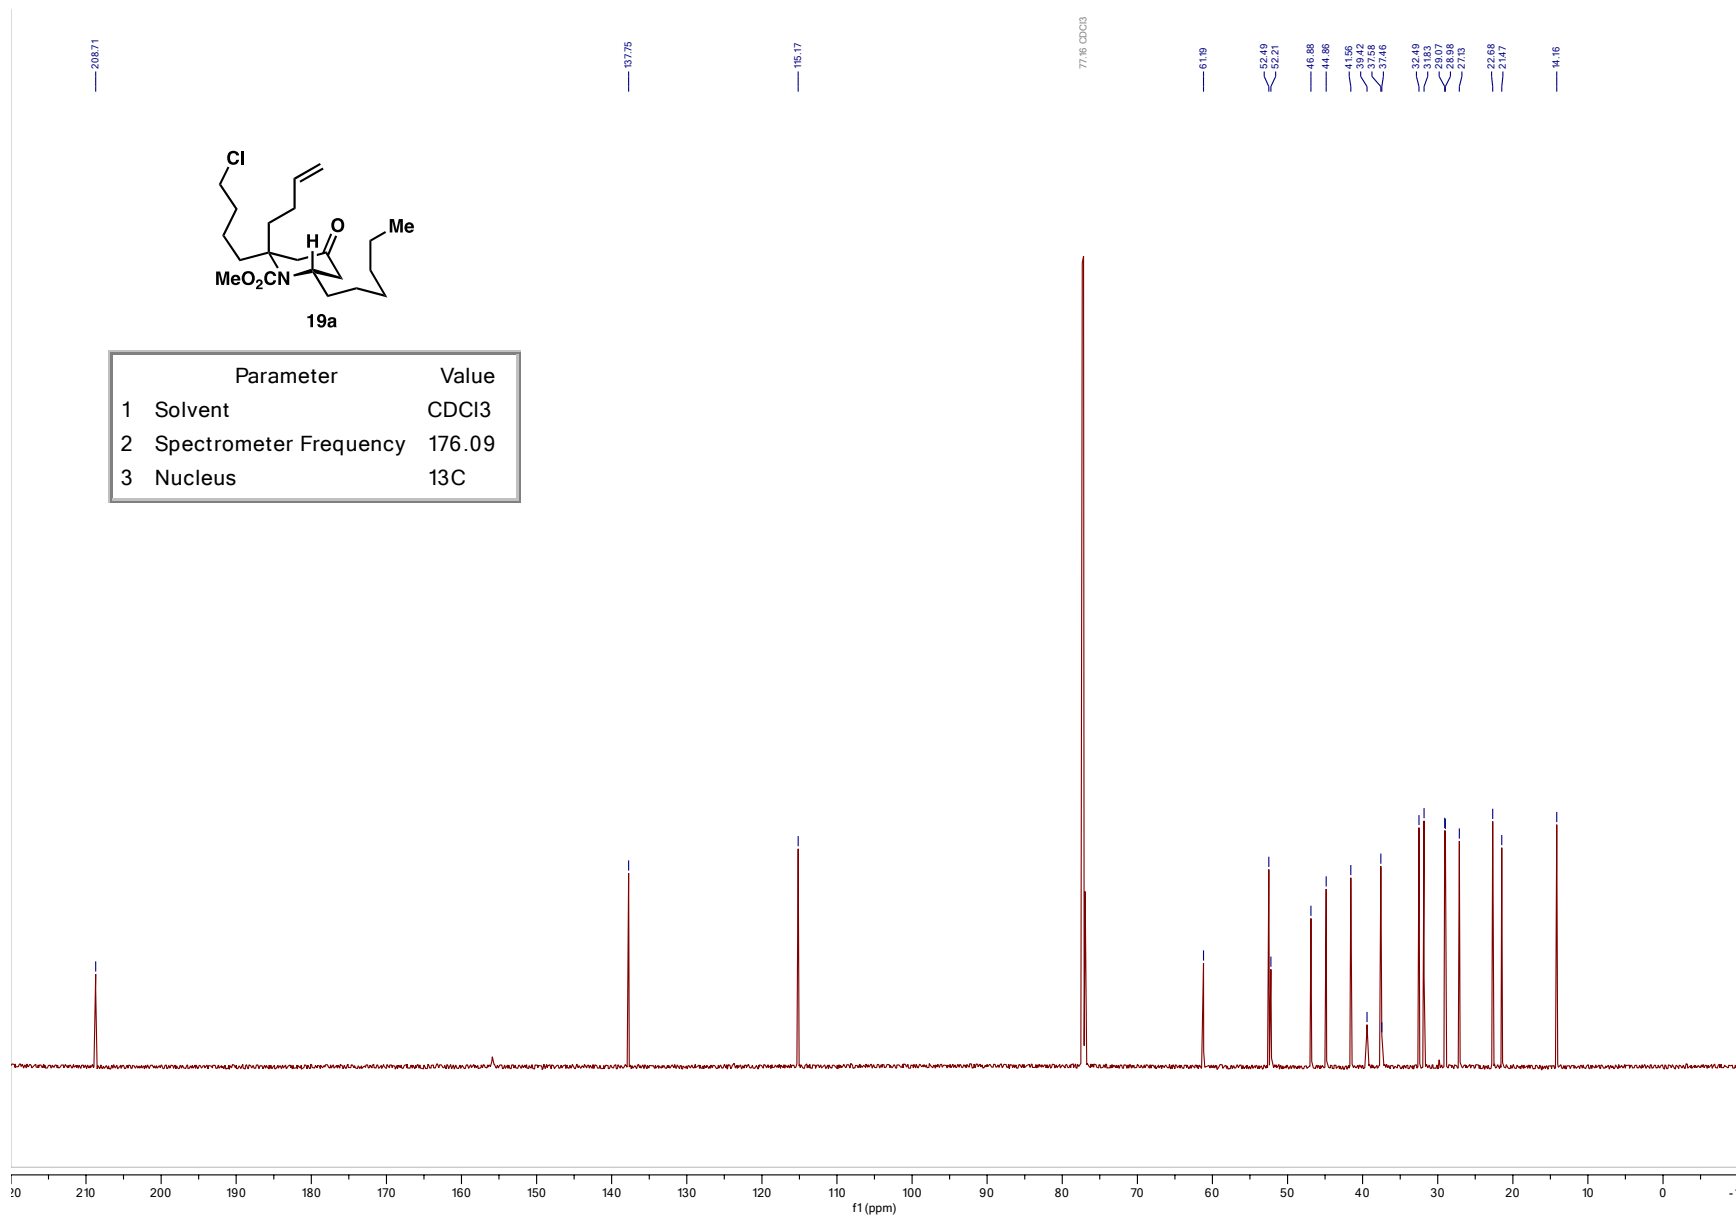

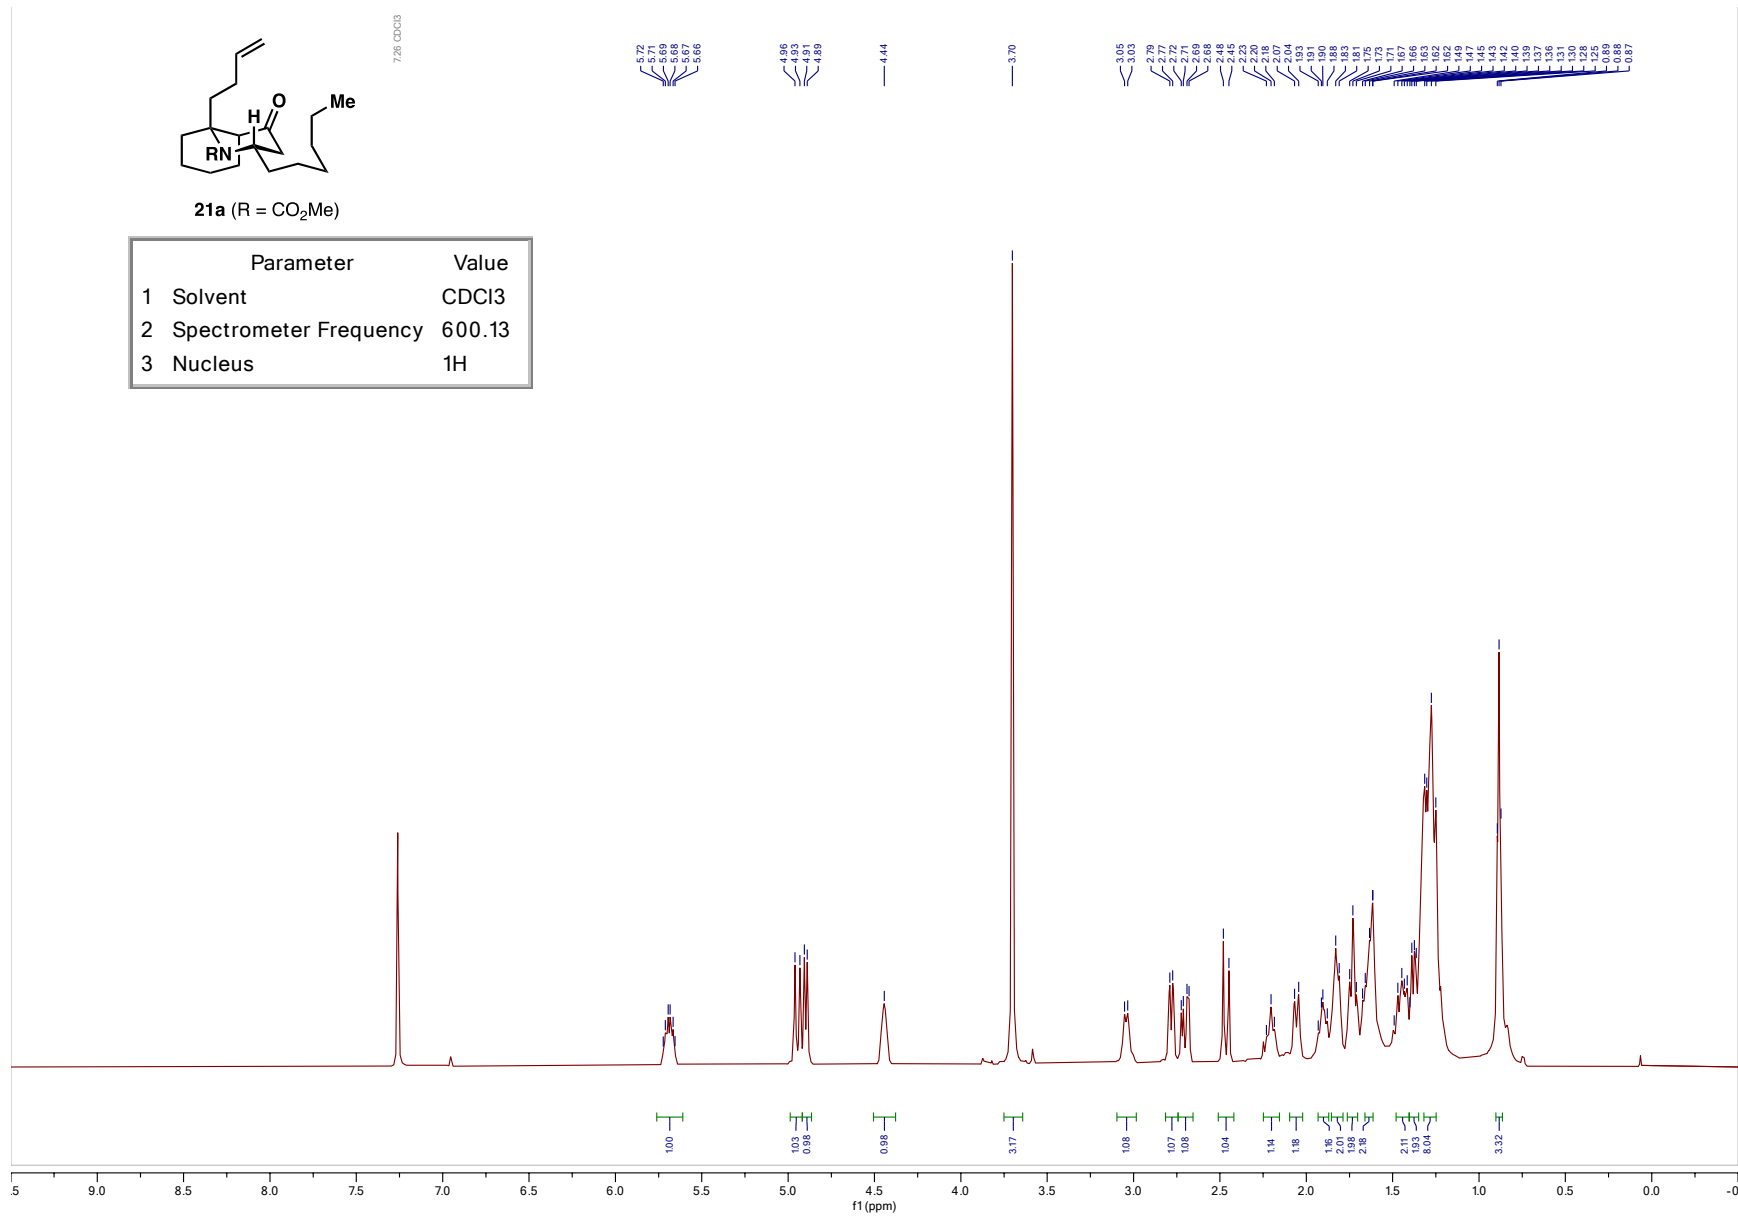

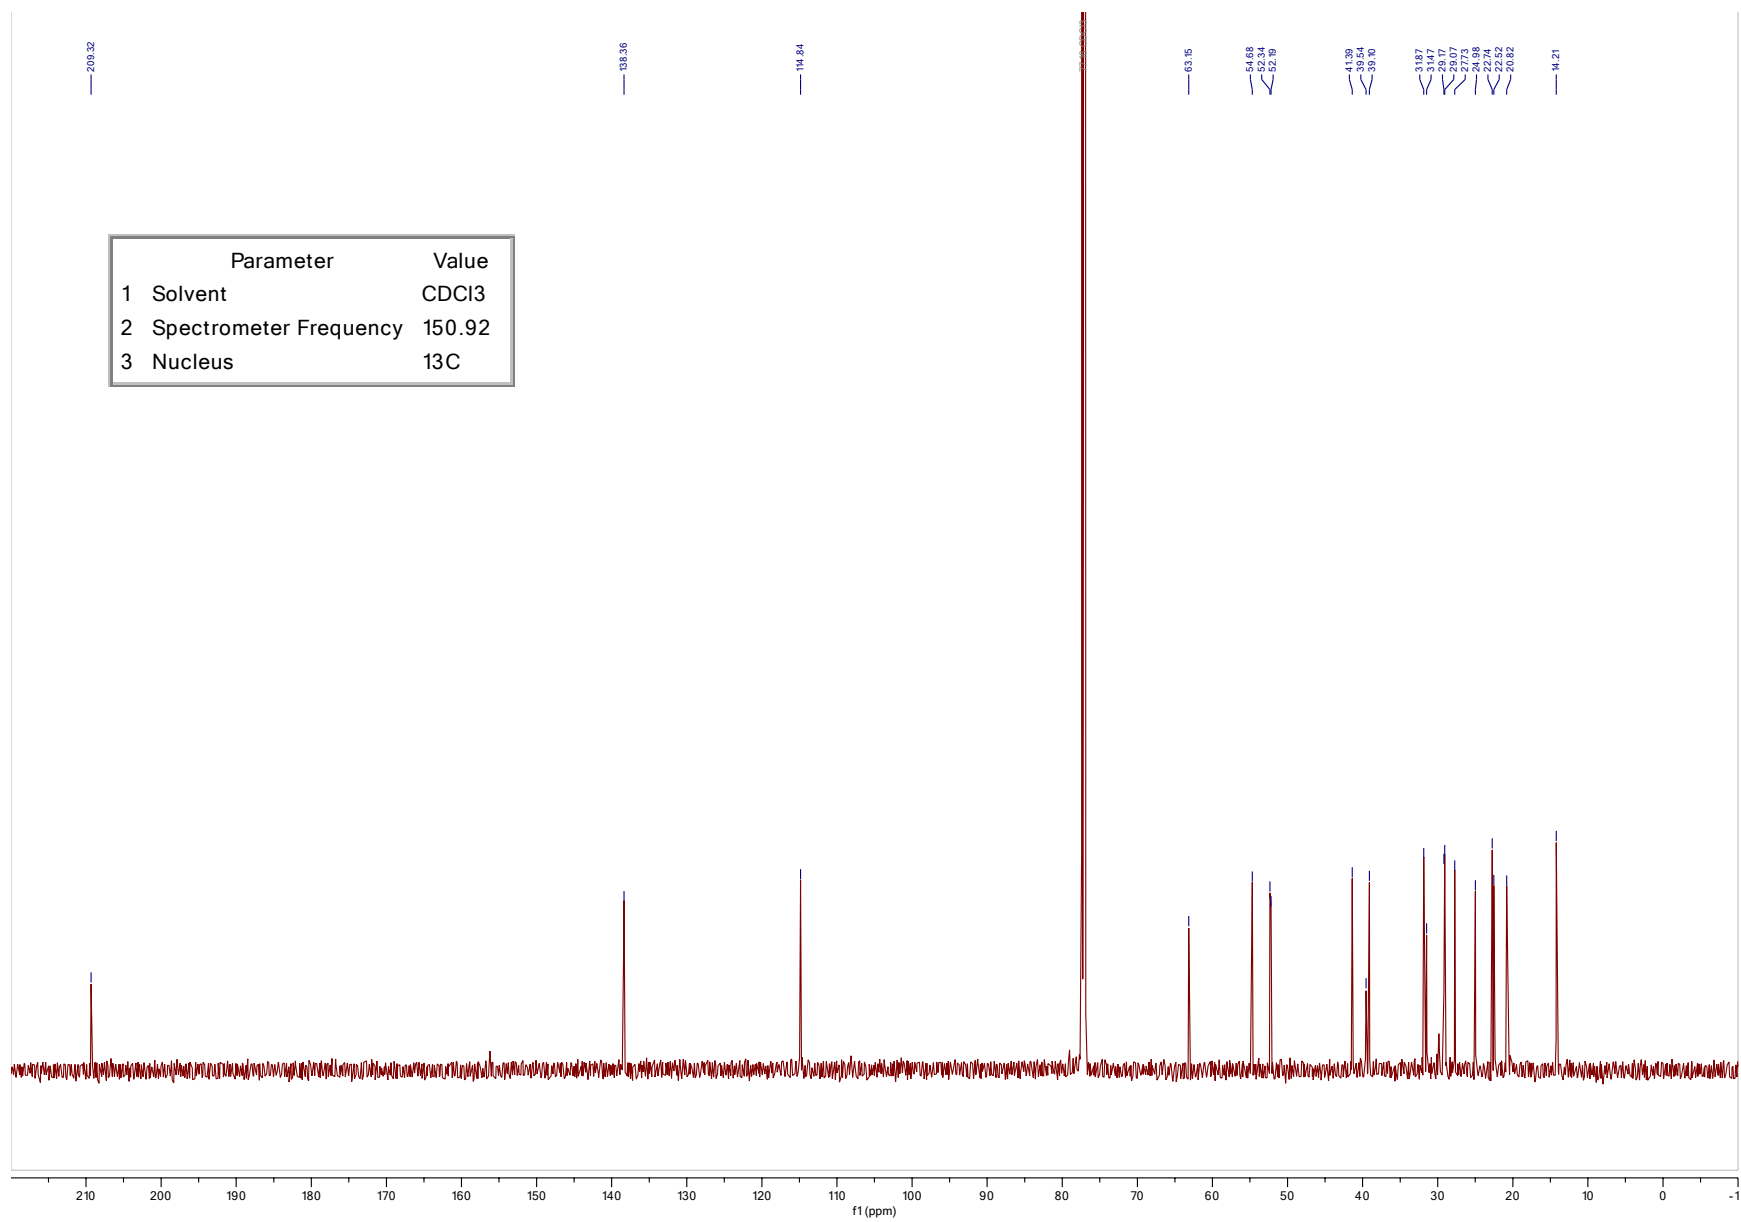

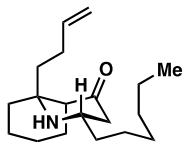

22a

| Parameter                | Value          |
|--------------------------|----------------|
| 1 Solvent                | CDCl3          |
| 2 Spectrometer Frequency | 700.22         |
| 3 Nucleus                | <sup>1</sup> H |

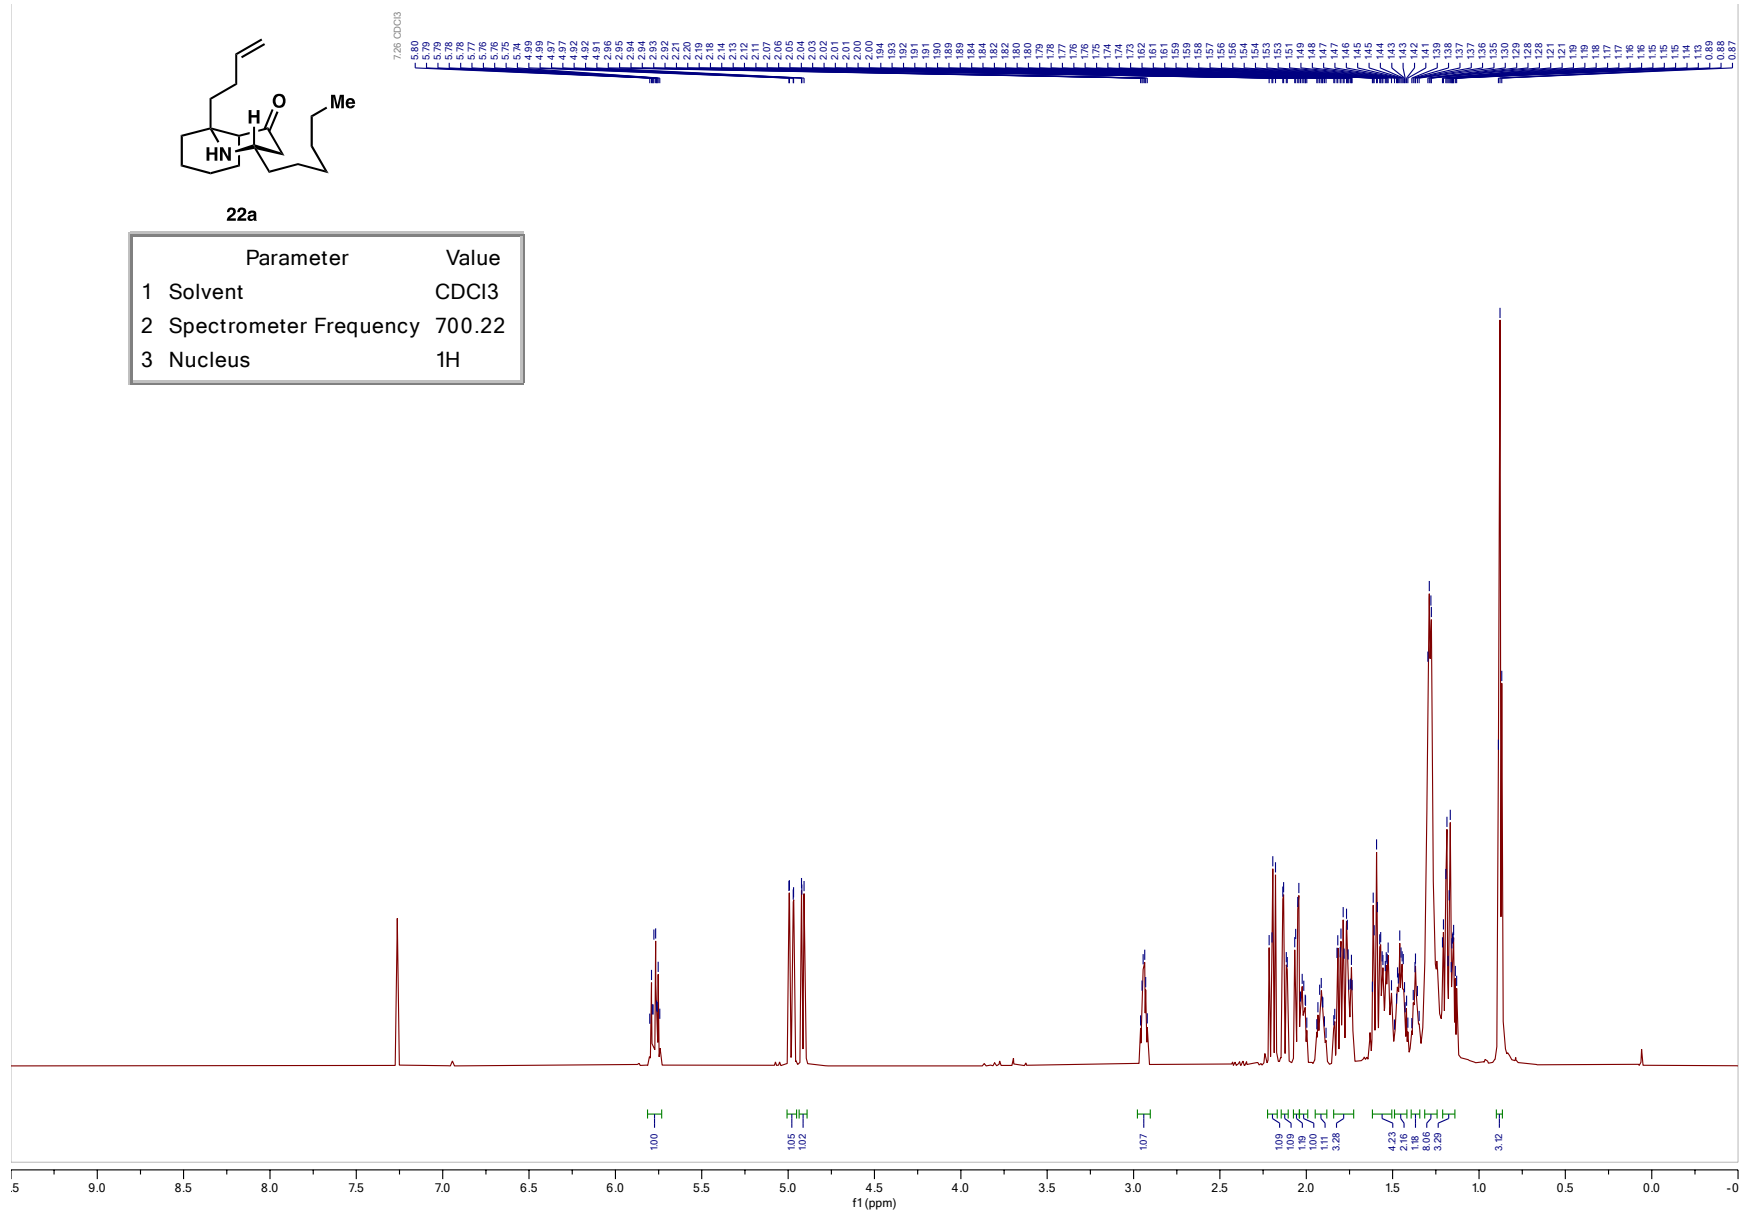



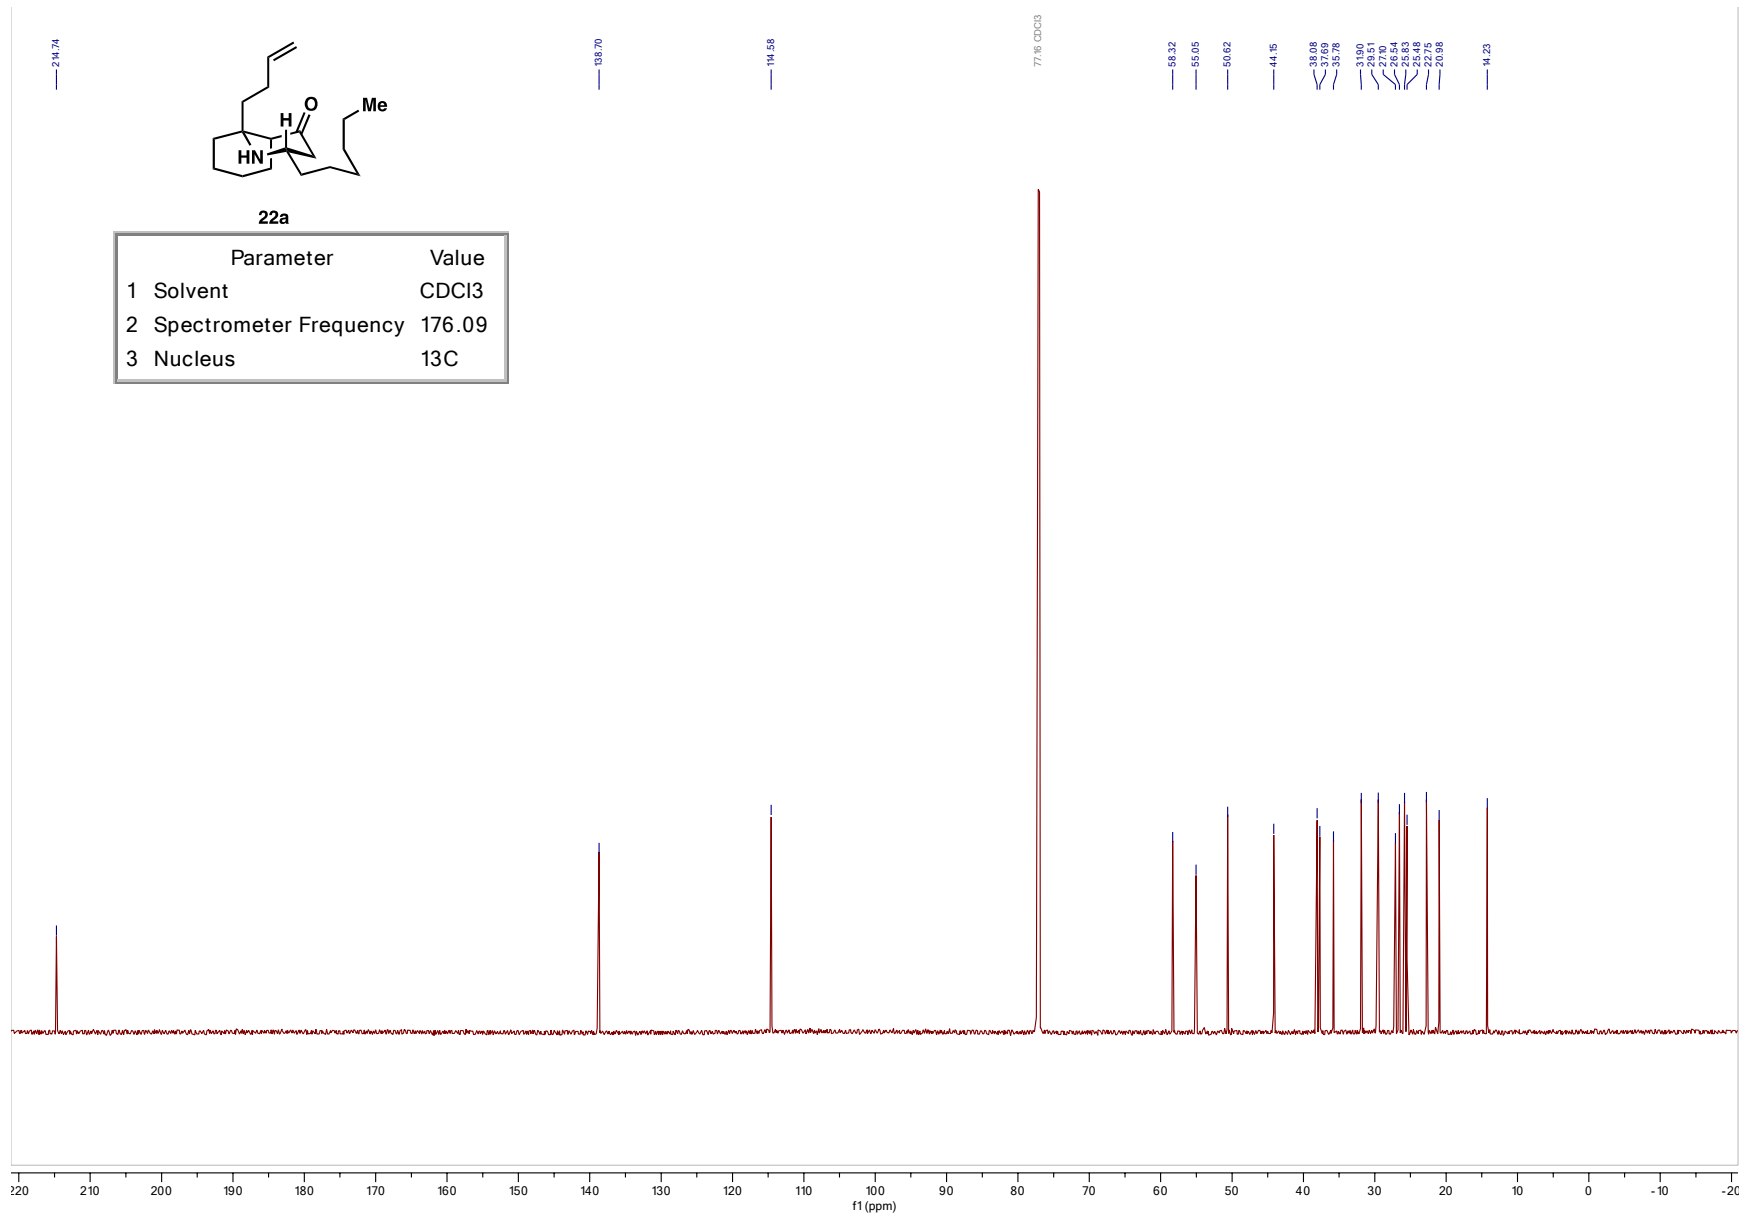

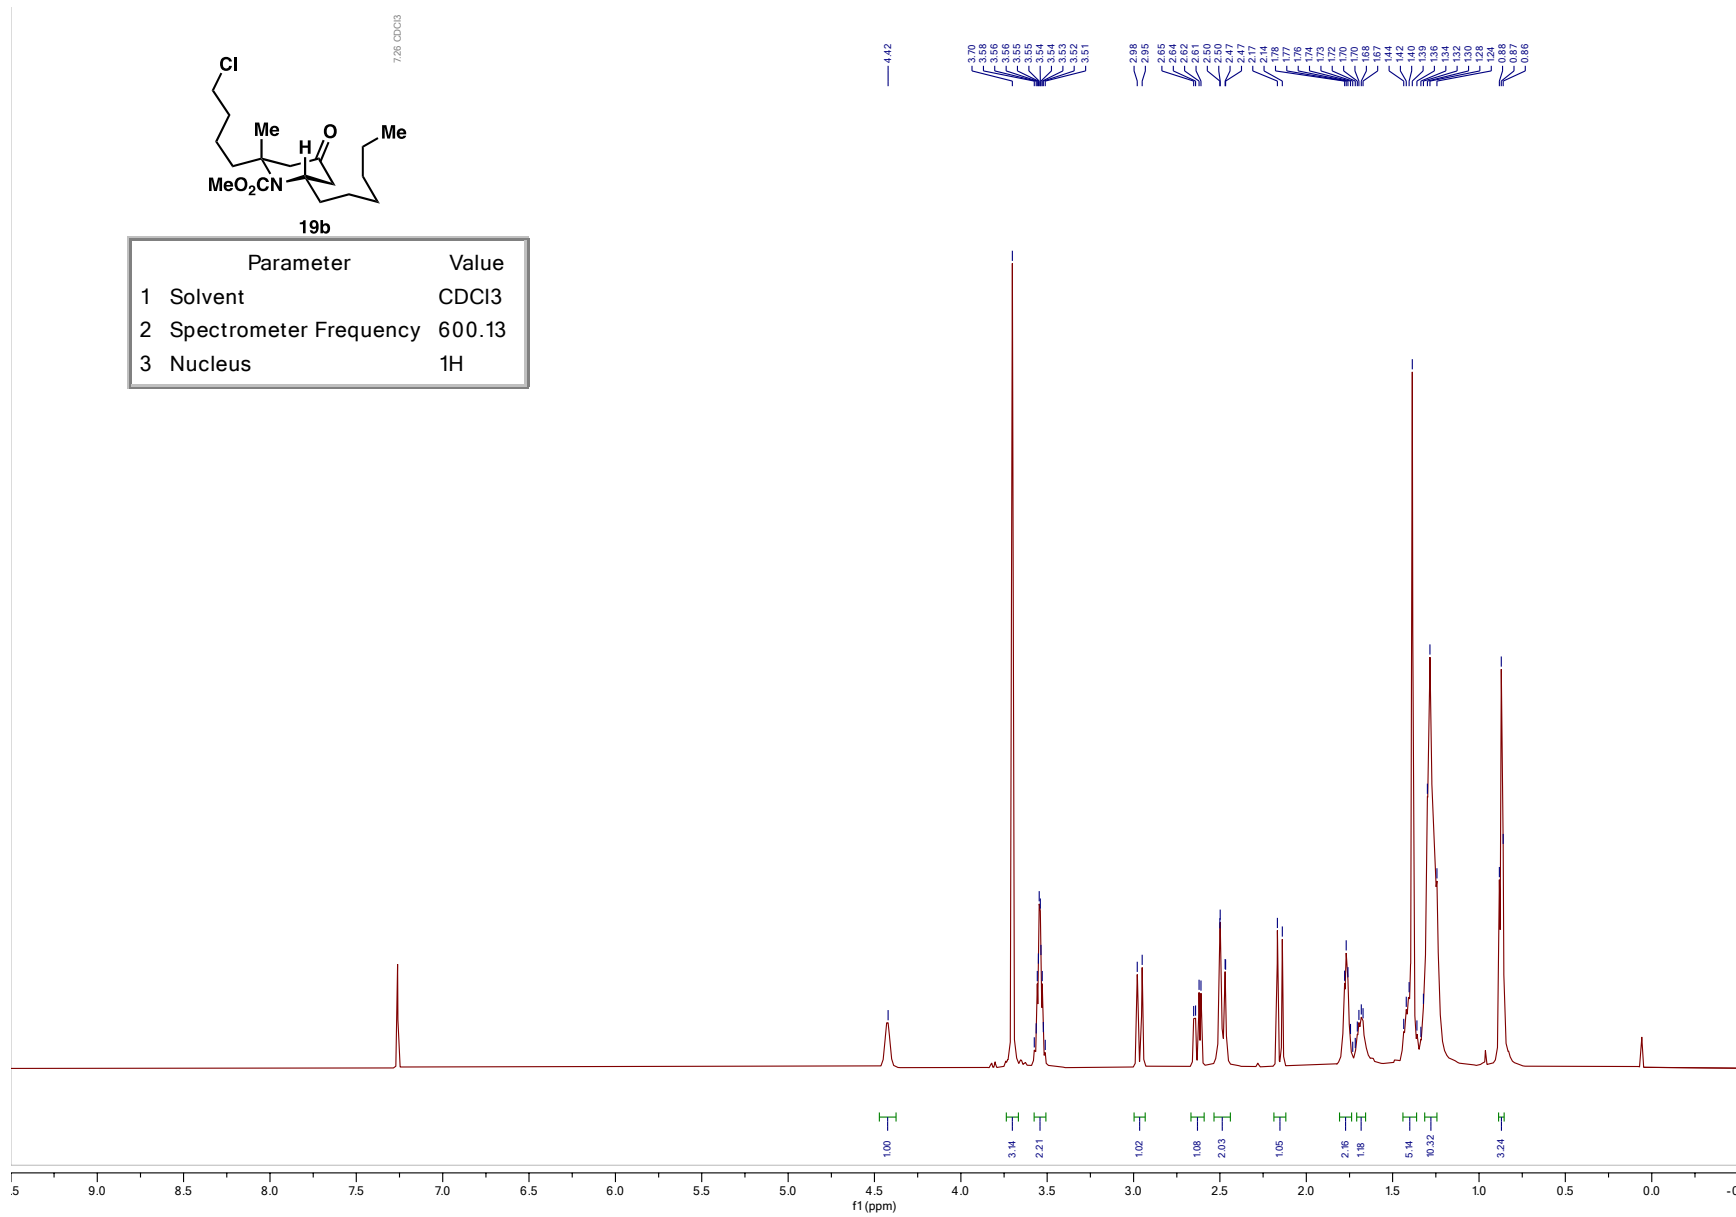

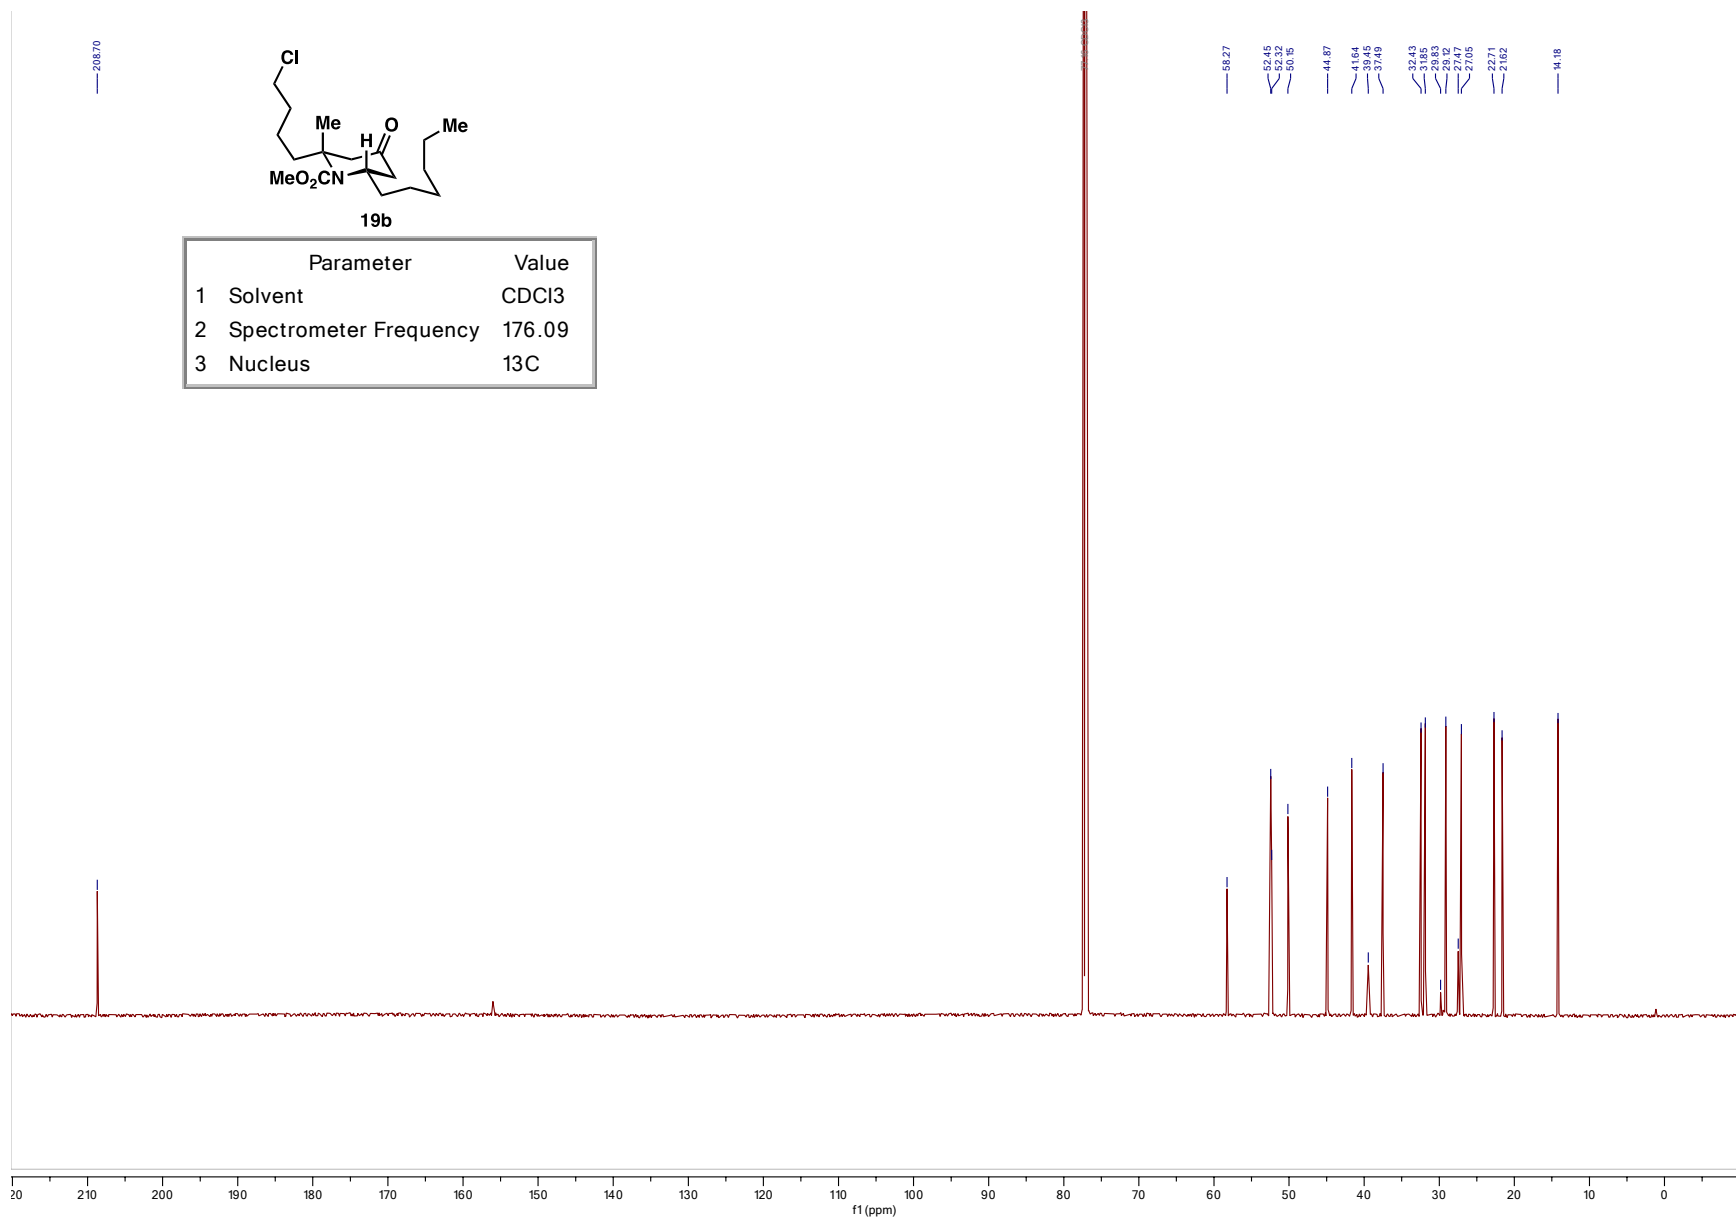

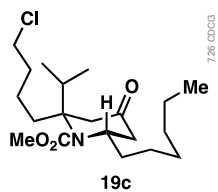

| Parameter                | Value             |
|--------------------------|-------------------|
| 1 Solvent                | CDCl <sub>3</sub> |
| 2 Spectrometer Frequency | 700.22            |
| 3 Nucleus                | <sup>1</sup> H    |

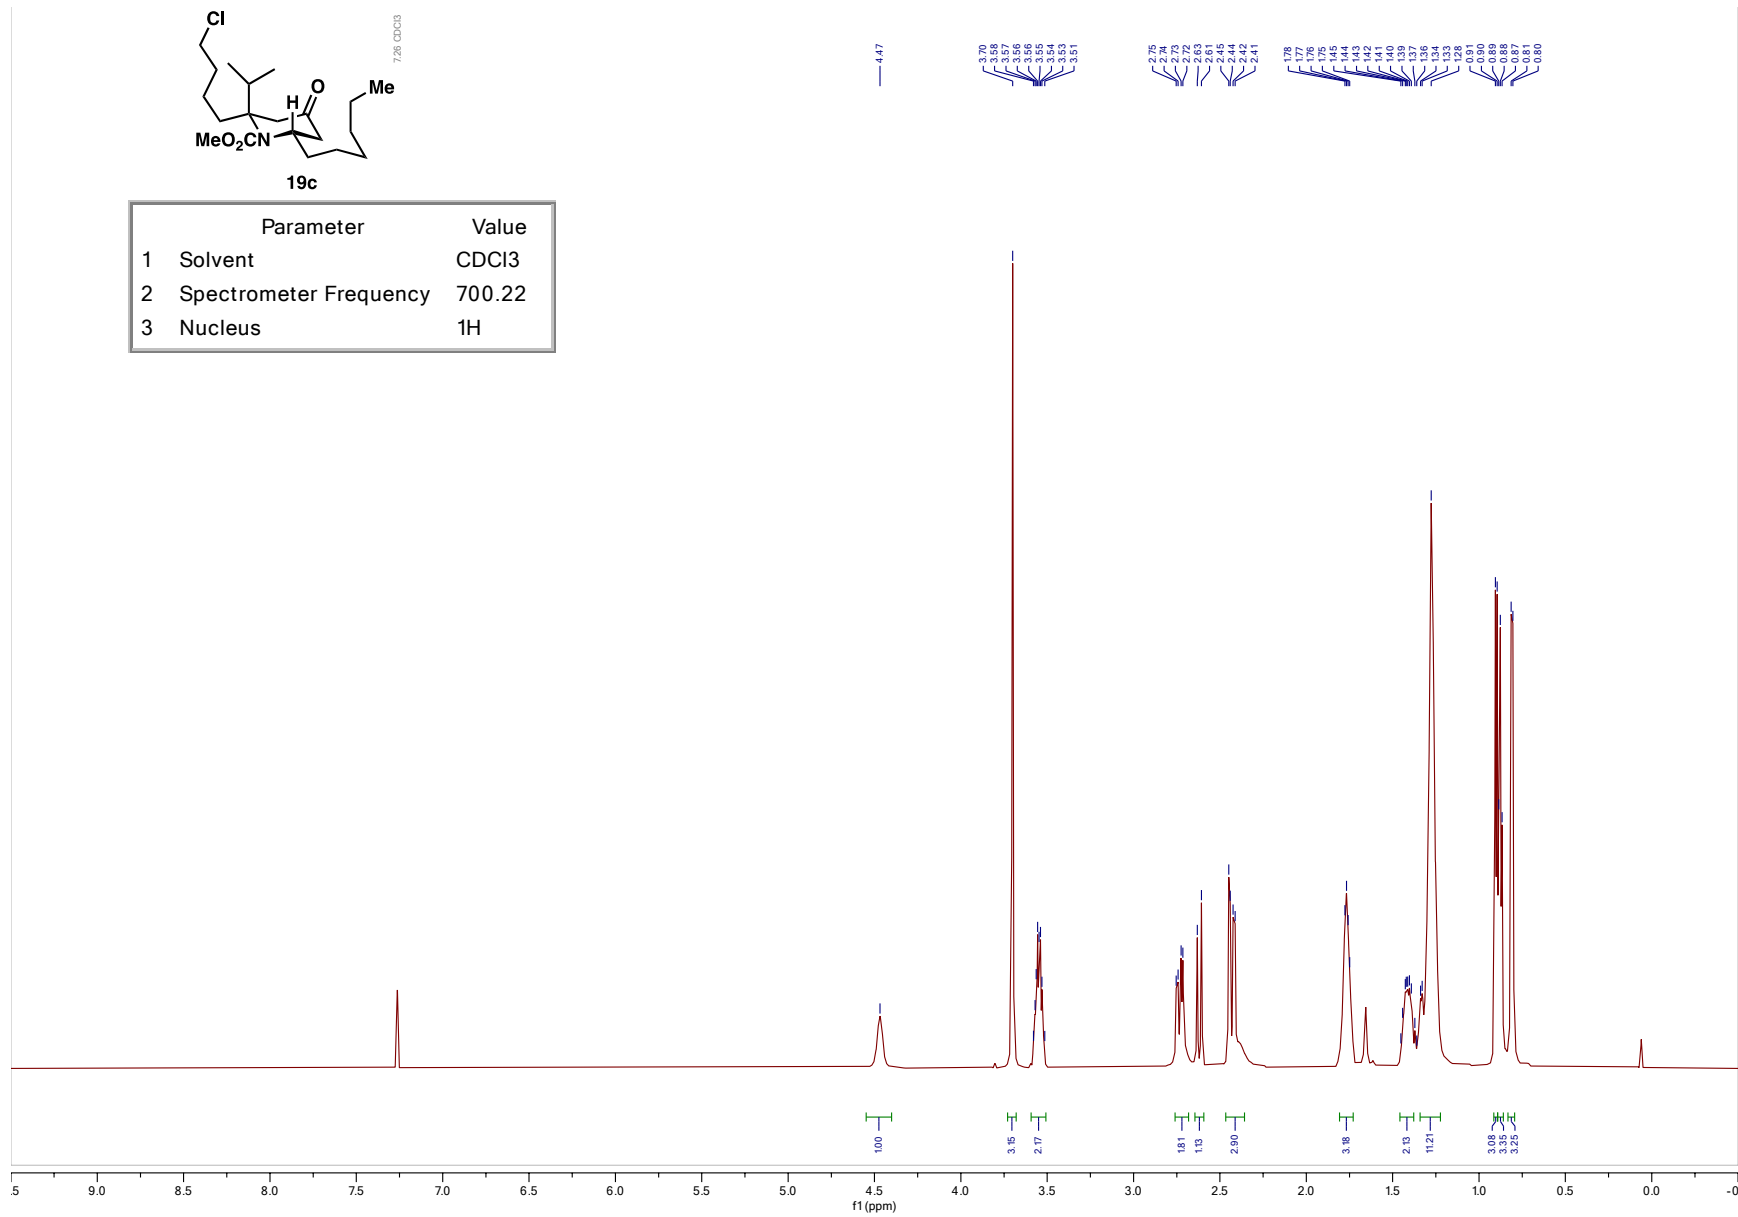

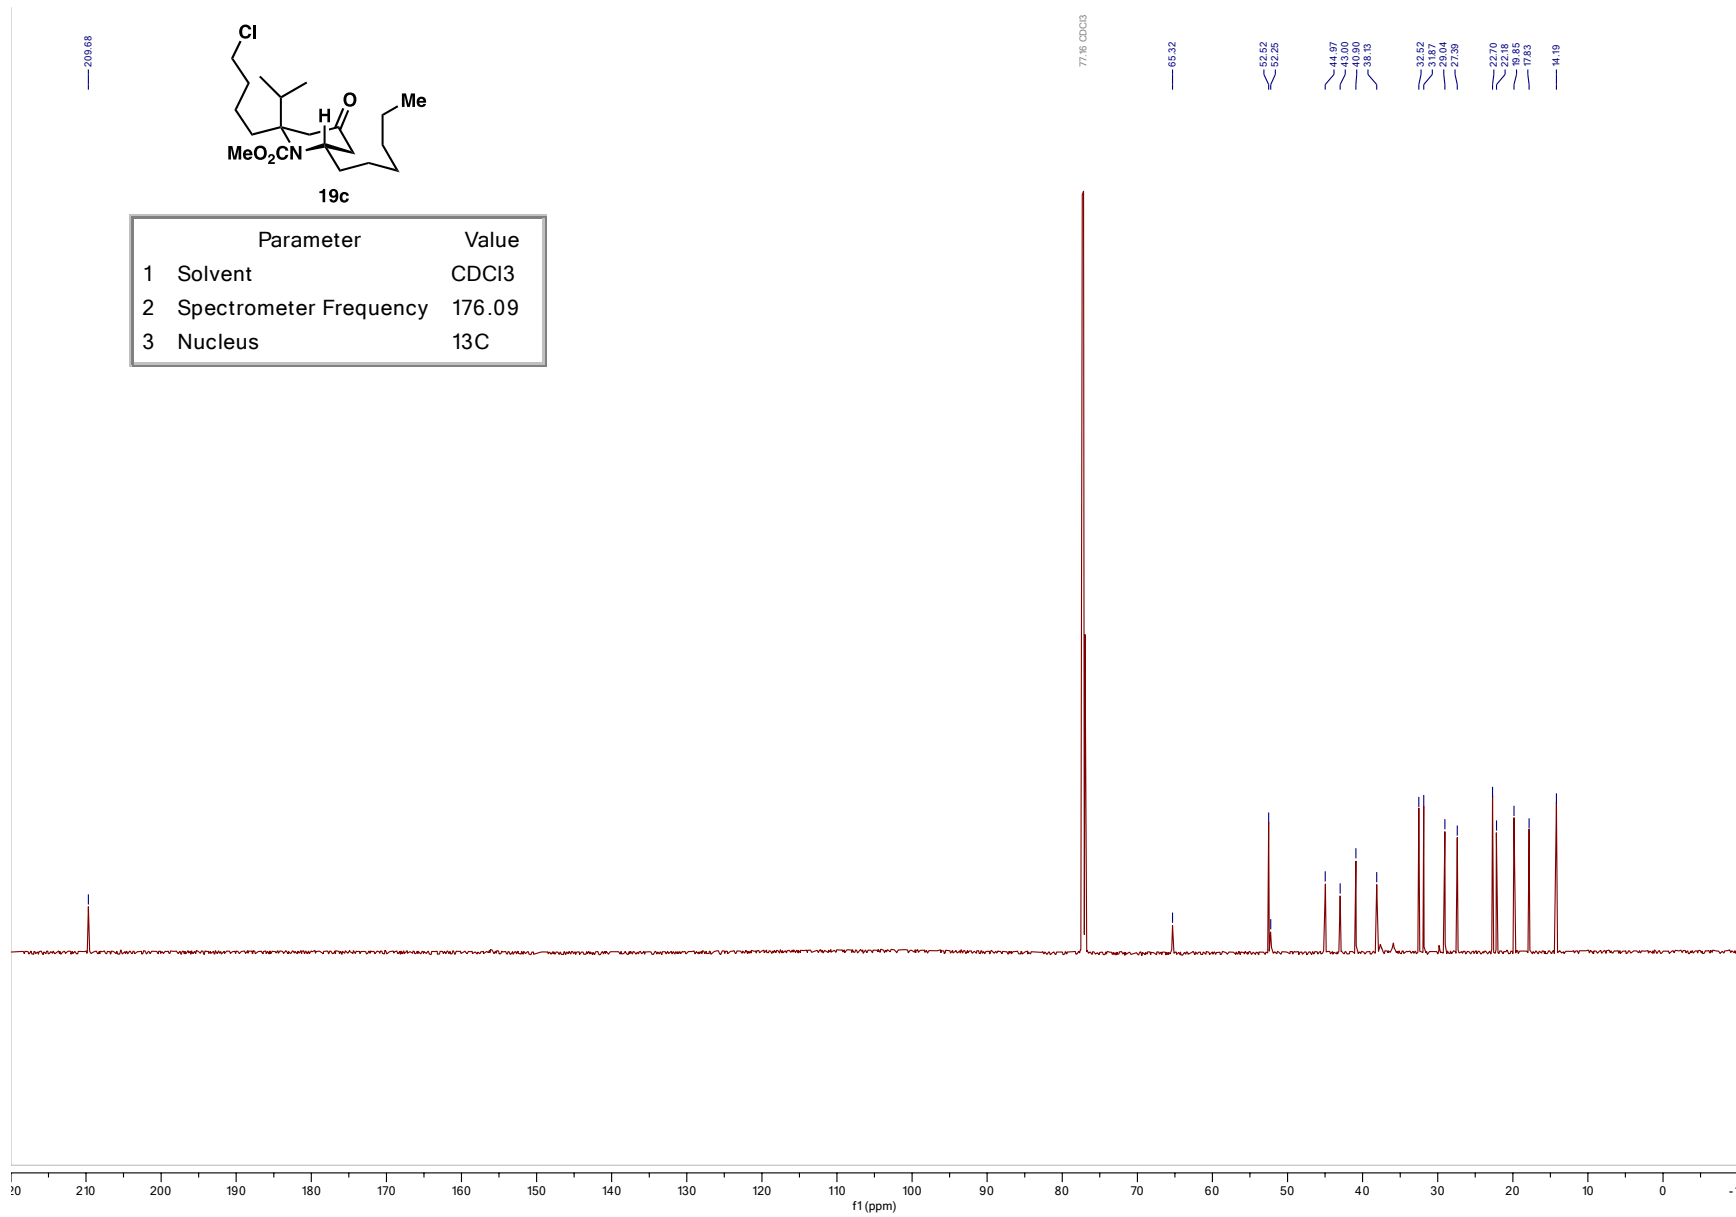

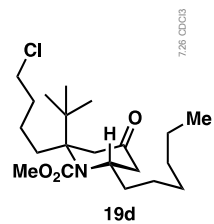

| Parameter                | Value             |
|--------------------------|-------------------|
| 1 Solvent                | CDCl <sub>3</sub> |
| 2 Spectrometer Frequency | 600.13            |
| 3 Nucleus                | <sup>1</sup> H    |

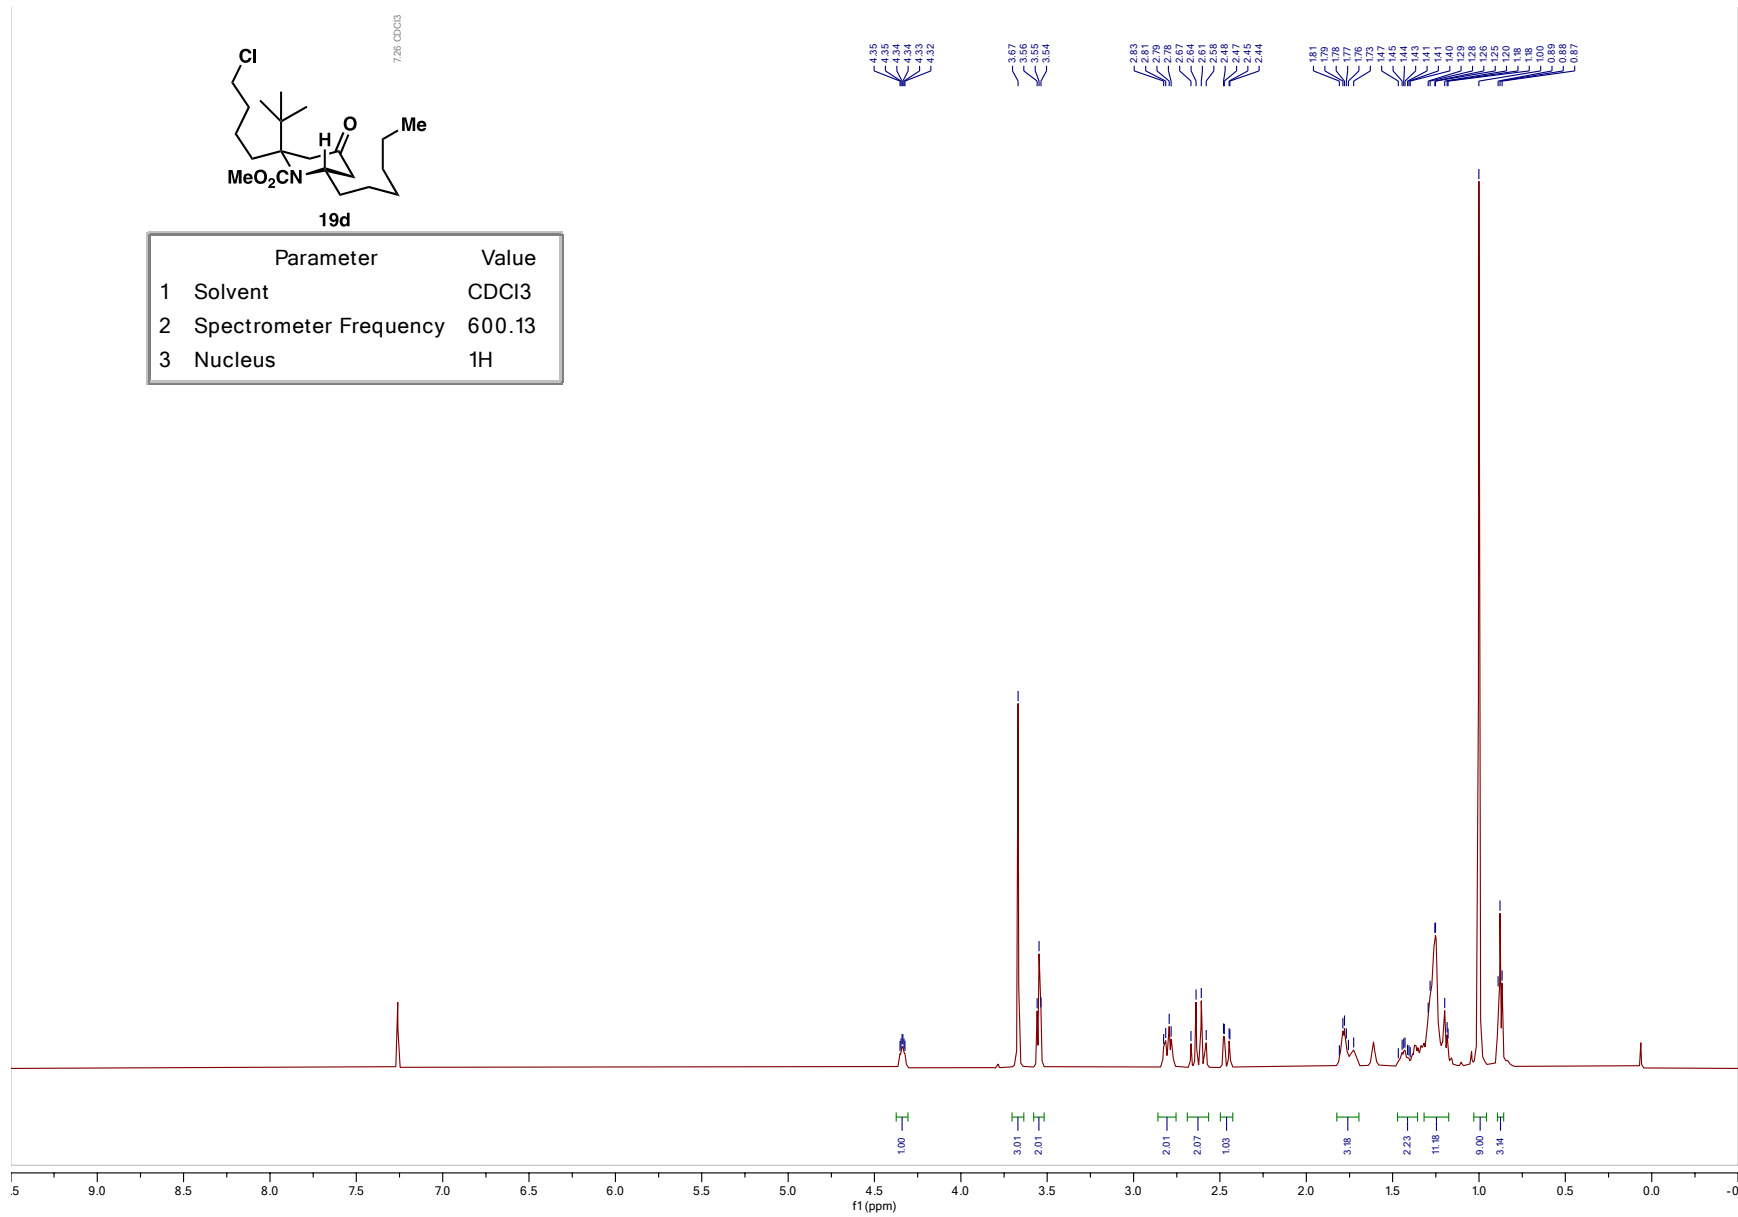



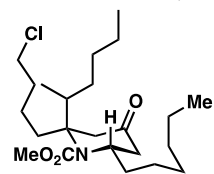

19e

| Parameter                | Value             |
|--------------------------|-------------------|
| 1 Solvent                | CDCl <sub>3</sub> |
| 2 Spectrometer Frequency | 600.13            |
| 3 Nucleus                | <sup>1</sup> H    |

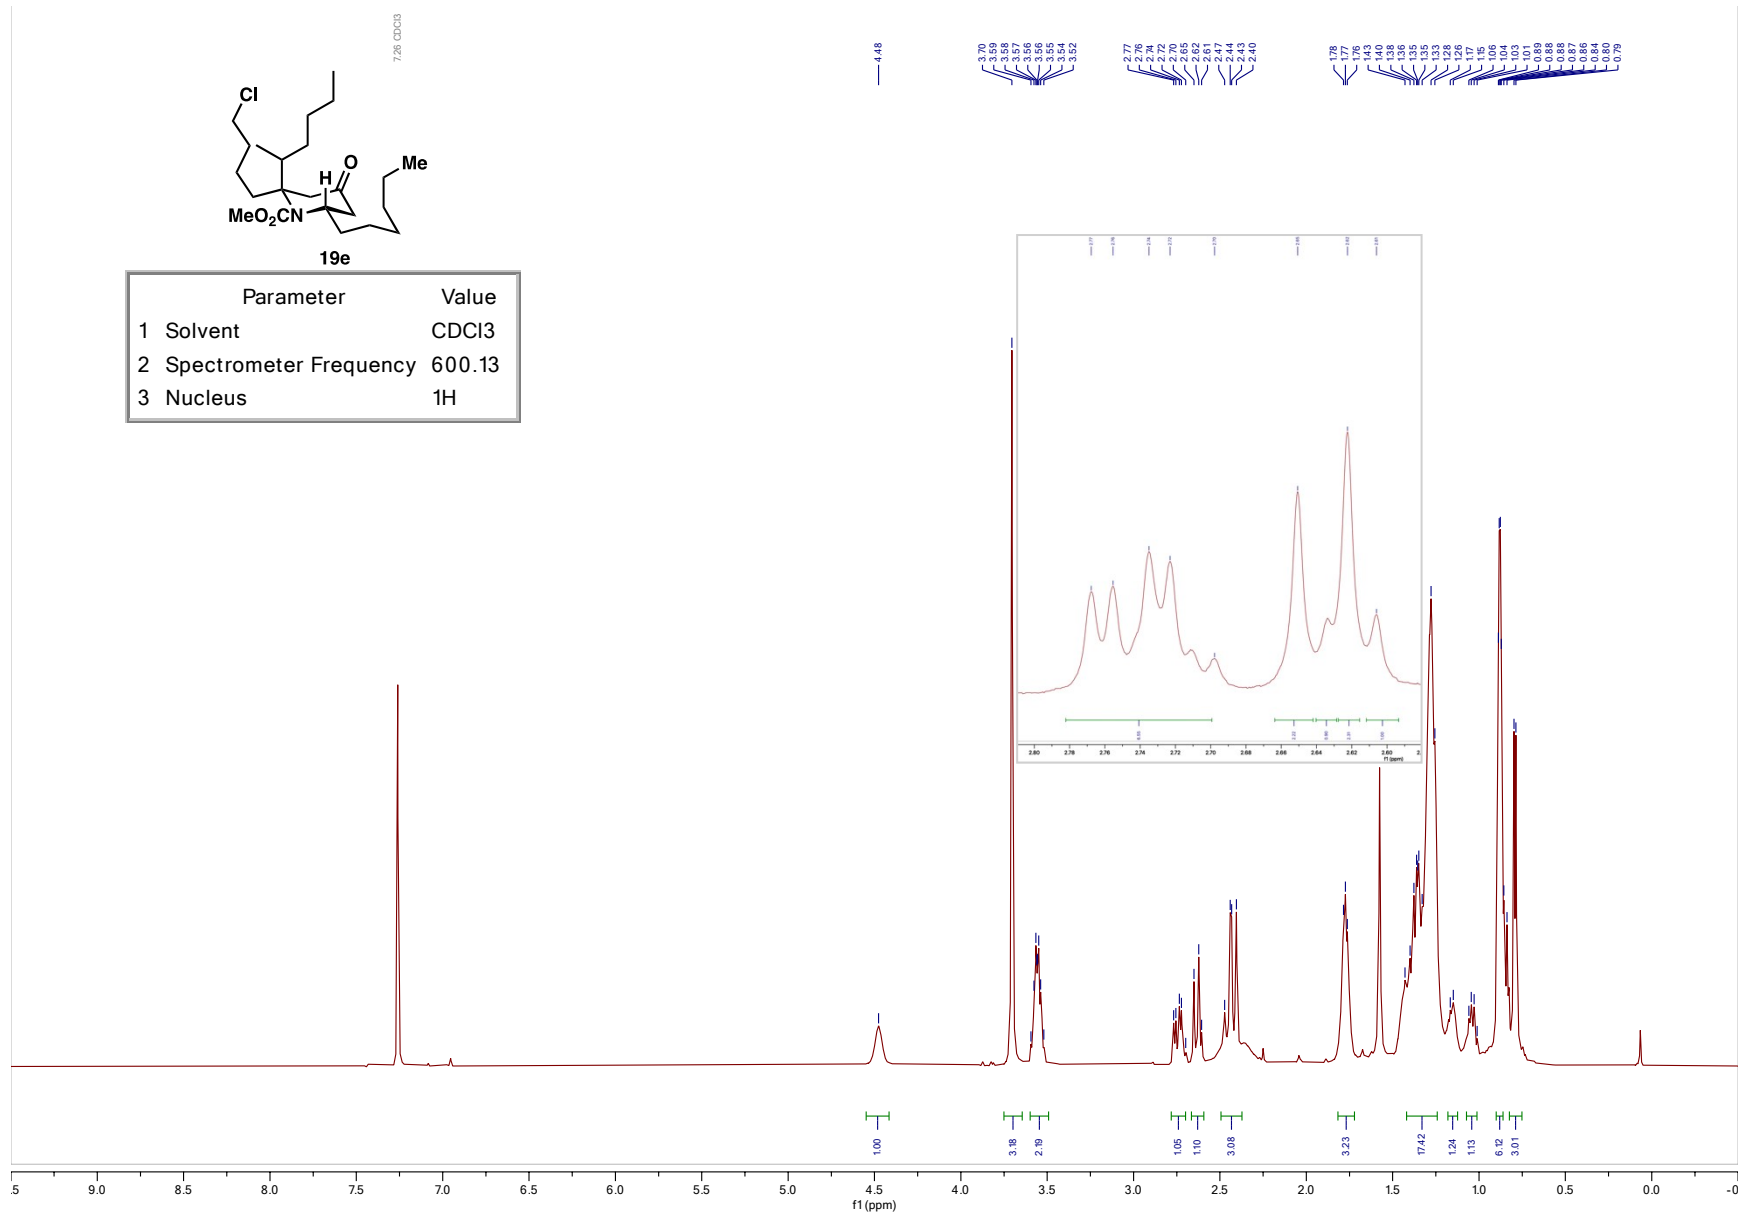



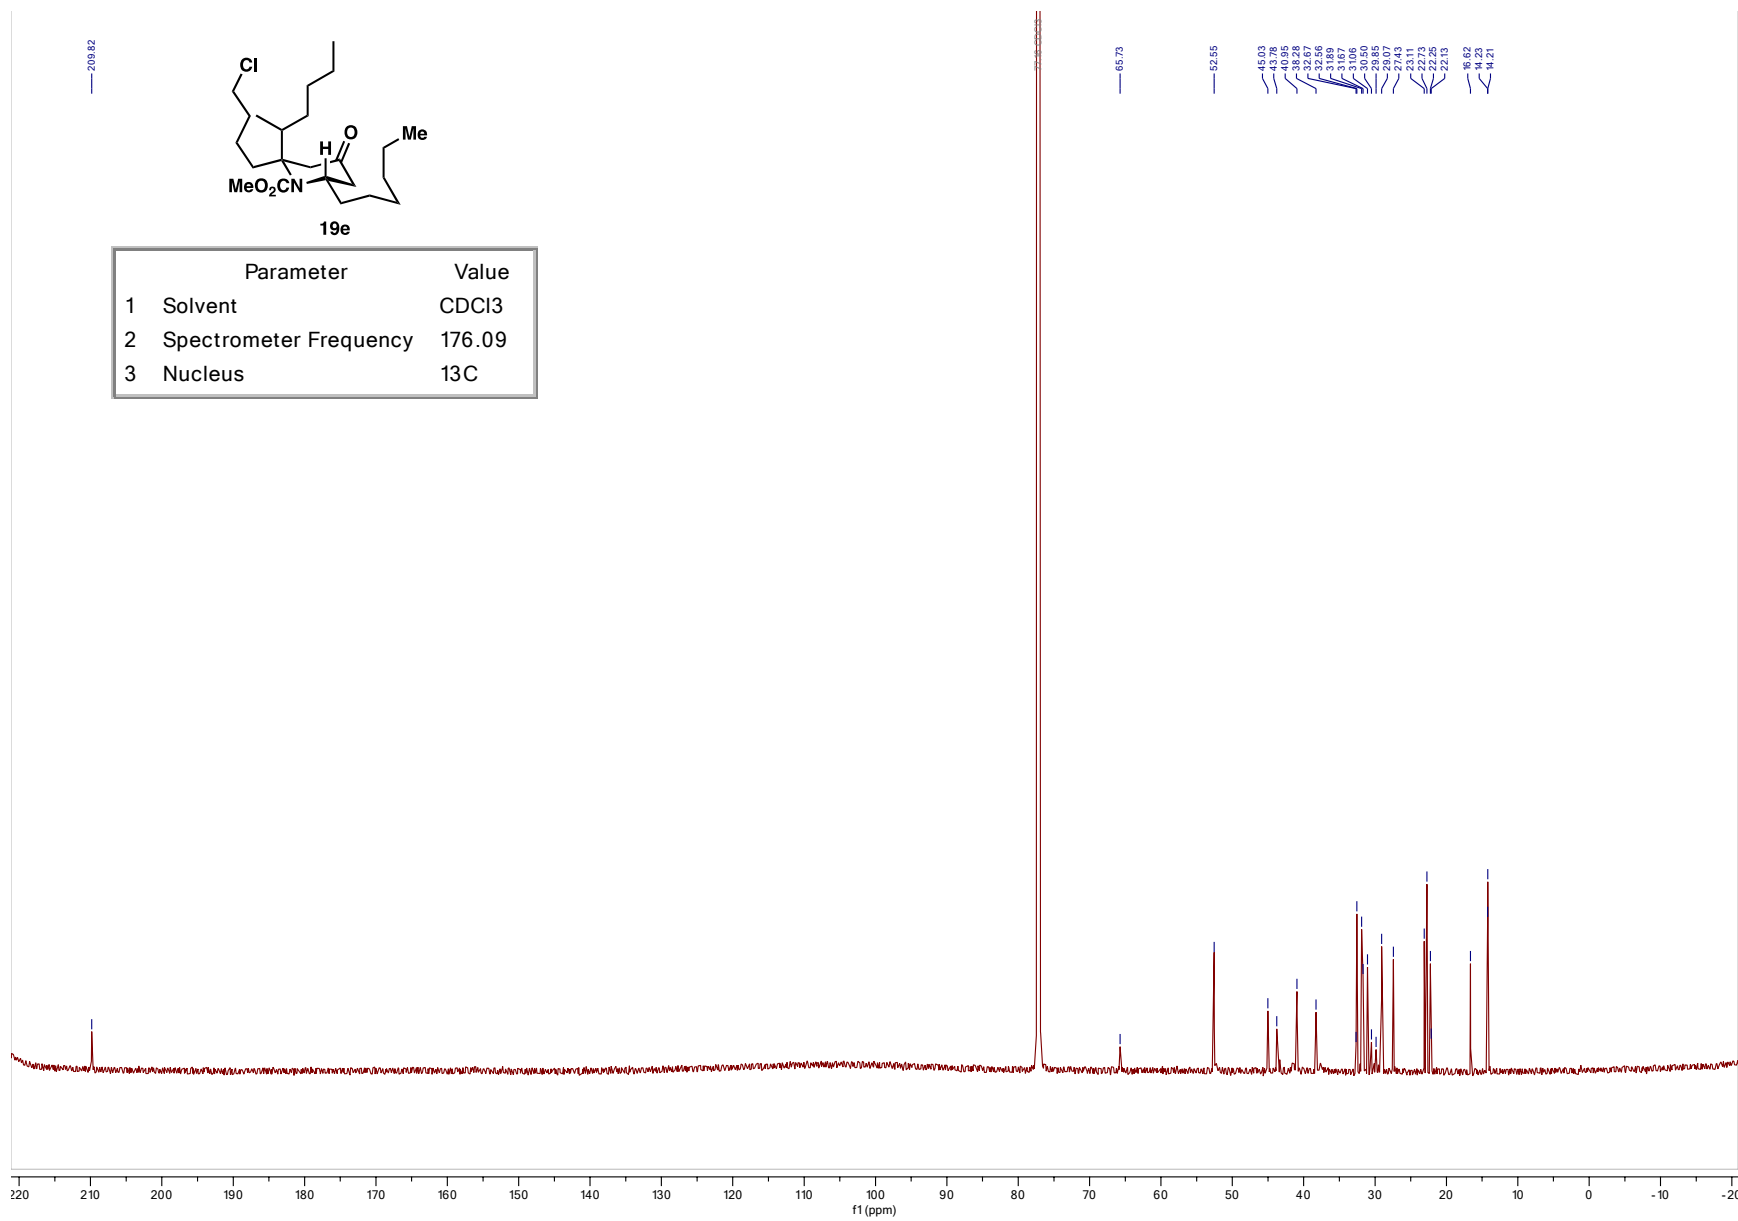

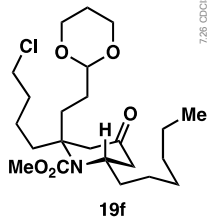

| Parameter                | Value          |
|--------------------------|----------------|
| 1 Solvent                | CDCl3          |
| 2 Spectrometer Frequency | 600.13         |
| 3 Nucleus                | <sup>1</sup> H |

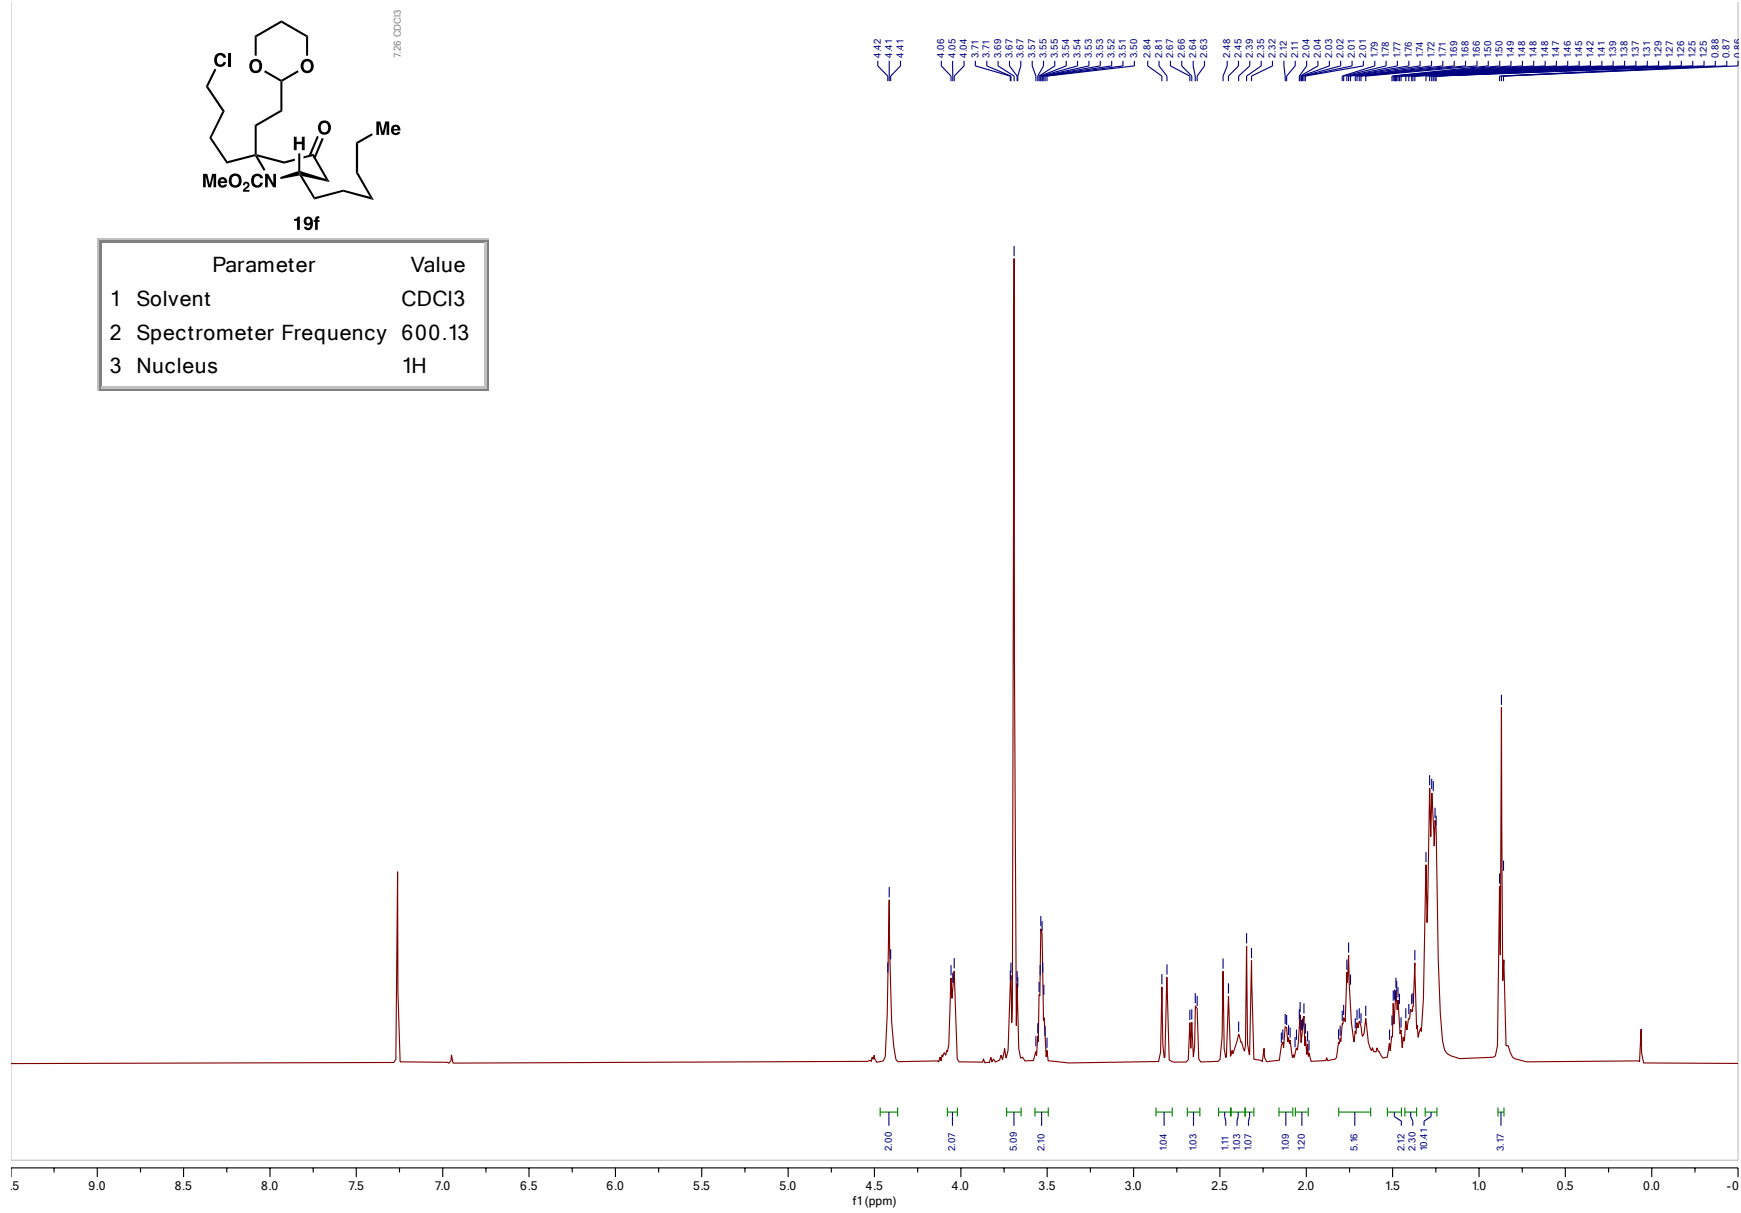

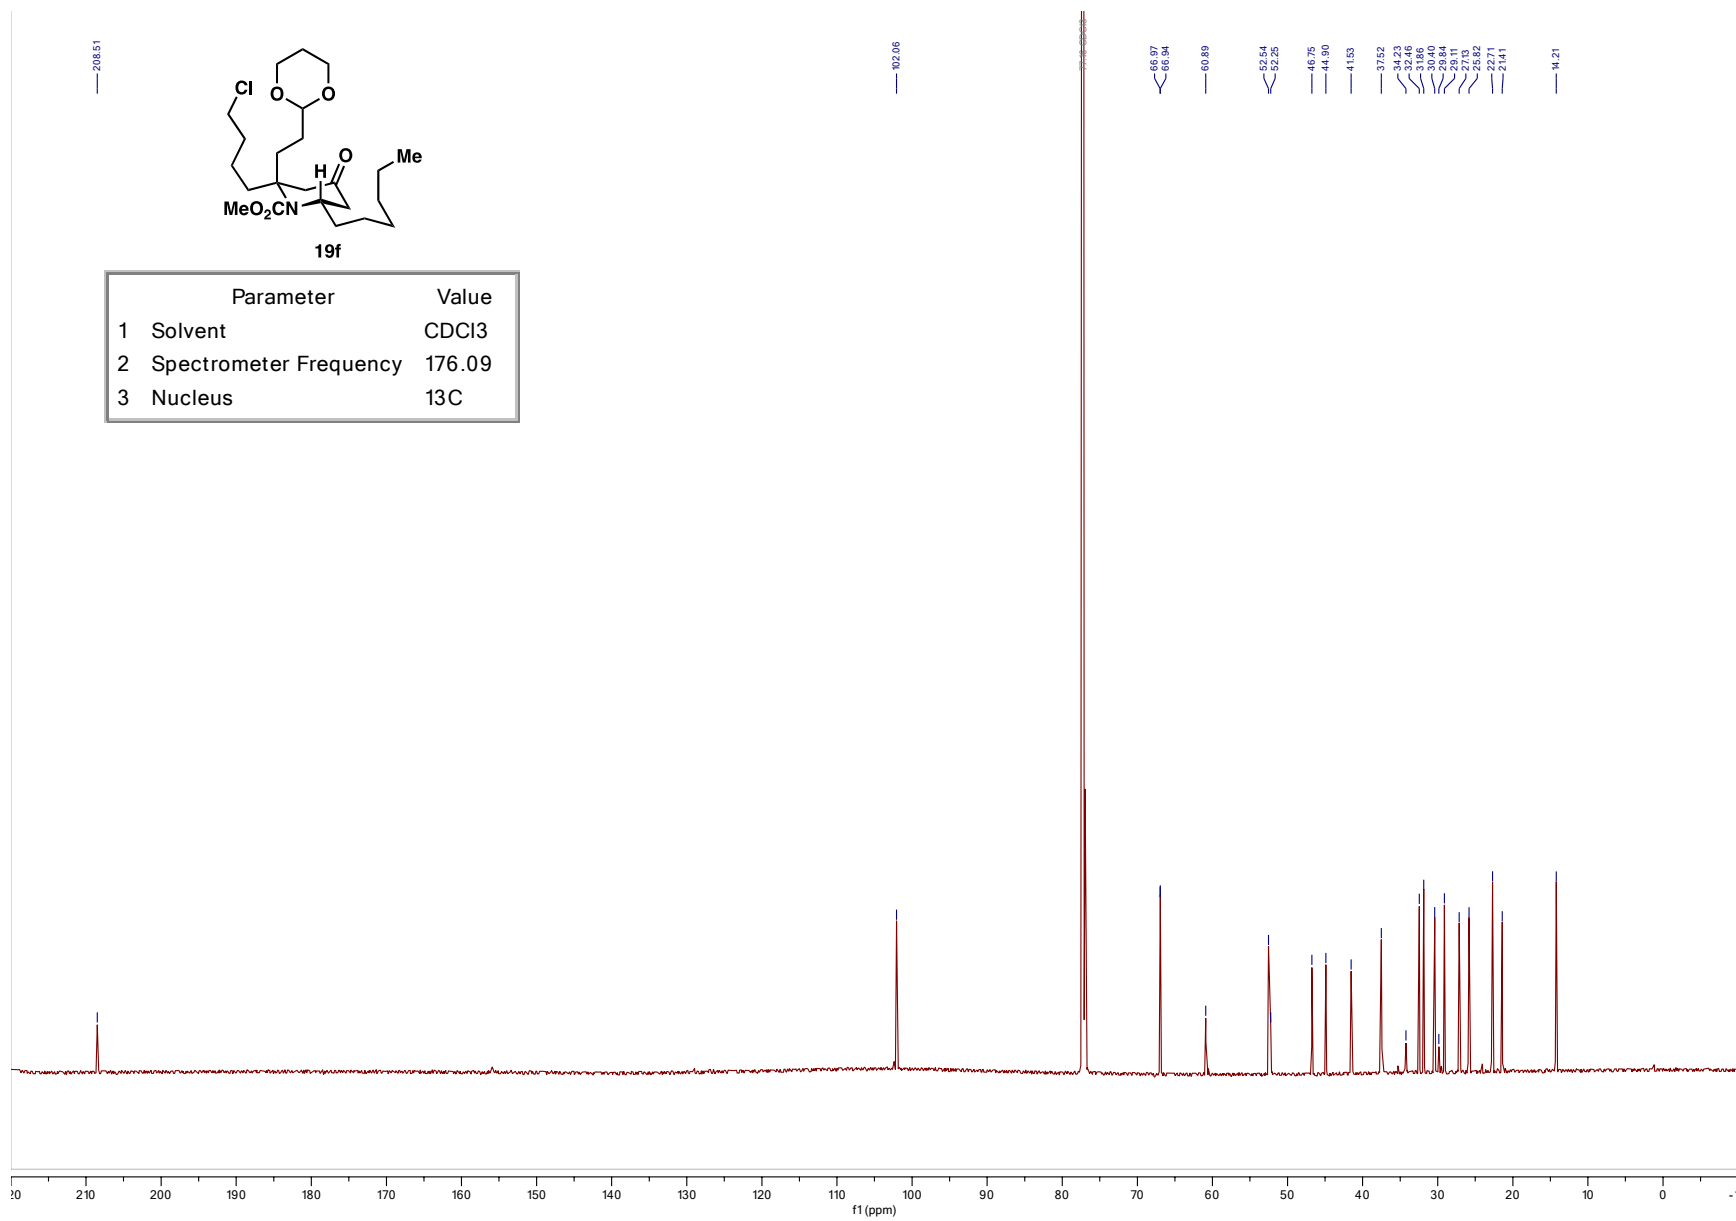

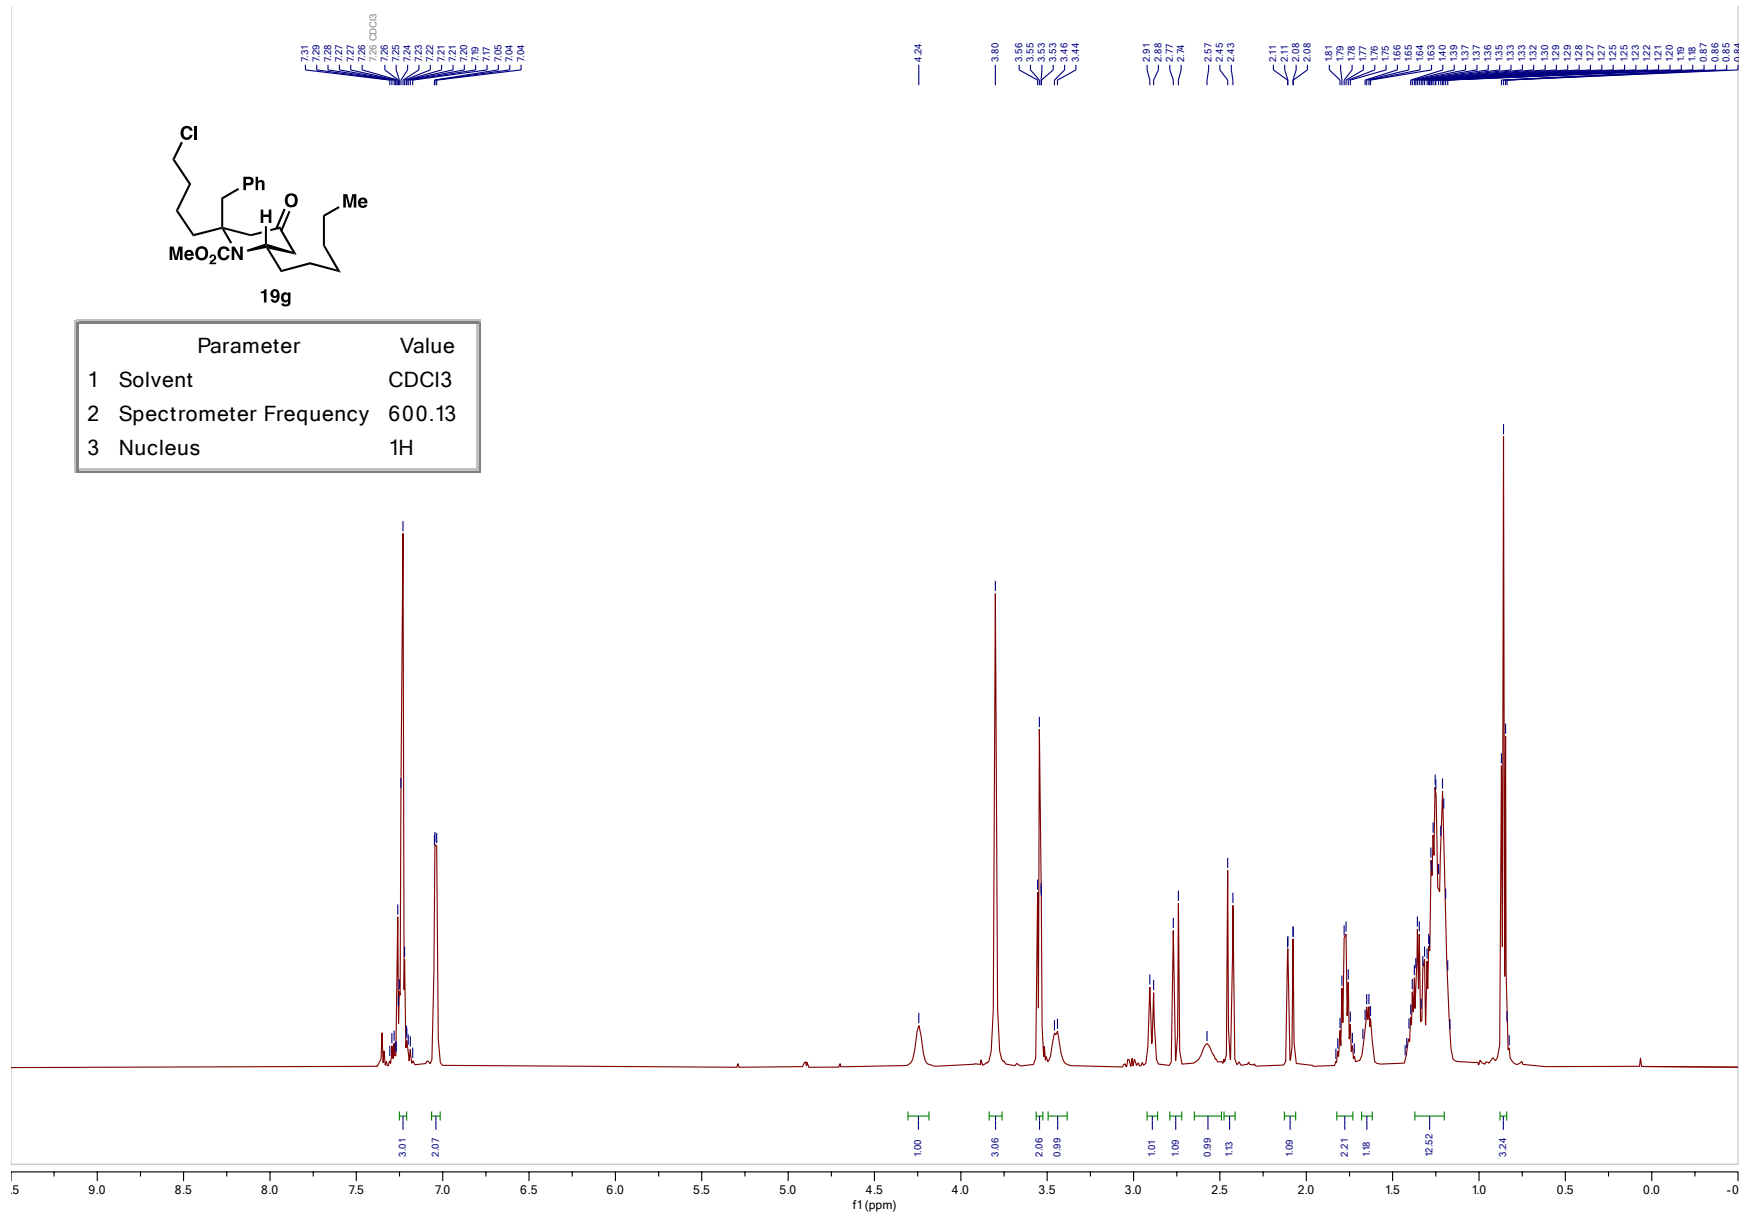

208.57

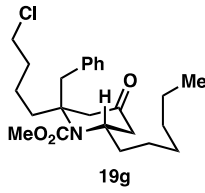

| Parameter                | Value           |
|--------------------------|-----------------|
| 1 Solvent                | CDCl3           |
| 2 Spectrometer Frequency | 150.92          |
| 3 Nucleus                | <sup>13</sup> C |

138.97  
131.08  
128.55  
127.17

77.16 CDCl3

61.97  
52.67  
52.42  
47.31  
44.89  
40.97  
37.51  
32.40  
31.49  
29.01  
27.03  
22.68  
21.33  
14.17

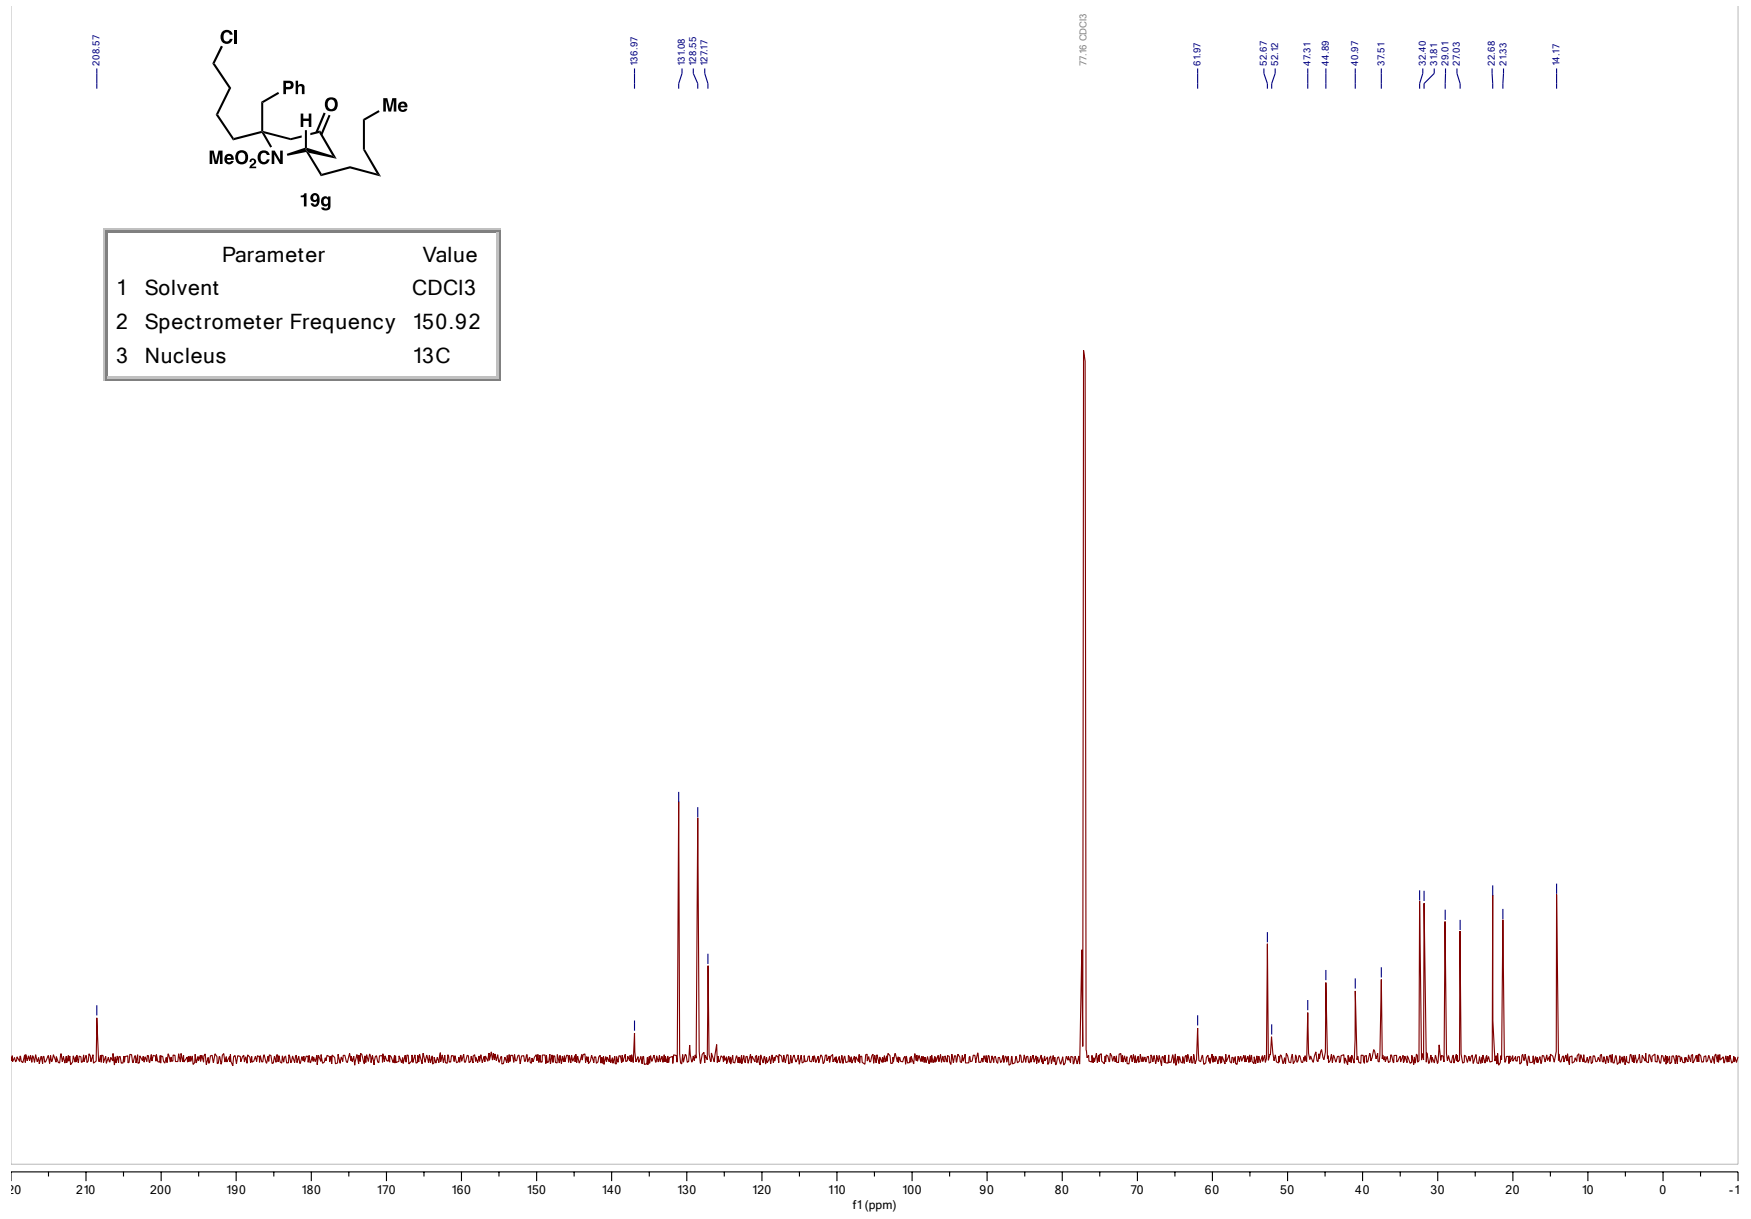

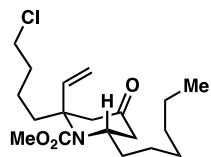

19h

| Parameter                | Value  |
|--------------------------|--------|
| 1 Solvent                | CDCl3  |
| 2 Spectrometer Frequency | 700.22 |
| 3 Nucleus                | 1H     |

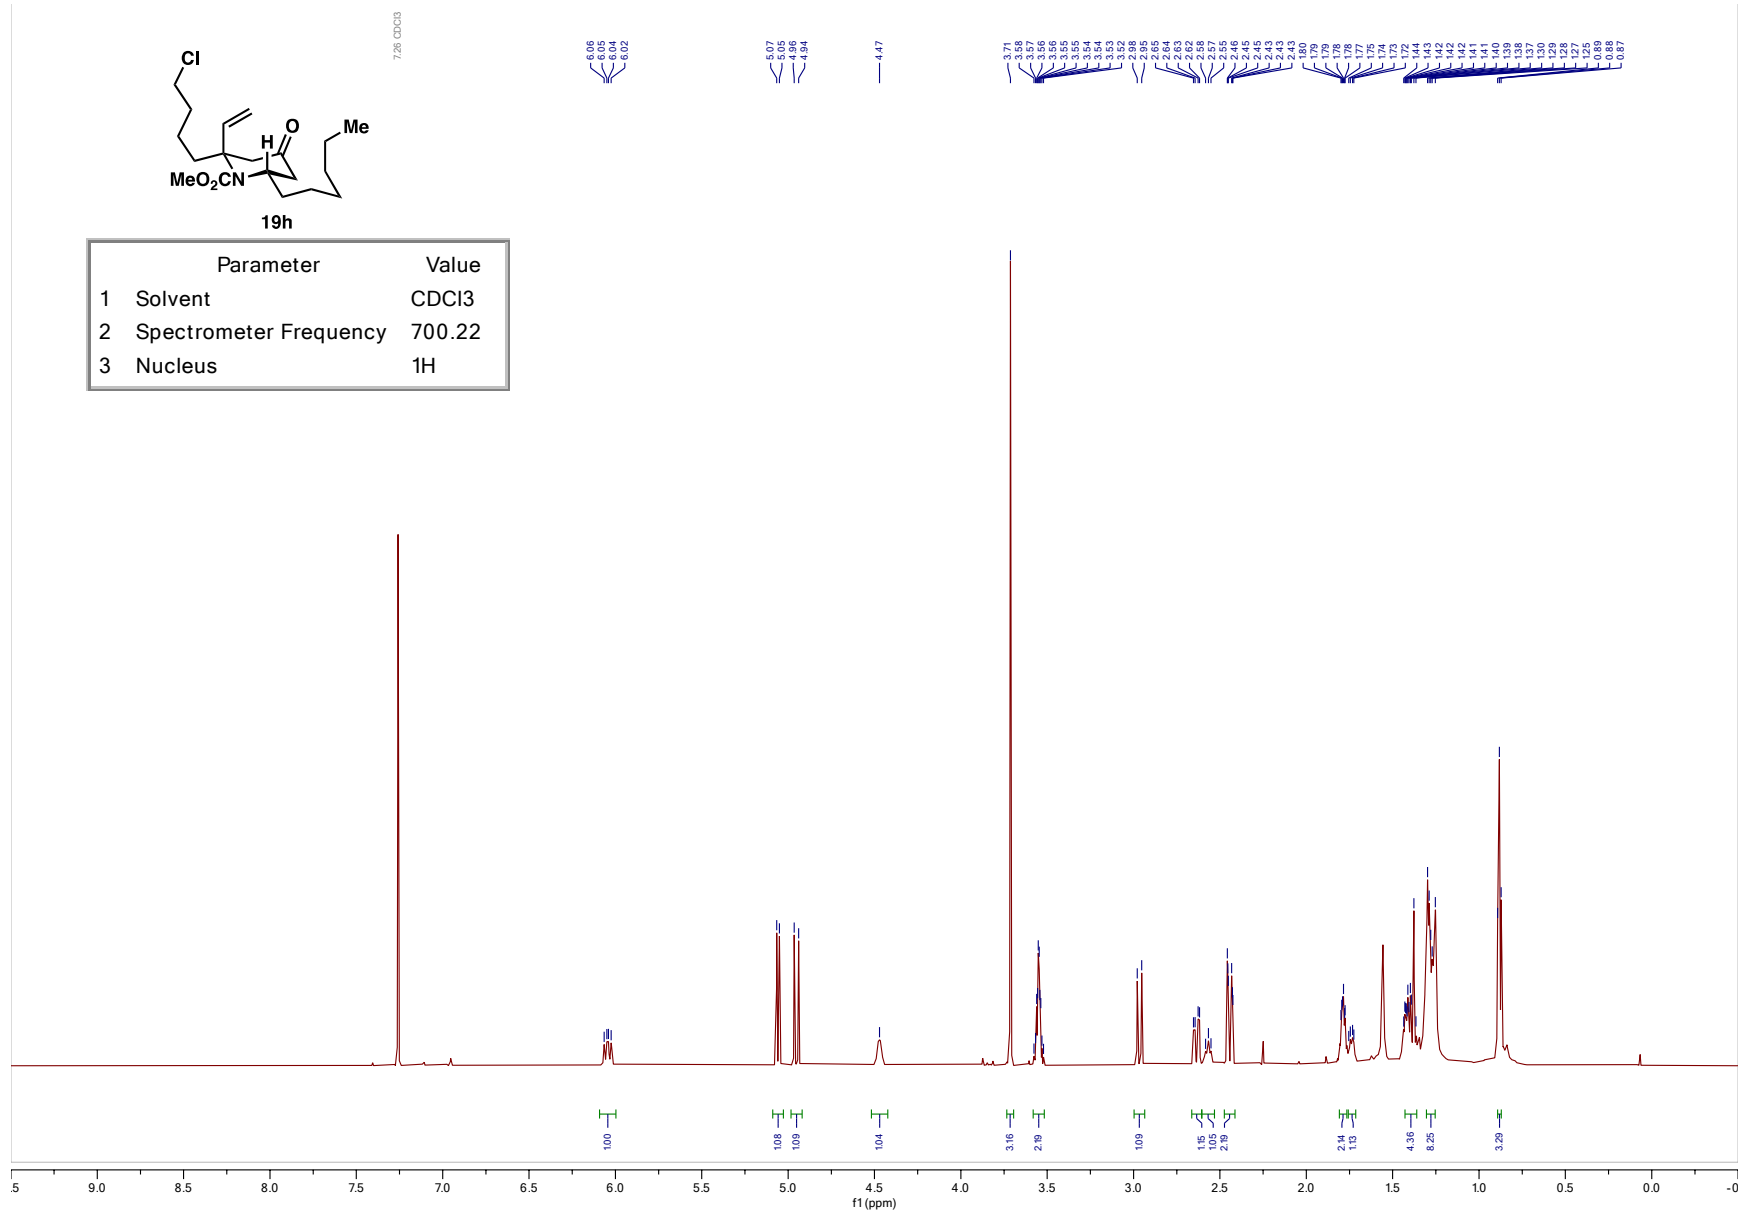

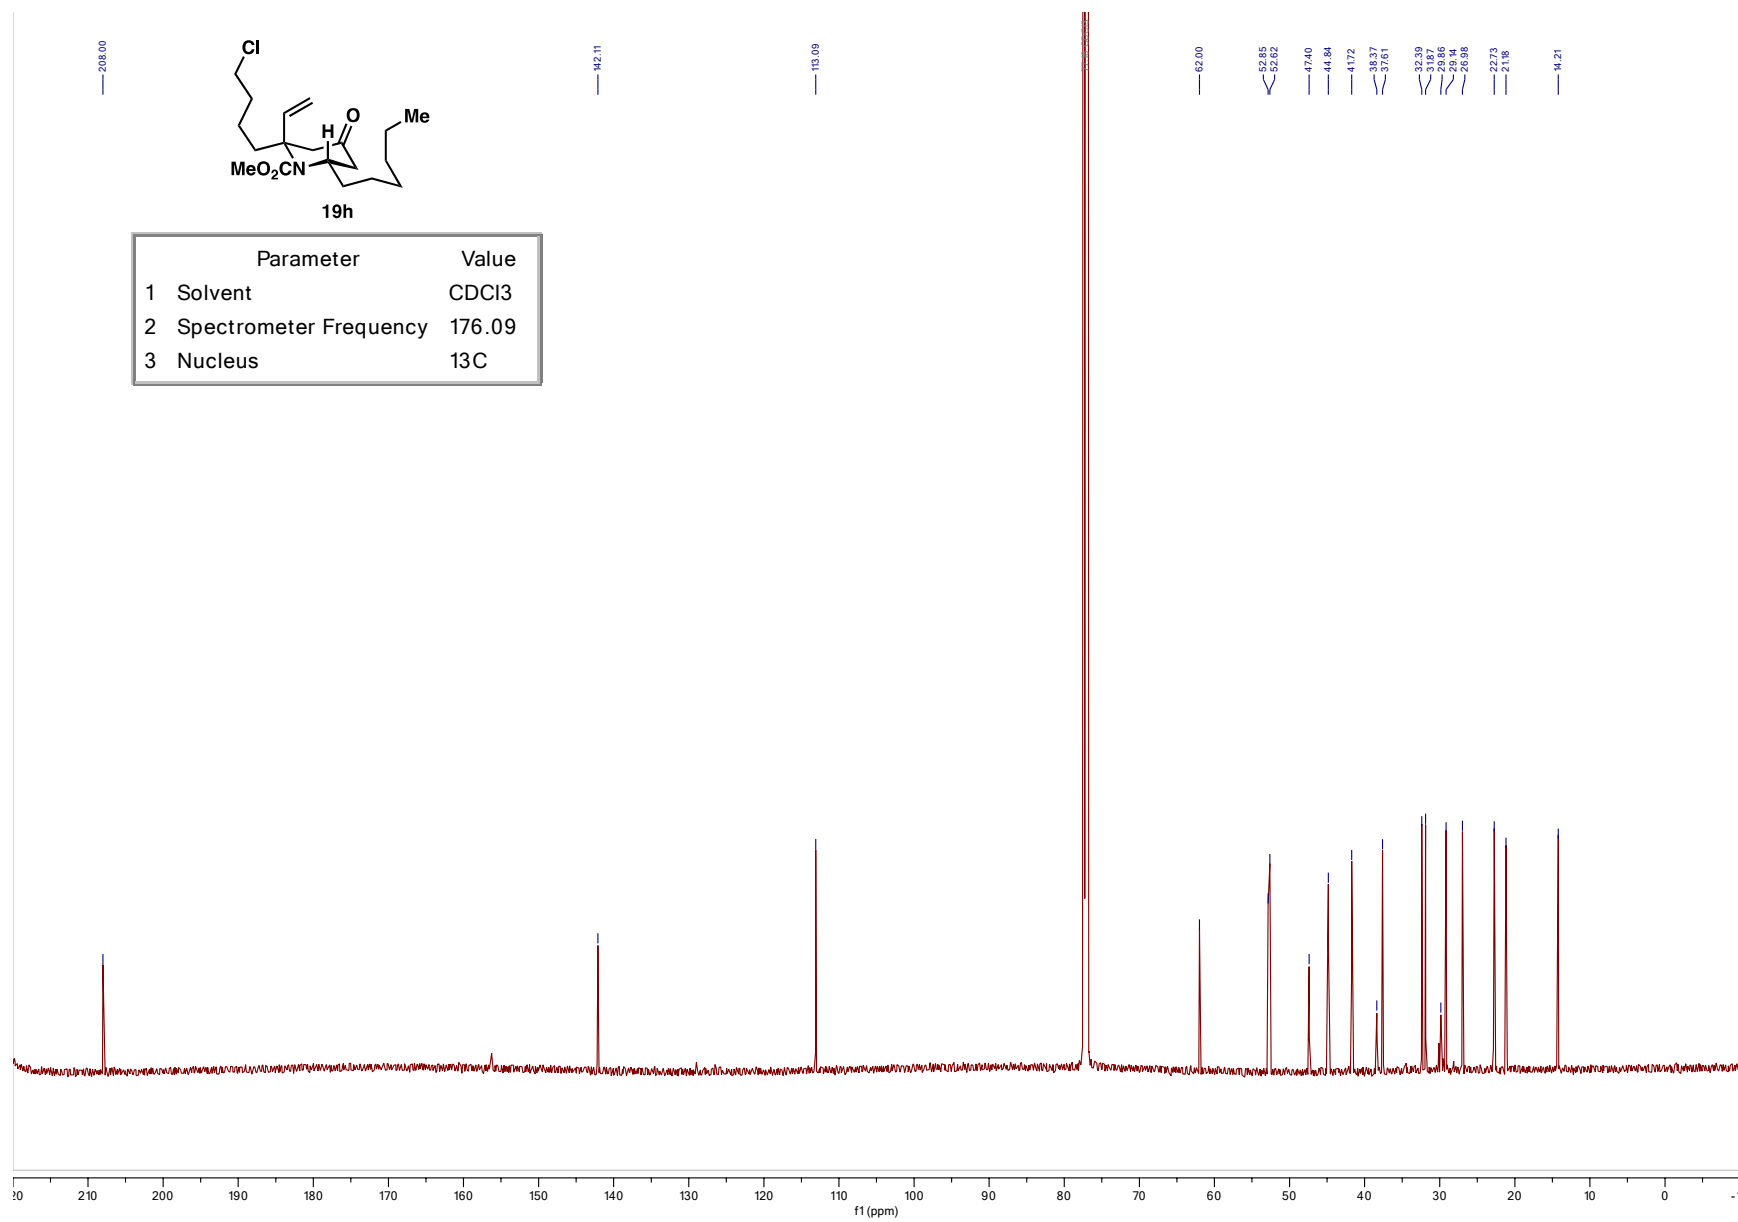

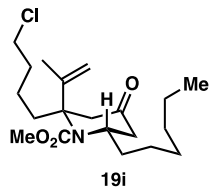

7.26 CDCl3

| Parameter                | Value          |
|--------------------------|----------------|
| 1 Solvent                | CDCl3          |
| 2 Spectrometer Frequency | 600.13         |
| 3 Nucleus                | <sup>1</sup> H |

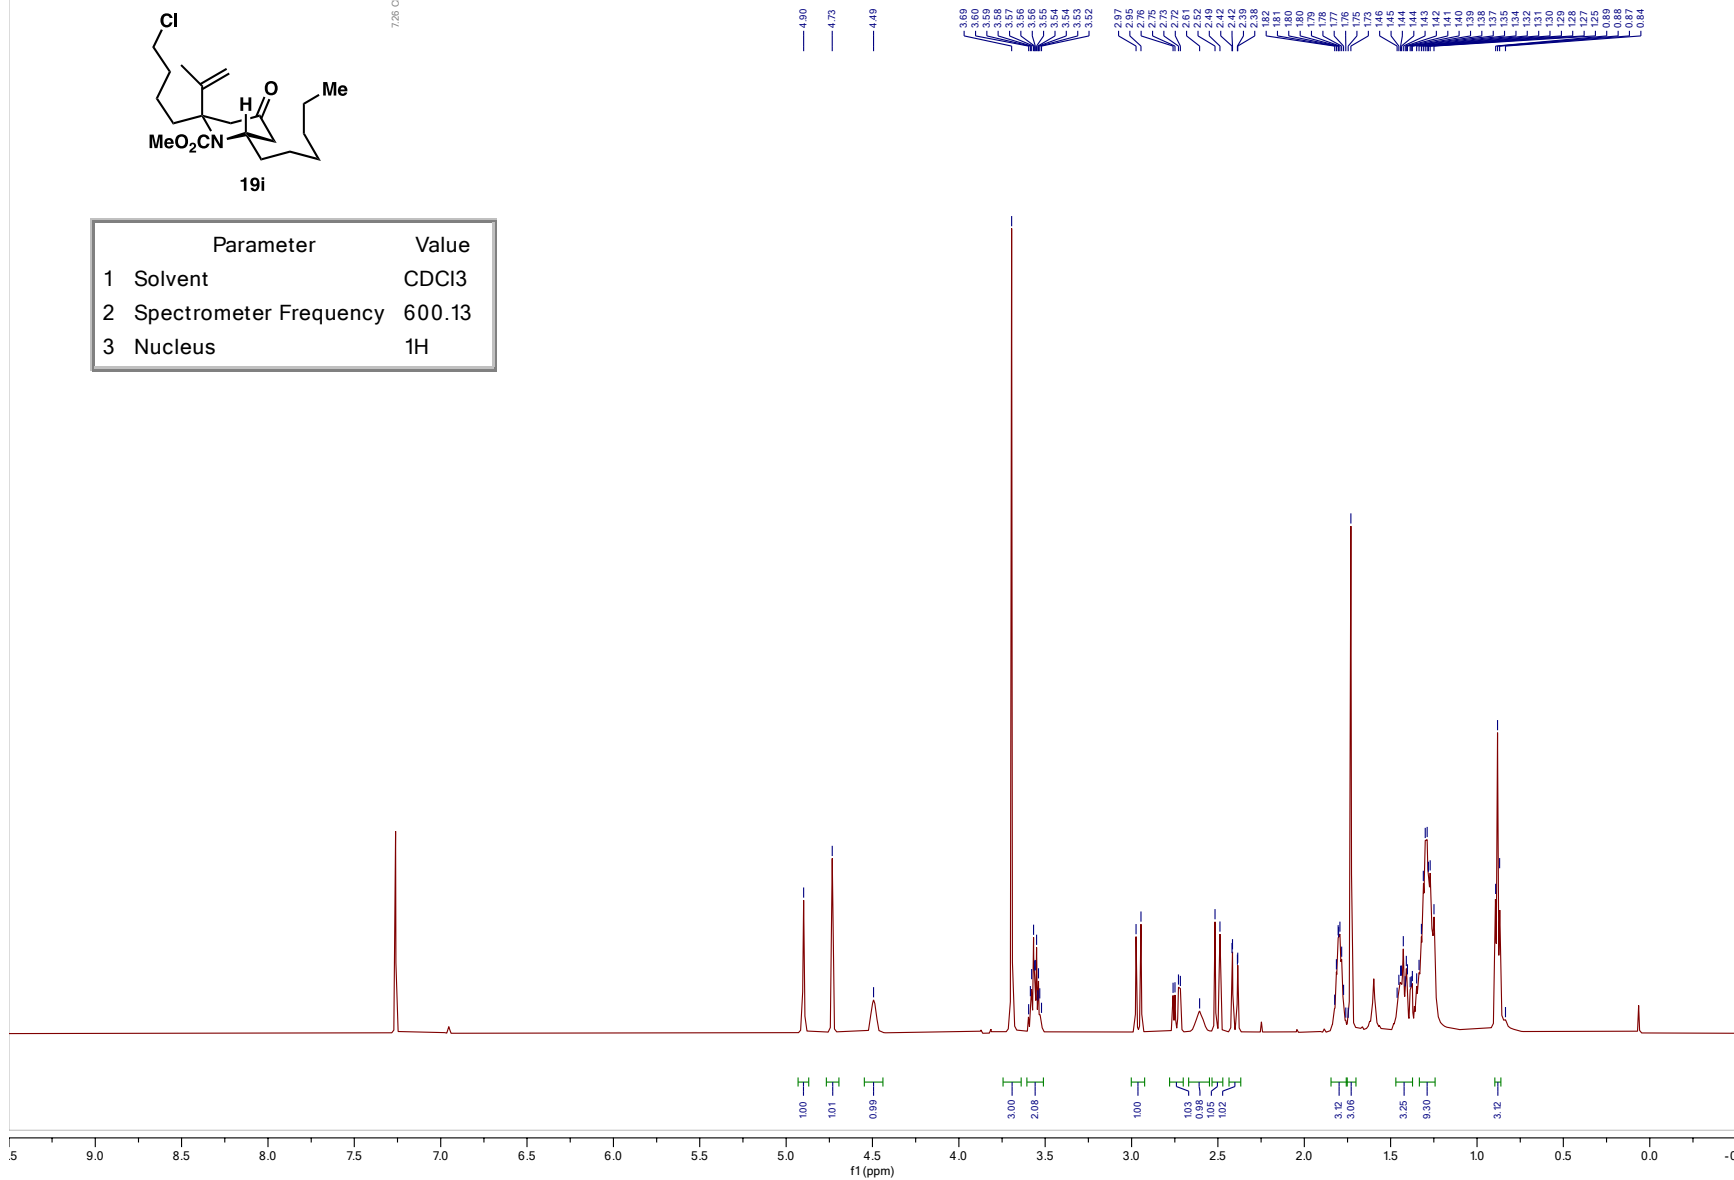



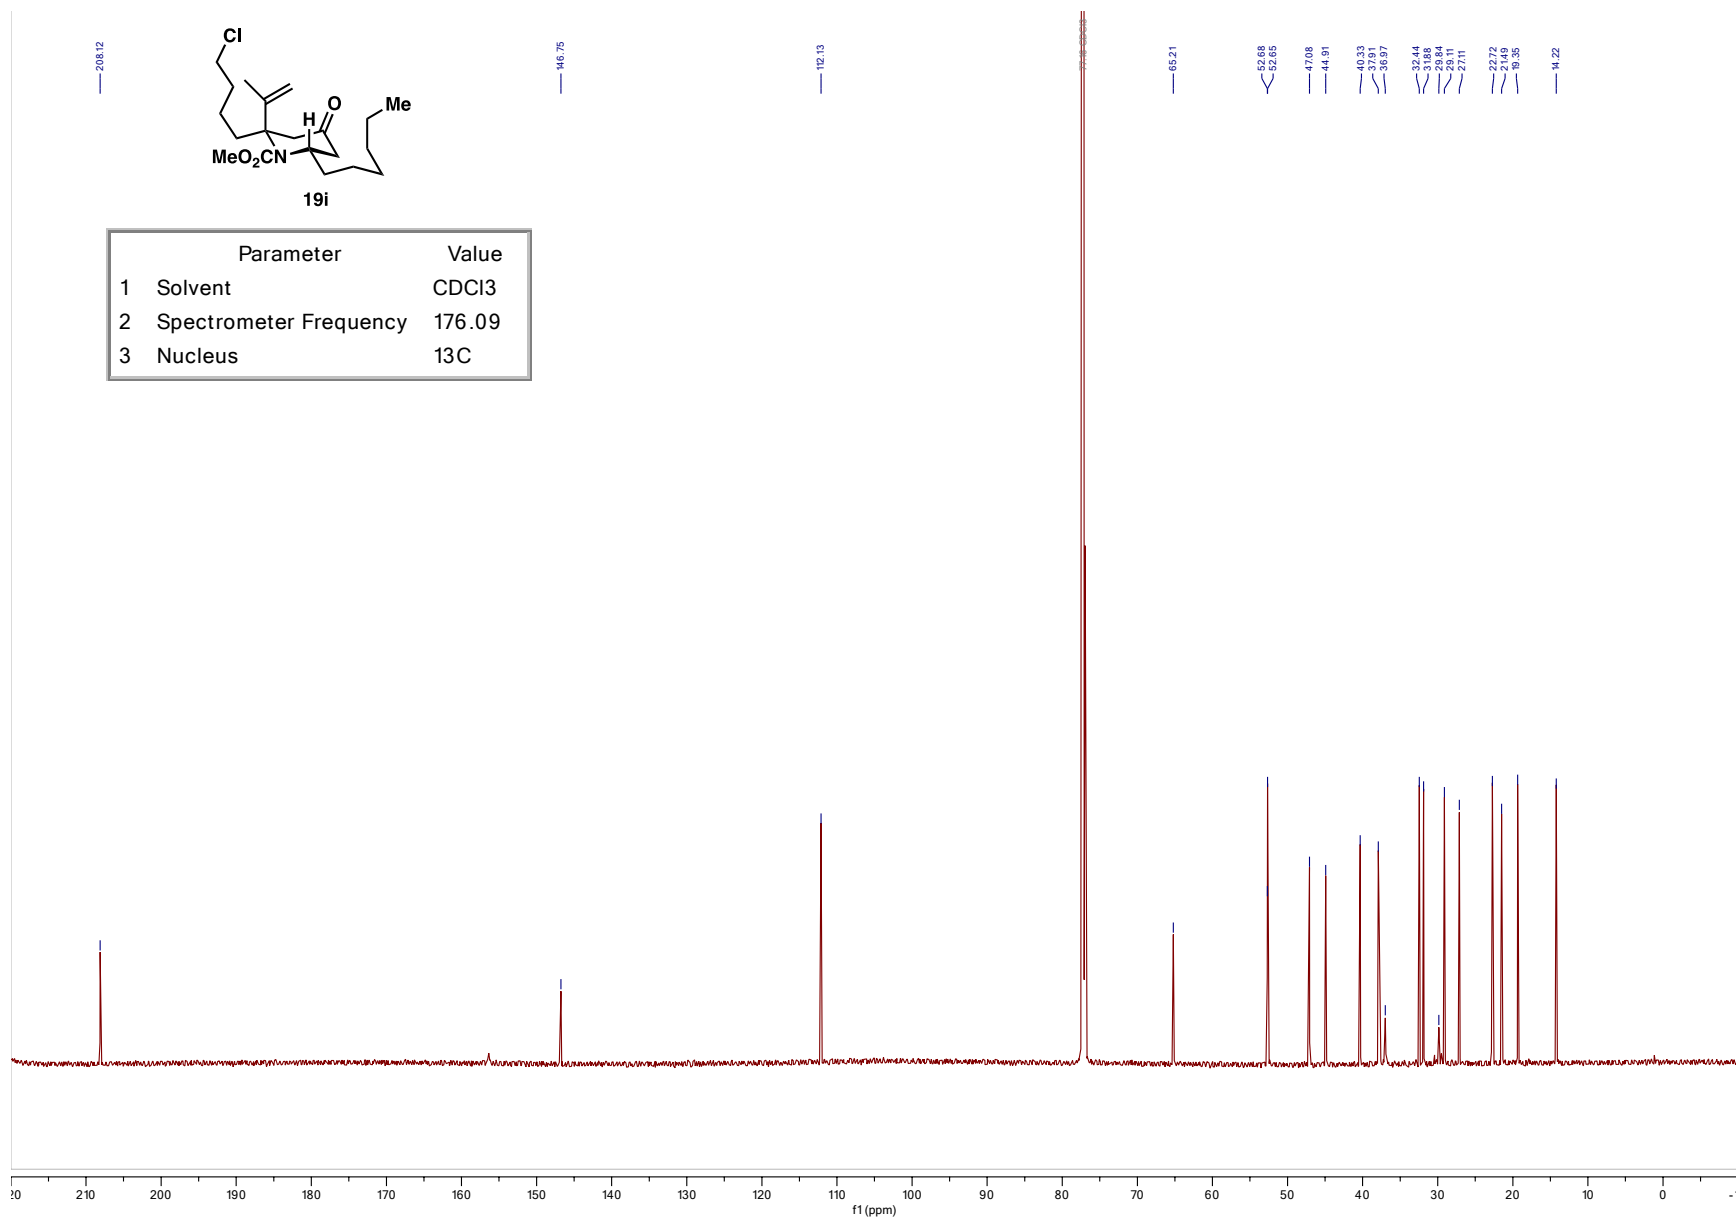

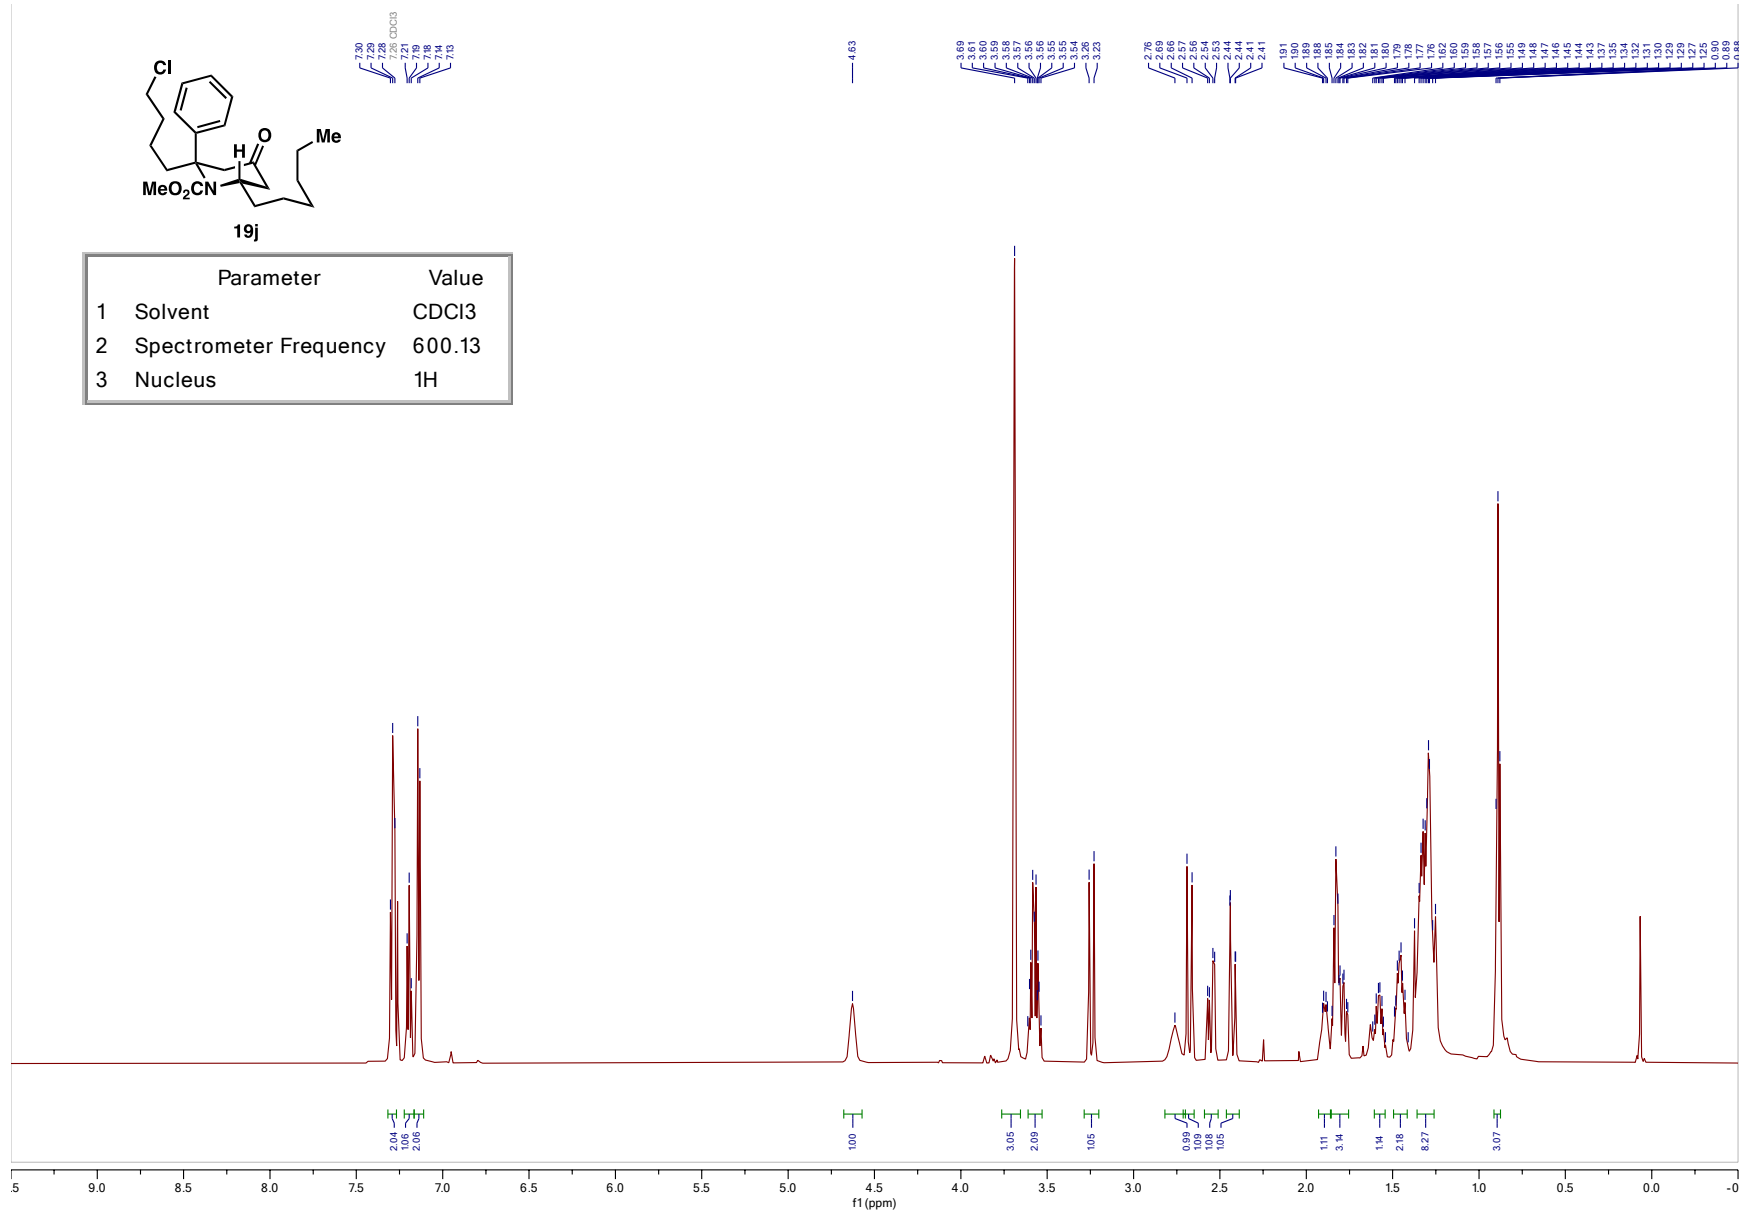

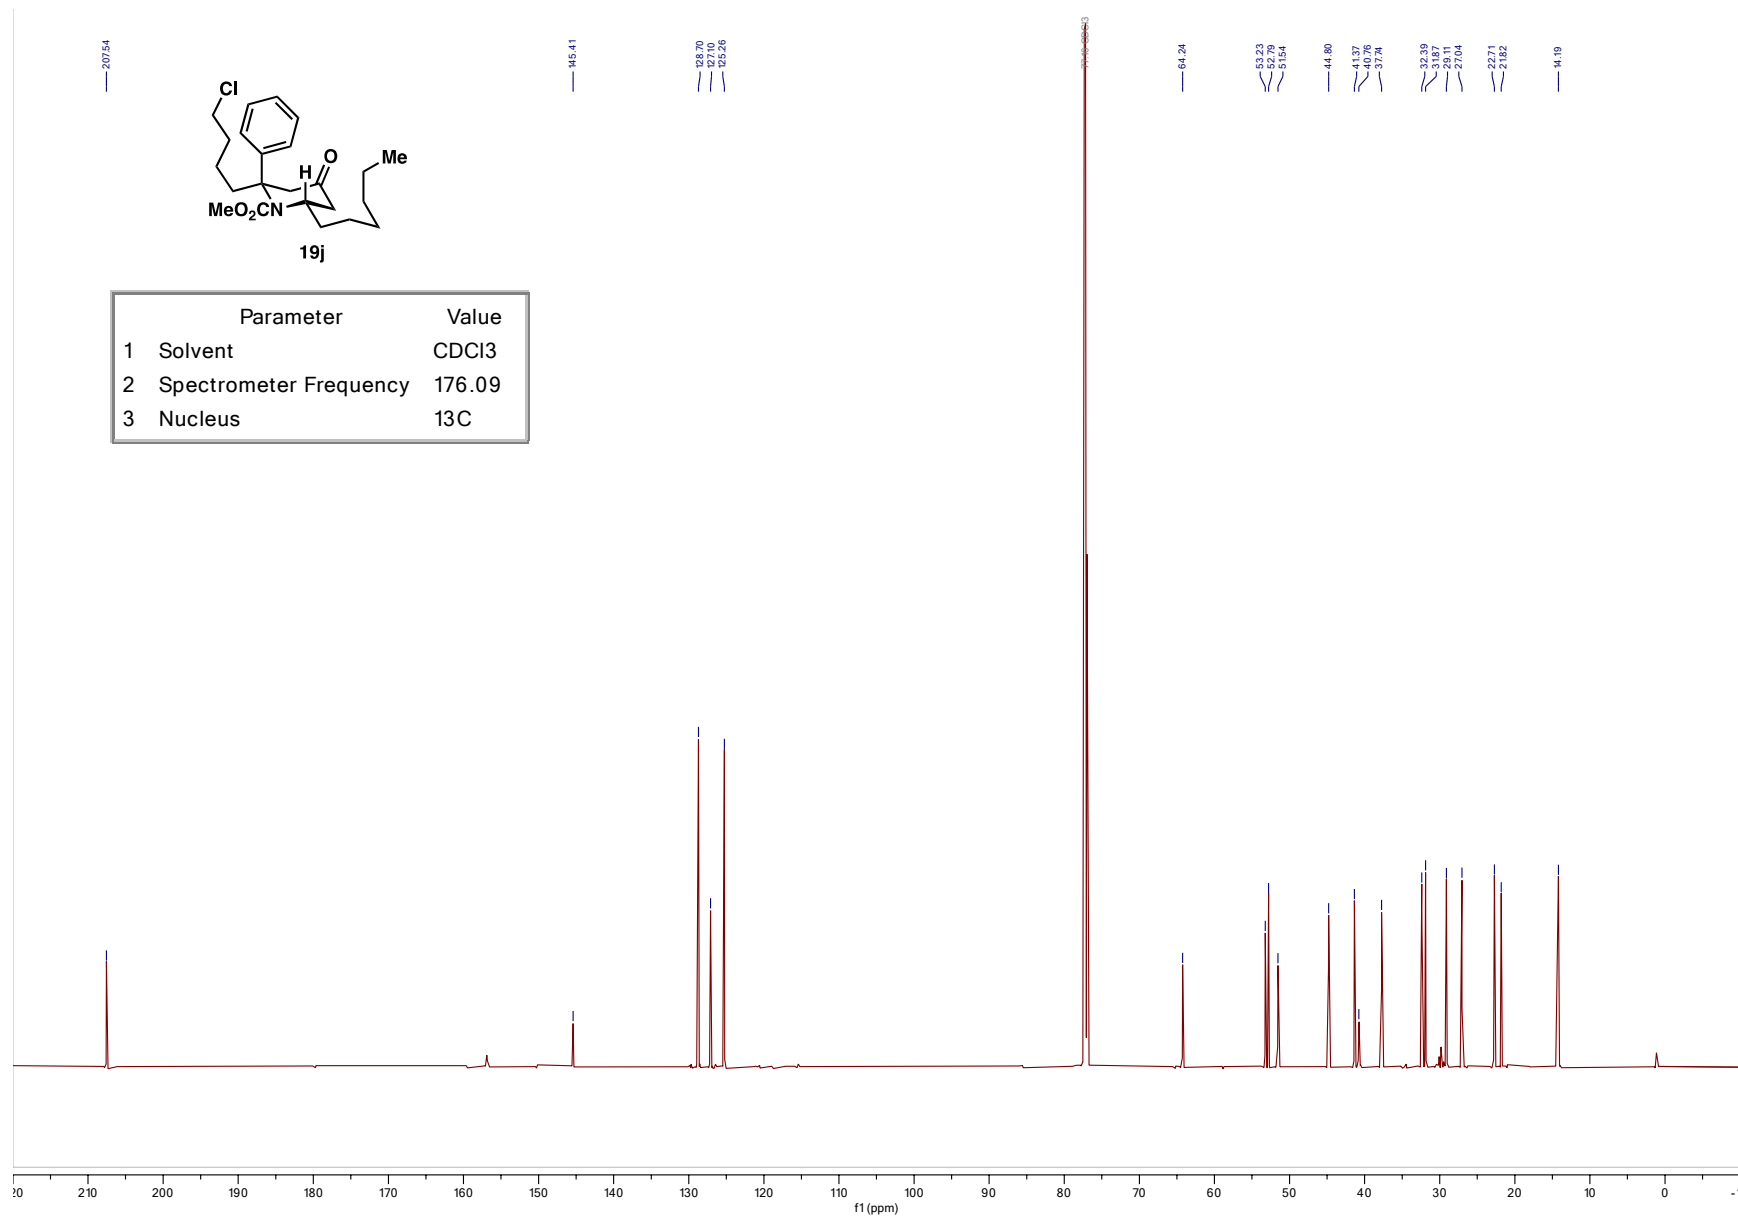

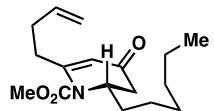

24

| Parameter                | Value  |
|--------------------------|--------|
| 1 Solvent                | CDCl3  |
| 2 Spectrometer Frequency | 600.13 |
| 3 Nucleus                | 1H     |

7.26 CDCl3

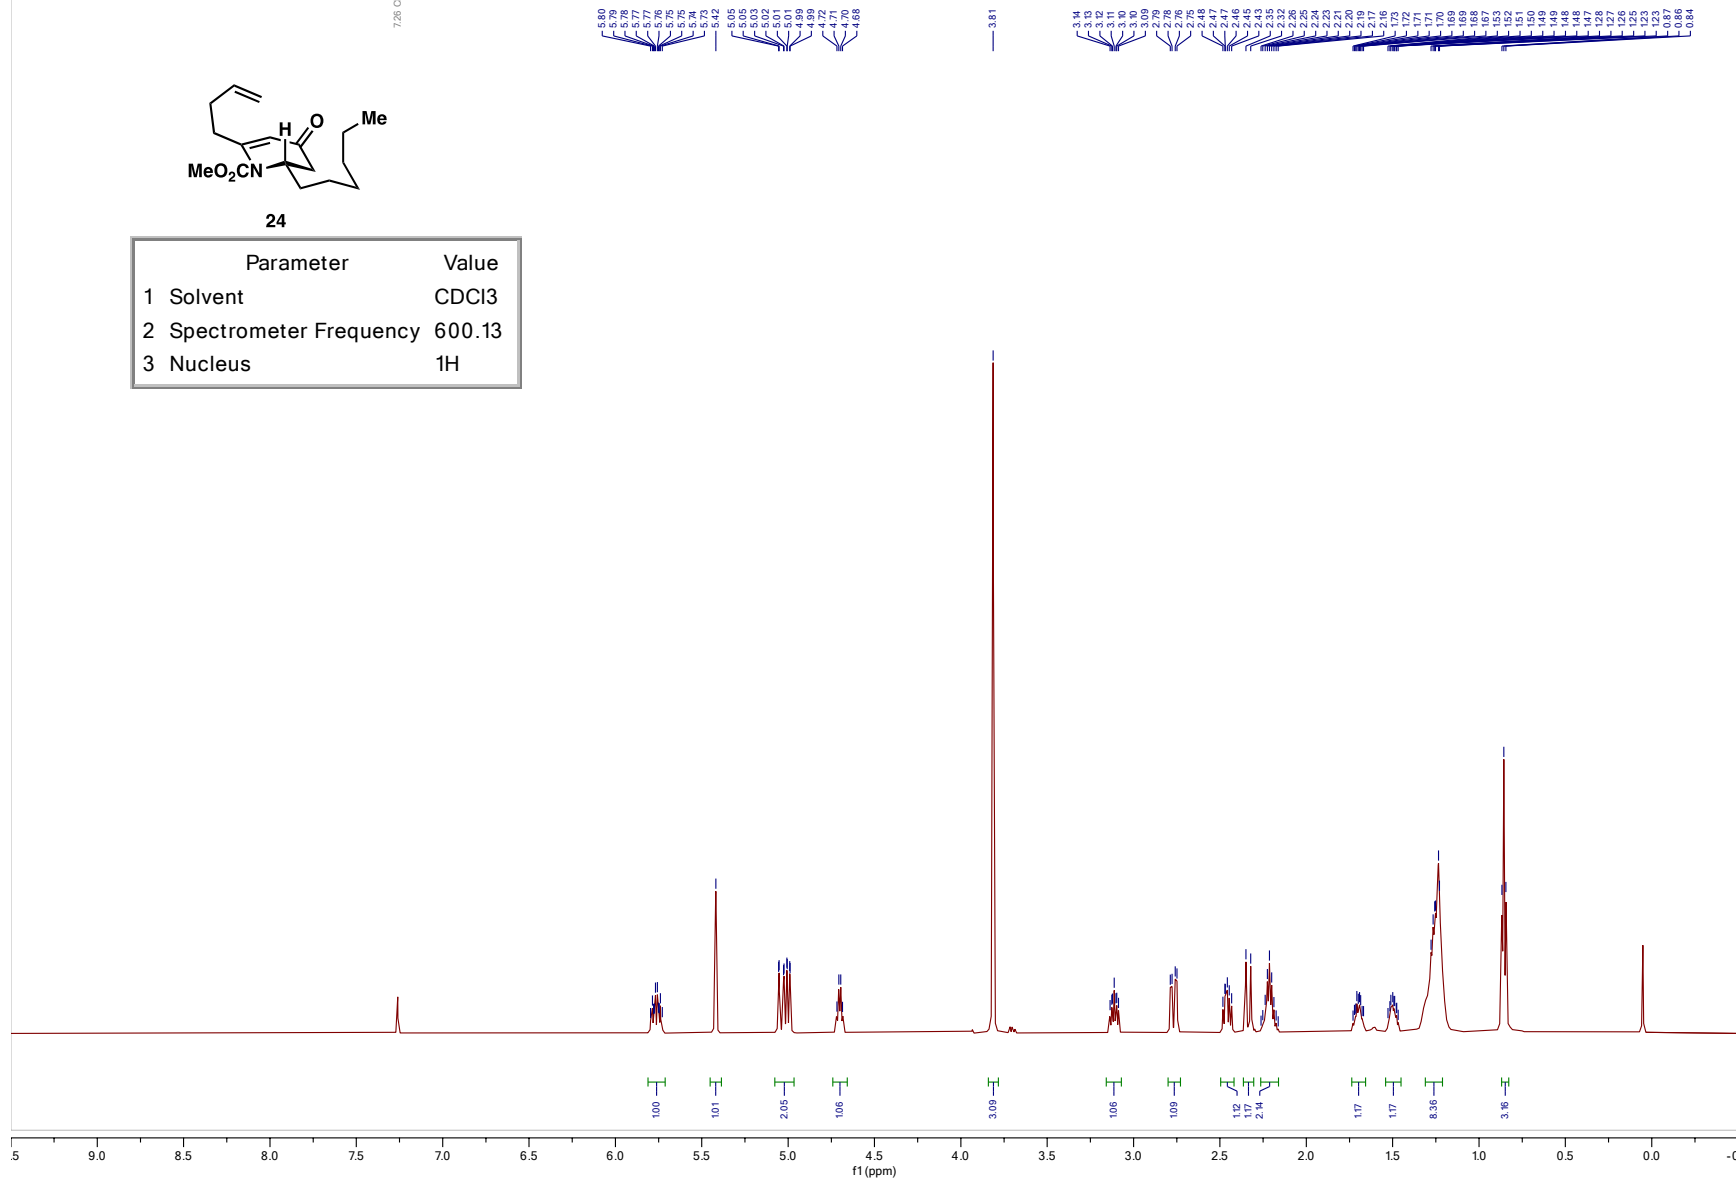

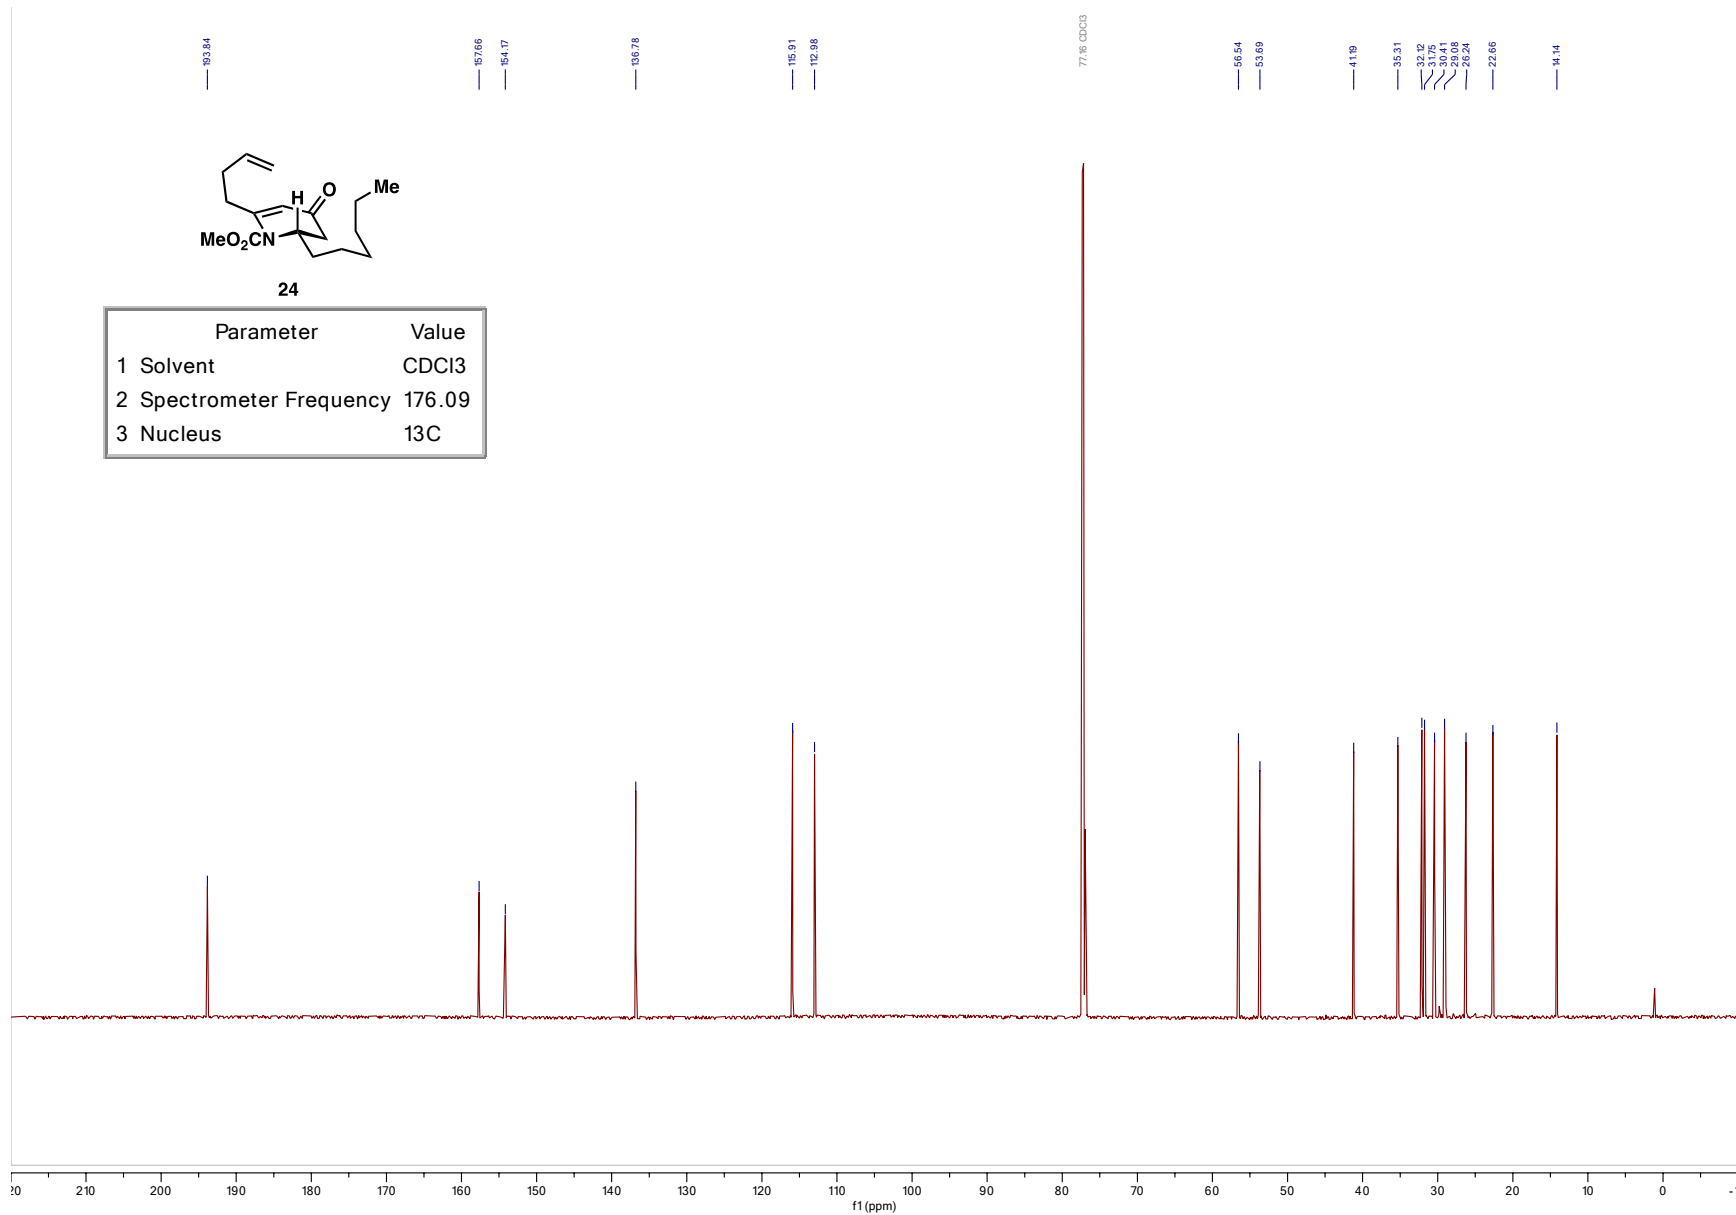

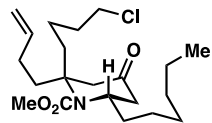

19k

| Parameter                | Value          |
|--------------------------|----------------|
| 1 Solvent                | CDCl3          |
| 2 Spectrometer Frequency | 600.13         |
| 3 Nucleus                | <sup>1</sup> H |

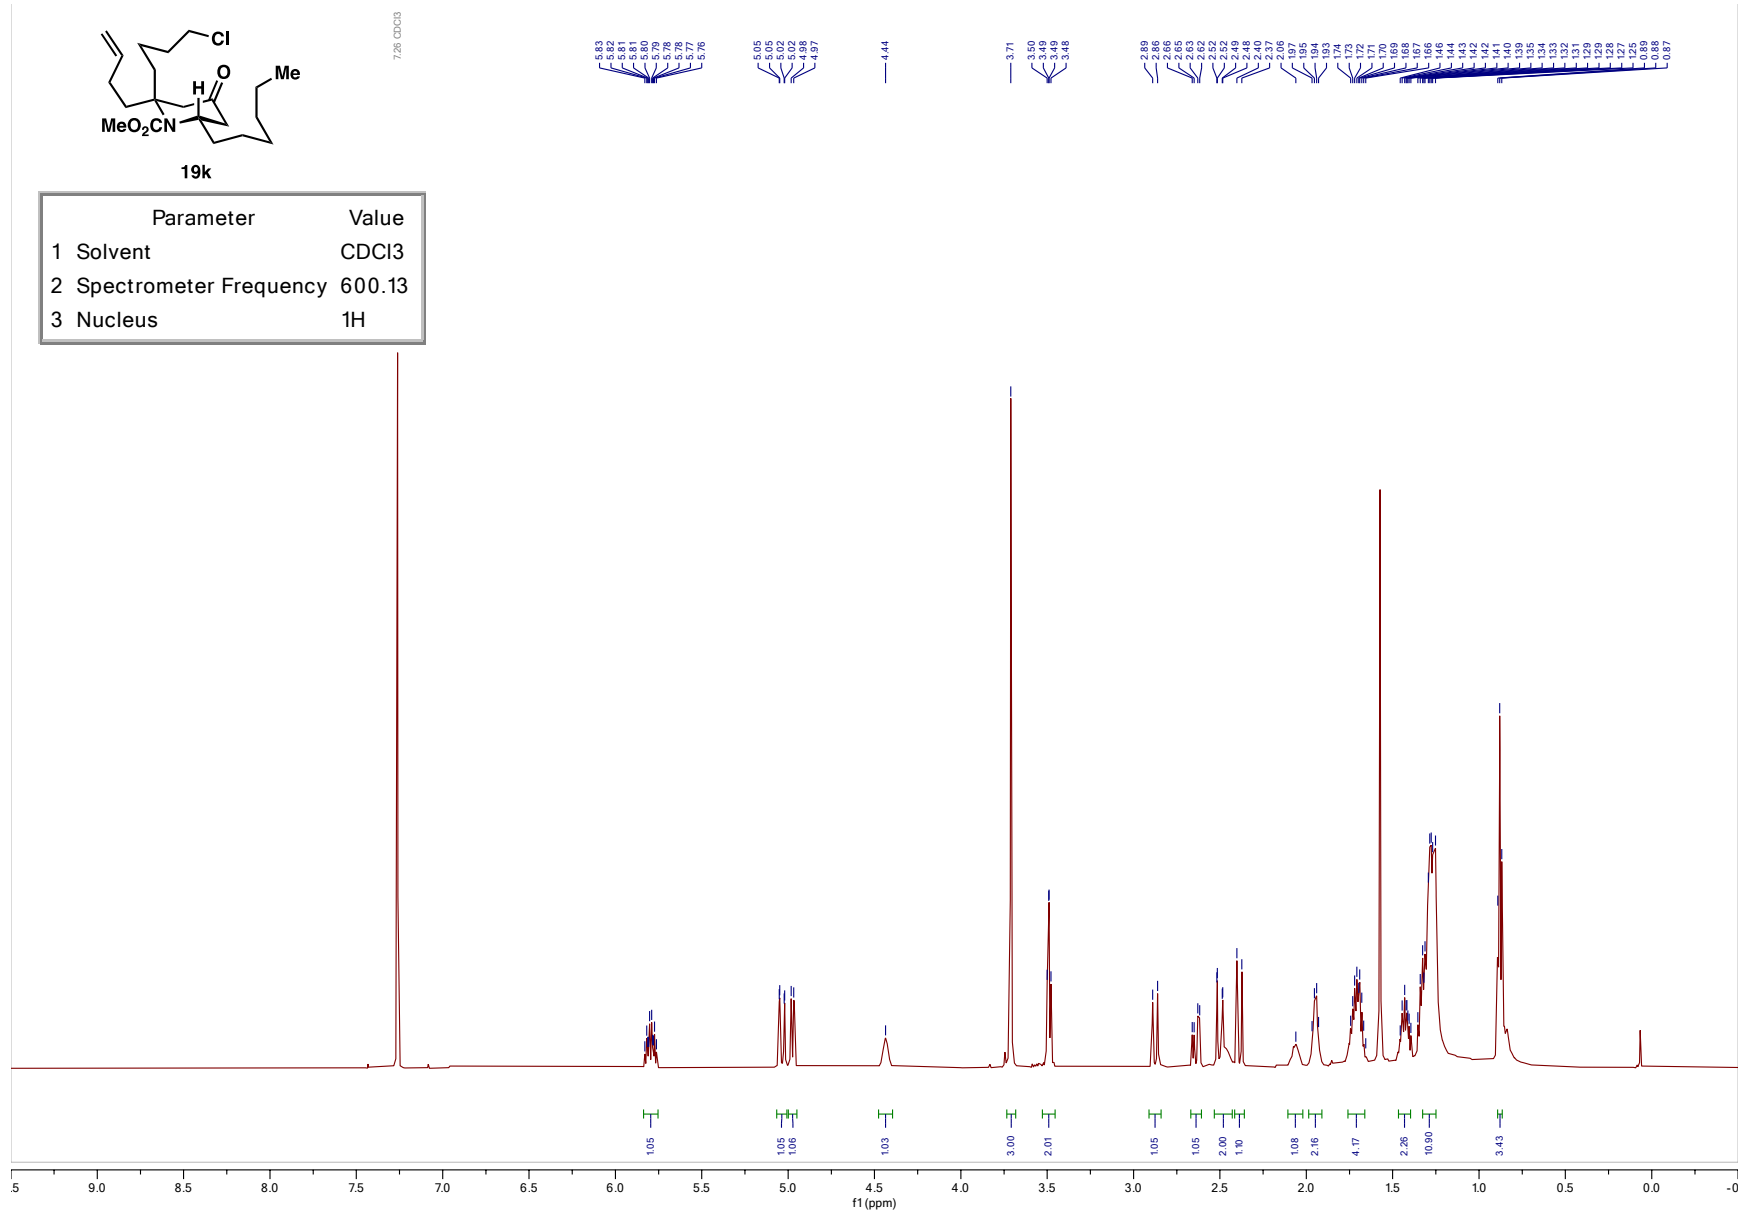

208.77

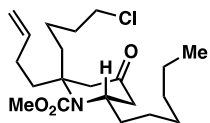

19k

|   | Parameter              | Value             |
|---|------------------------|-------------------|
| 1 | Solvent                | CDCl <sub>3</sub> |
| 2 | Spectrometer Frequency | 176.09            |
| 3 | Nucleus                | <sup>13</sup> C   |

138.07

115.16

61.21

52.54

52.30

46.98

44.74

41.46

39.54

37.62

32.88

29.86

29.11

27.83

27.19

22.71

22.02

14.19

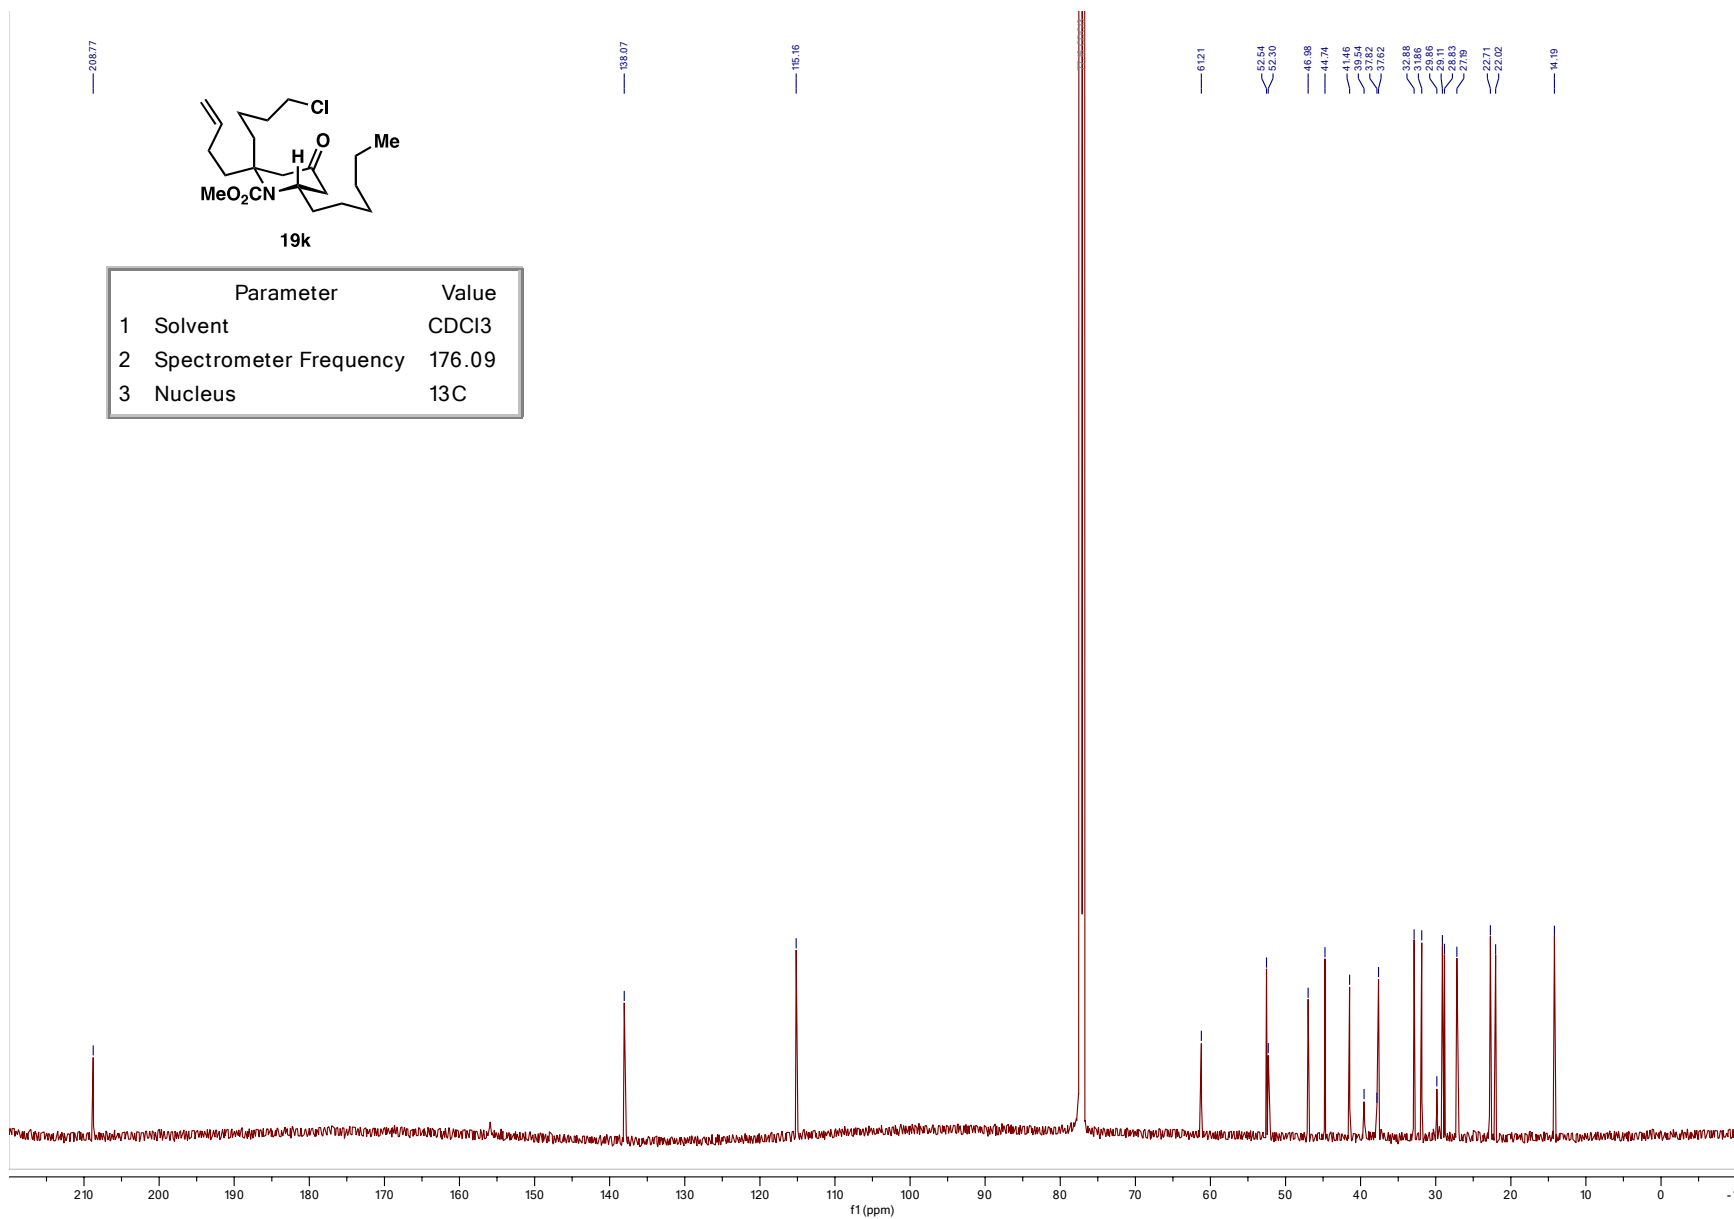

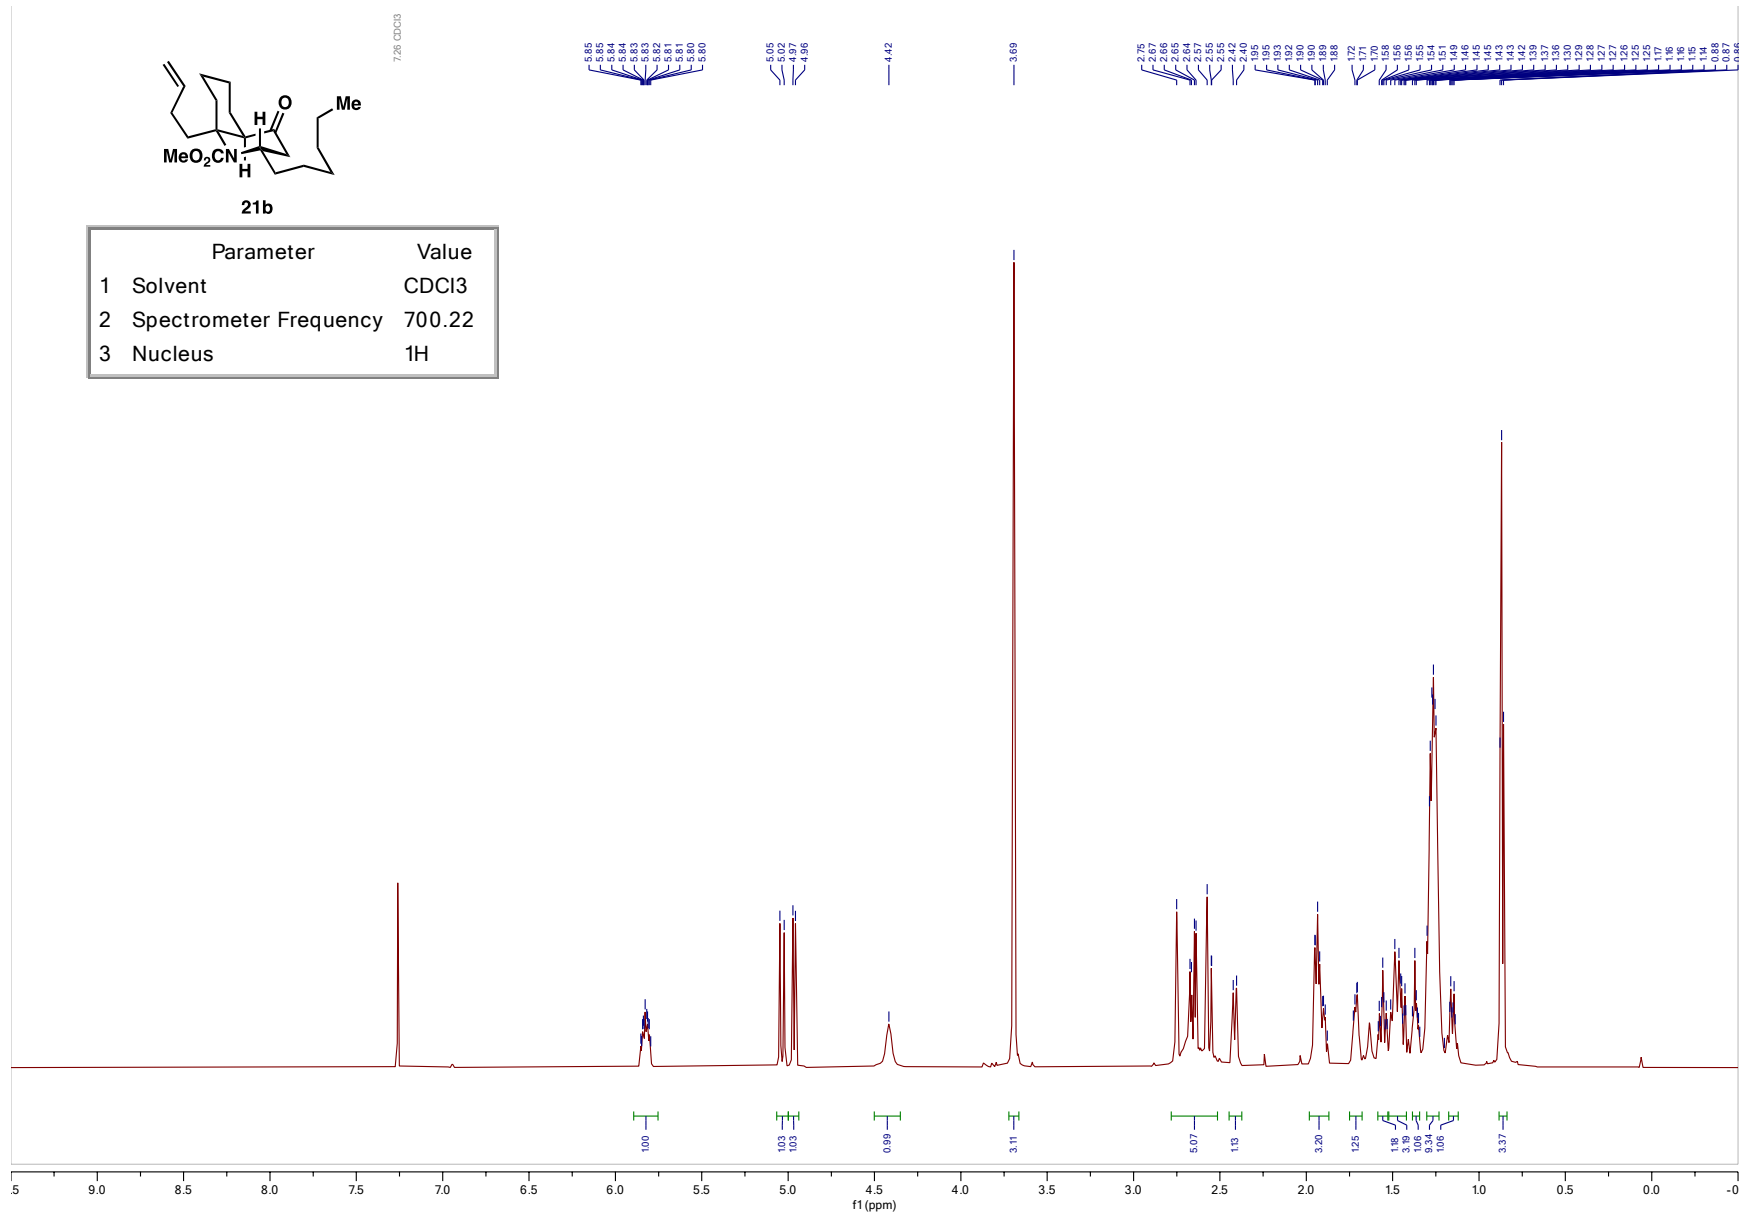



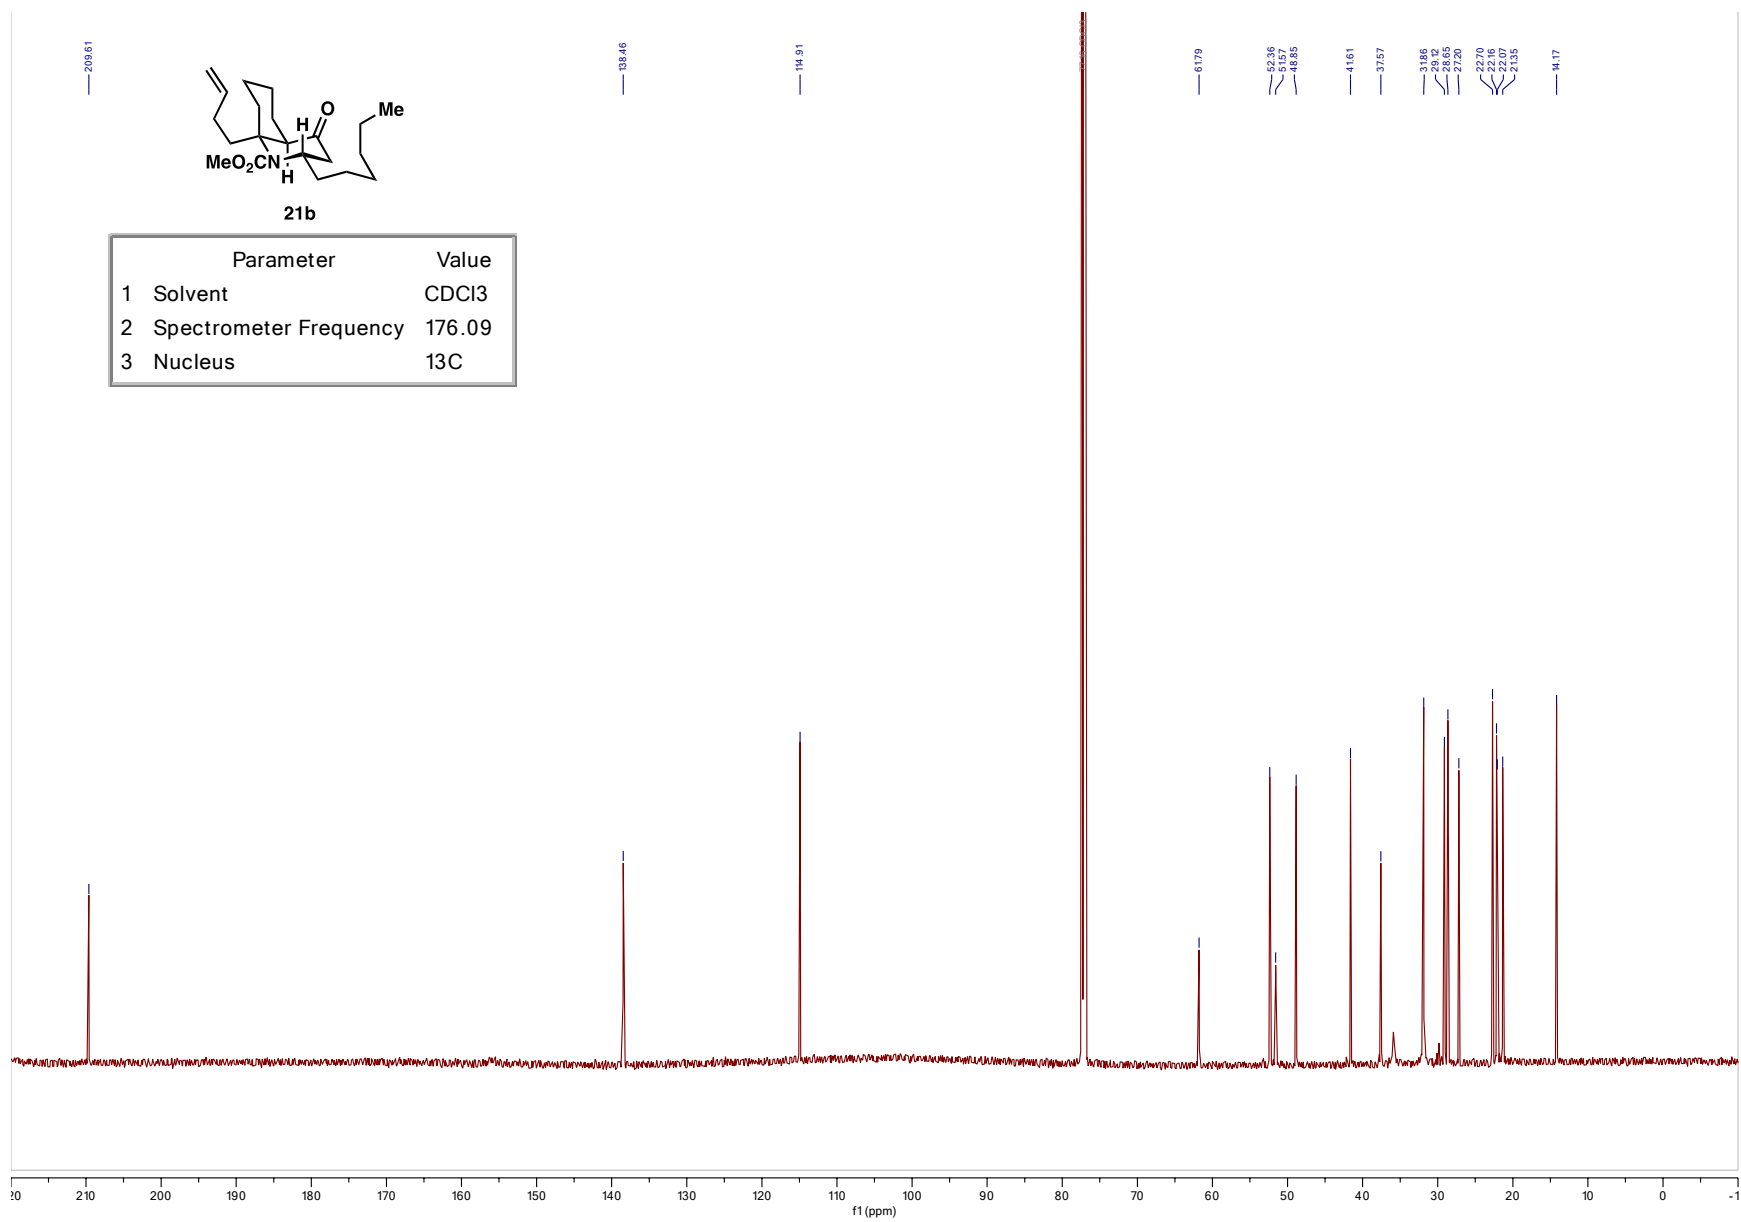

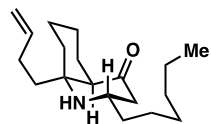

22b

| Parameter                | Value             |
|--------------------------|-------------------|
| 1 Solvent                | CDCl <sub>3</sub> |
| 2 Spectrometer Frequency | 400.17            |
| 3 Nucleus                | <sup>1</sup> H    |

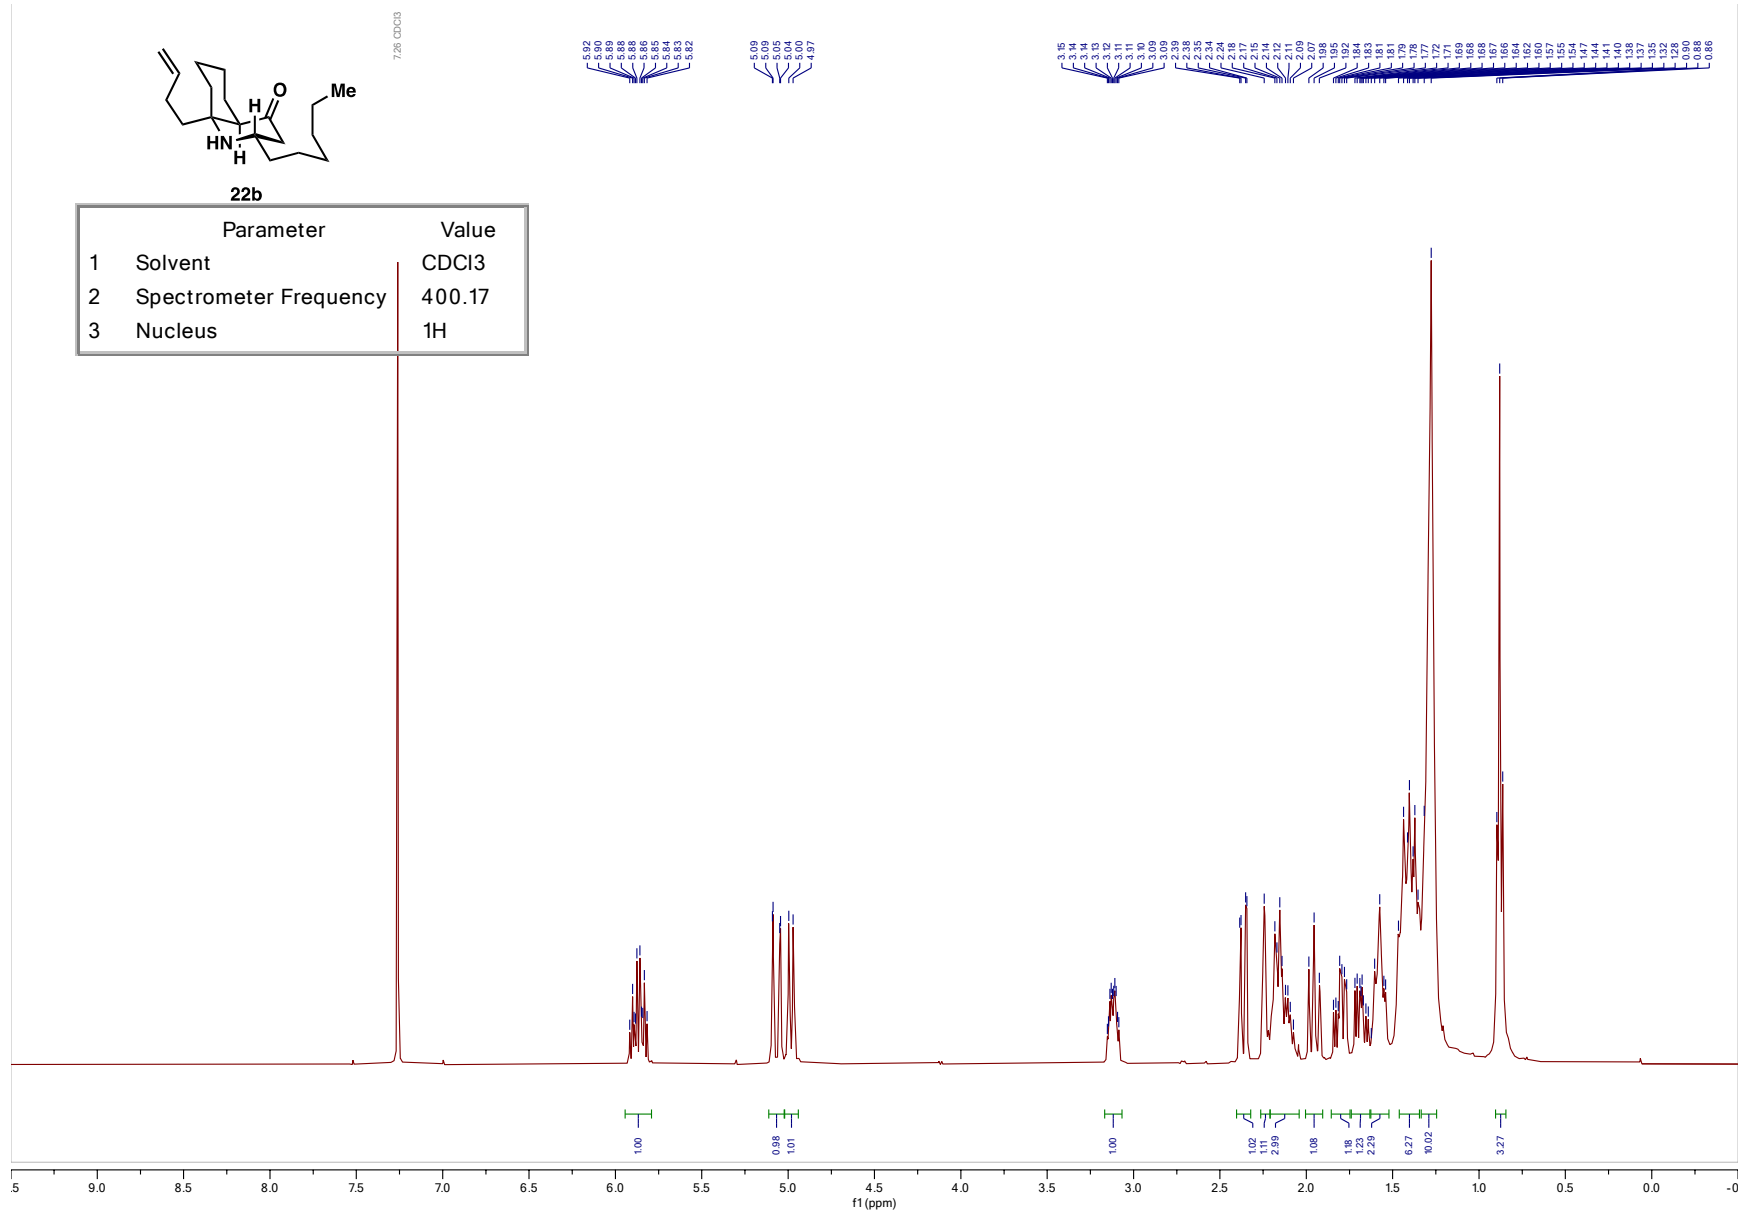

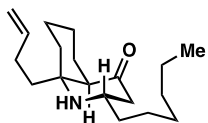

22b

| Parameter                | Value             |
|--------------------------|-------------------|
| 1 Solvent                | CDCl <sub>3</sub> |
| 2 Spectrometer Frequency | 176.09            |
| 3 Nucleus                | <sup>13</sup> C   |

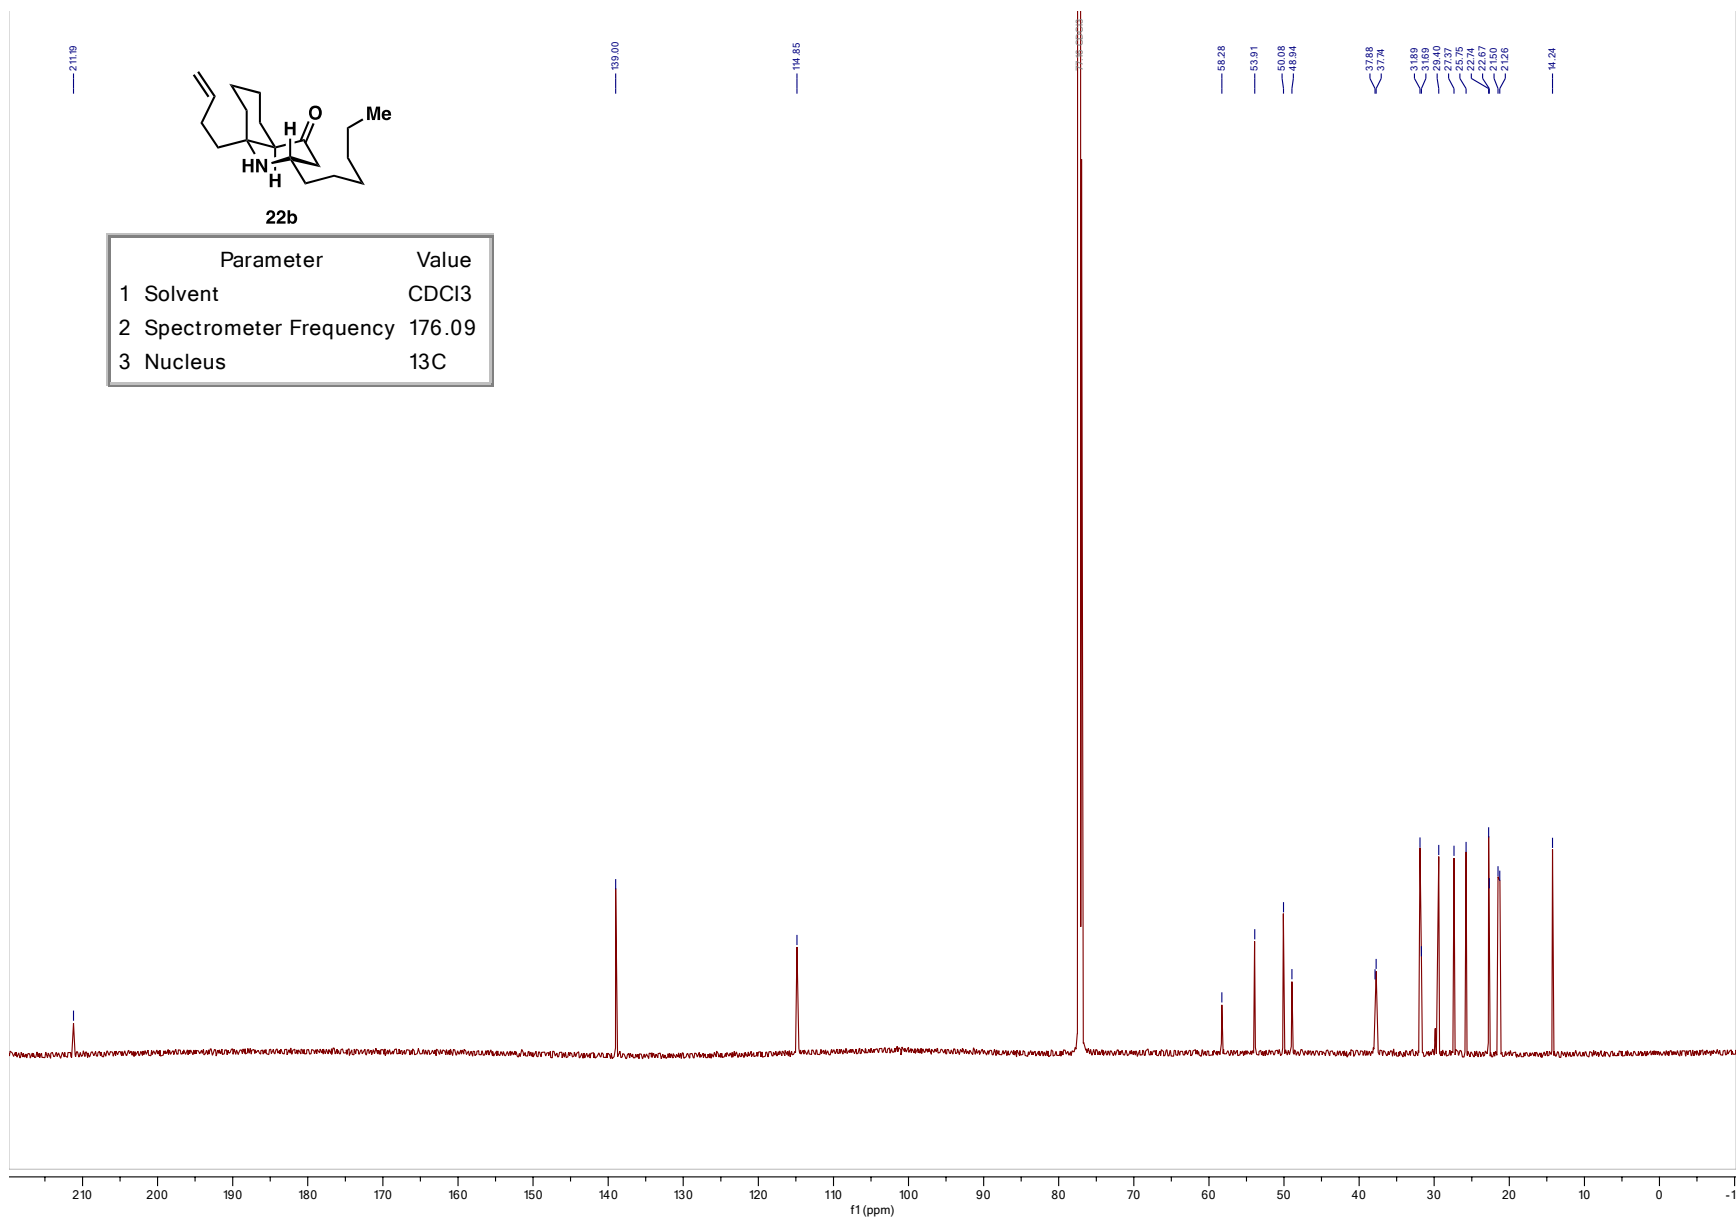

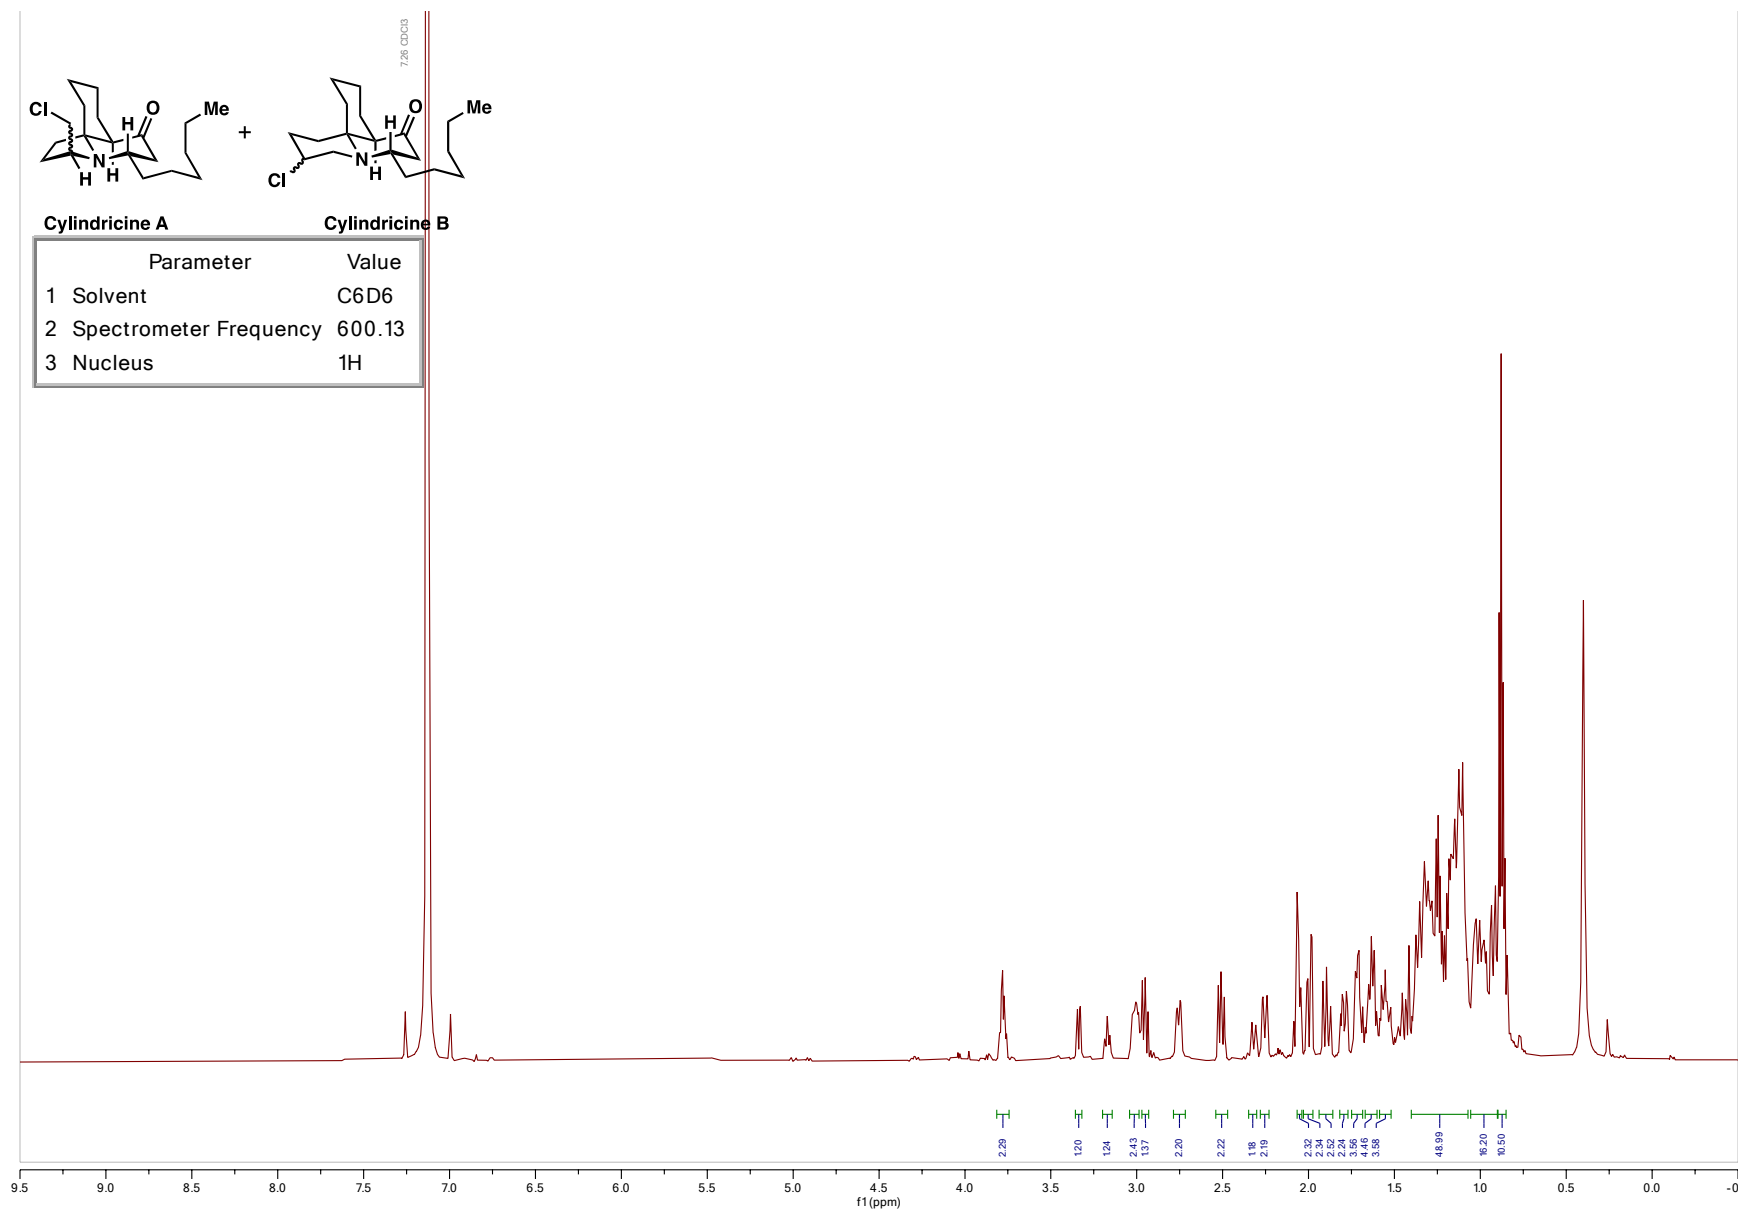

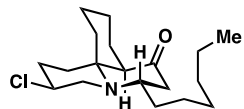

**Cylindricine B**

| Parameter                | Value          |
|--------------------------|----------------|
| 1 Solvent                | C6D6           |
| 2 Spectrometer Frequency | 600.13         |
| 3 Nucleus                | <sup>1</sup> H |

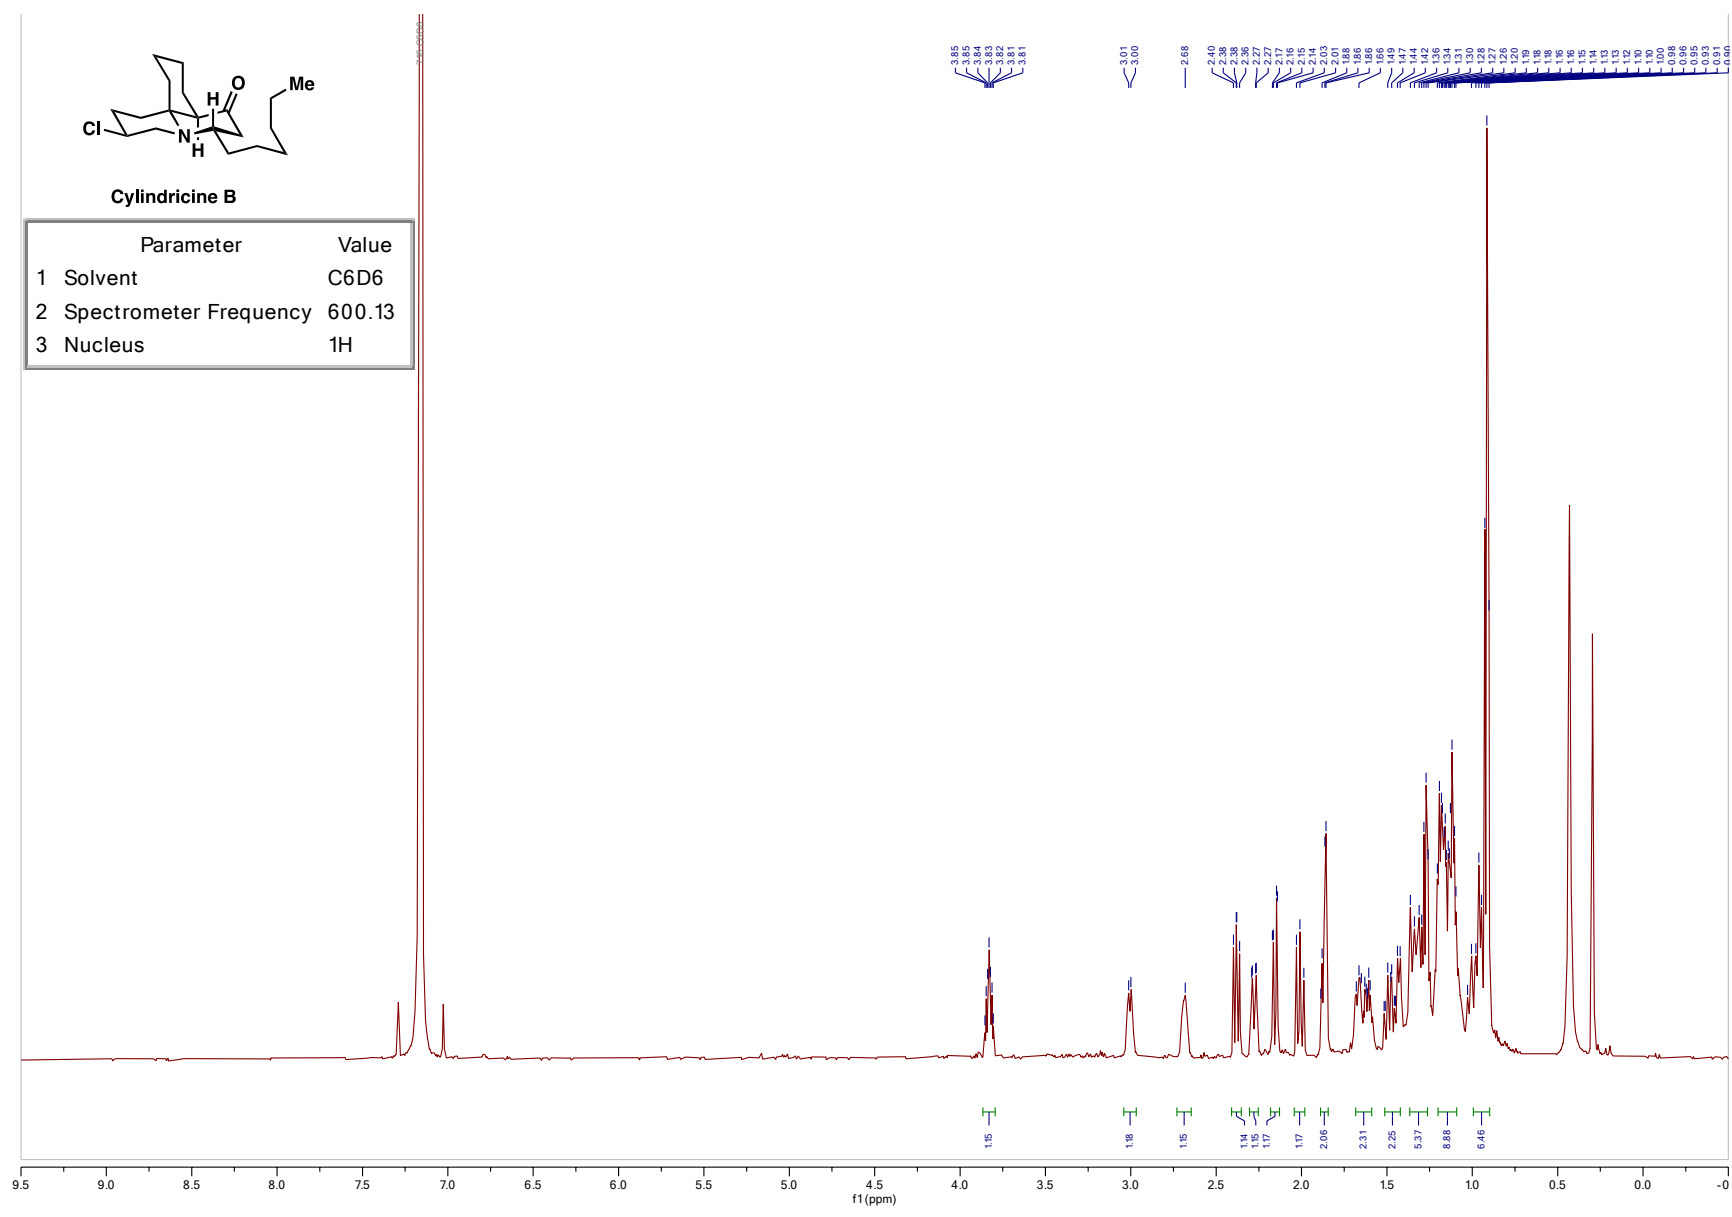

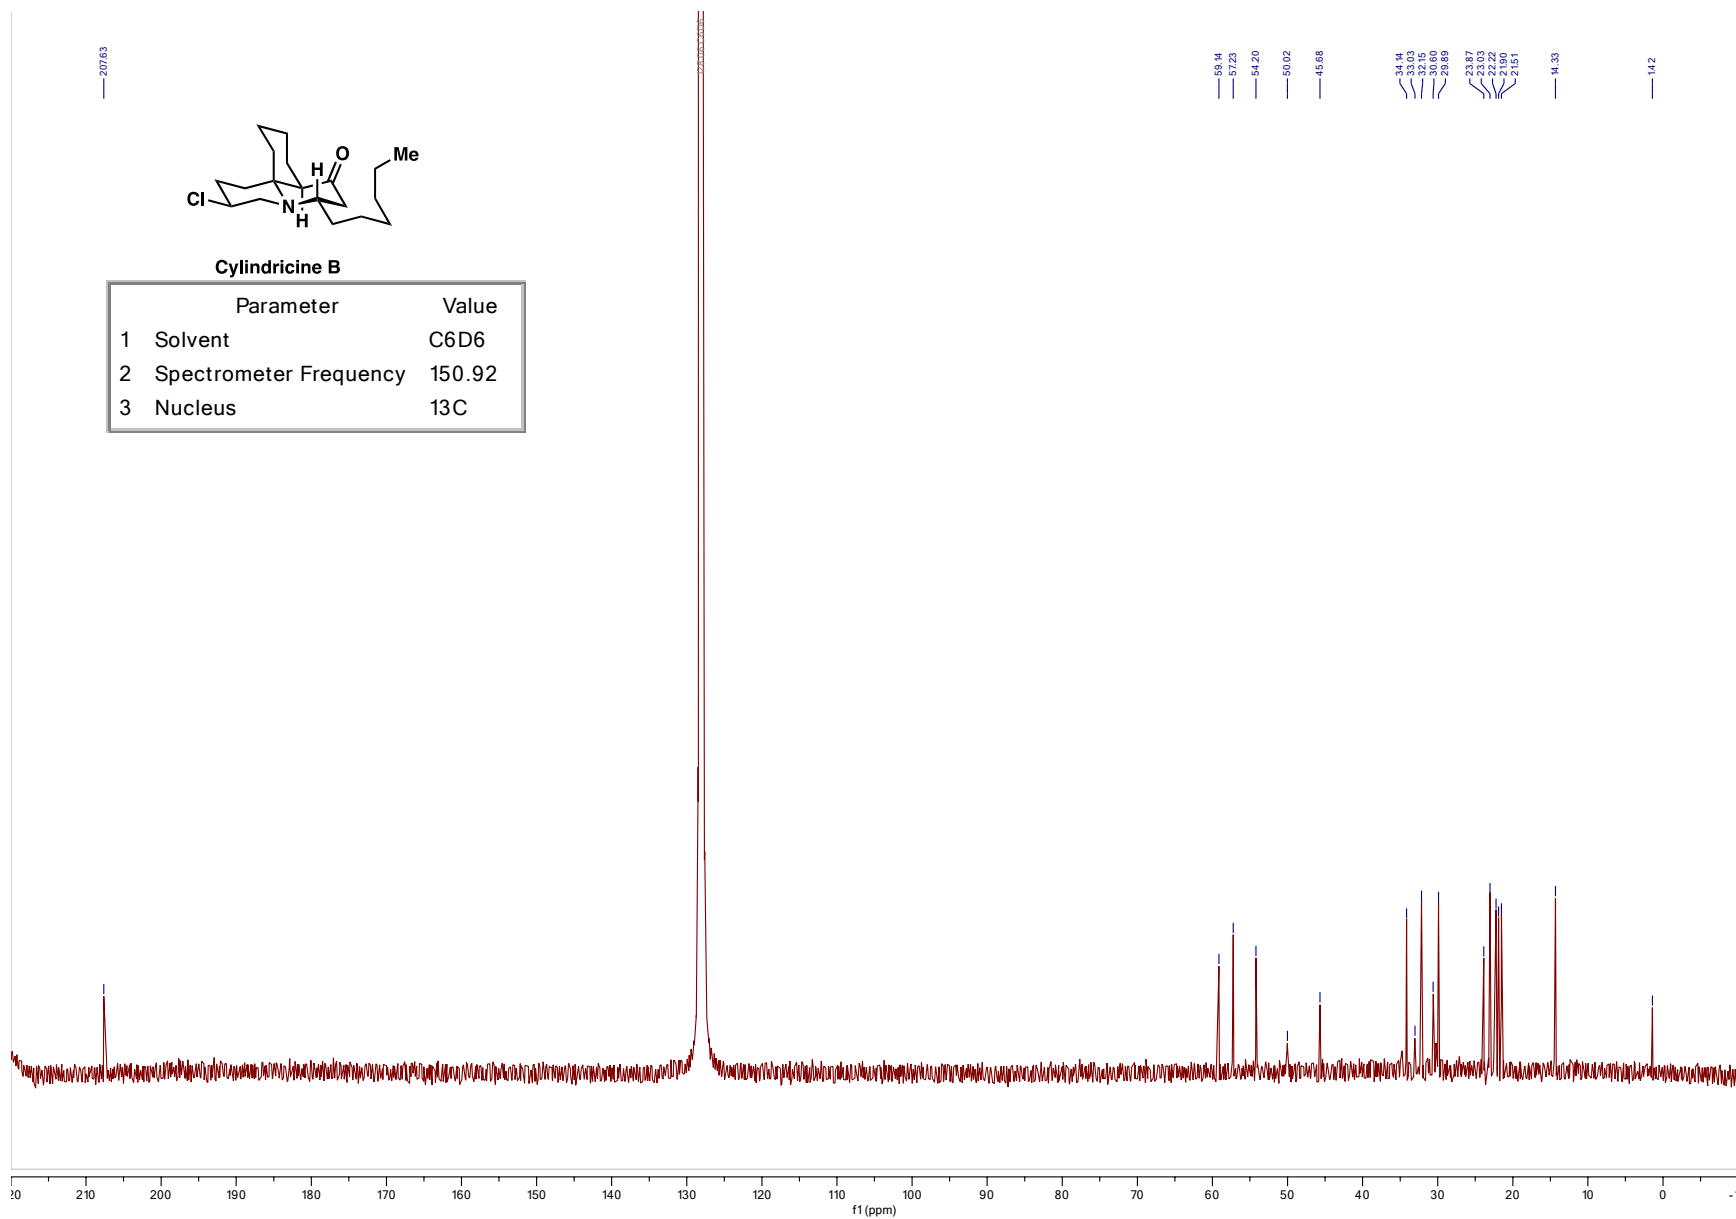

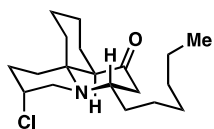

***epi*-Cylindricine B**

| Parameter                | Value          |
|--------------------------|----------------|
| 1 Solvent                | C6D6           |
| 2 Spectrometer Frequency | 600.13         |
| 3 Nucleus                | <sup>1</sup> H |

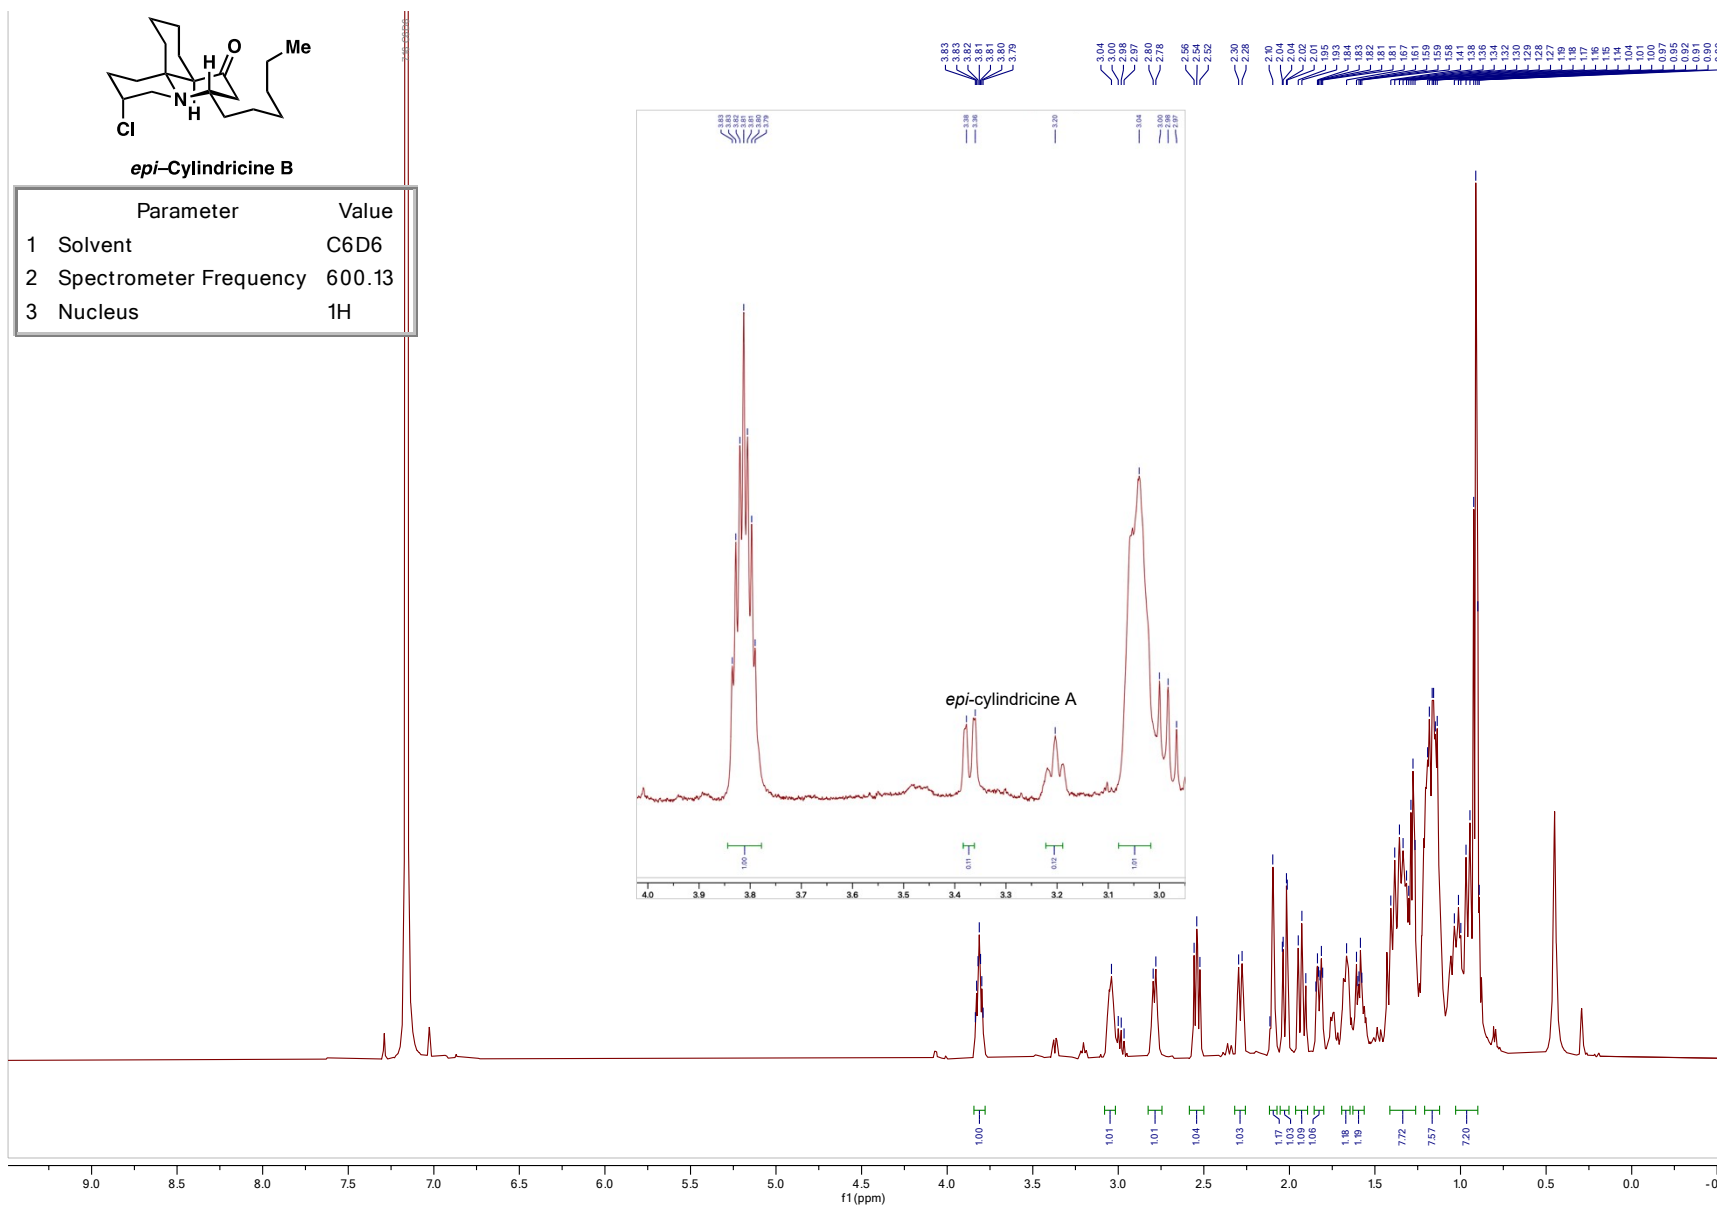

207.67

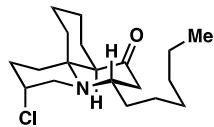

*epi*-Cylindricine B

| Parameter                | Value  |
|--------------------------|--------|
| 1 Solvent                | C6D6   |
| 2 Spectrometer Frequency | 150.92 |
| 3 Nucleus                | 13C    |

58.99  
57.27  
53.32  
47.72  
42.96  
33.69  
32.16  
32.00  
29.69  
25.54  
23.04  
22.76  
21.38  
14.32

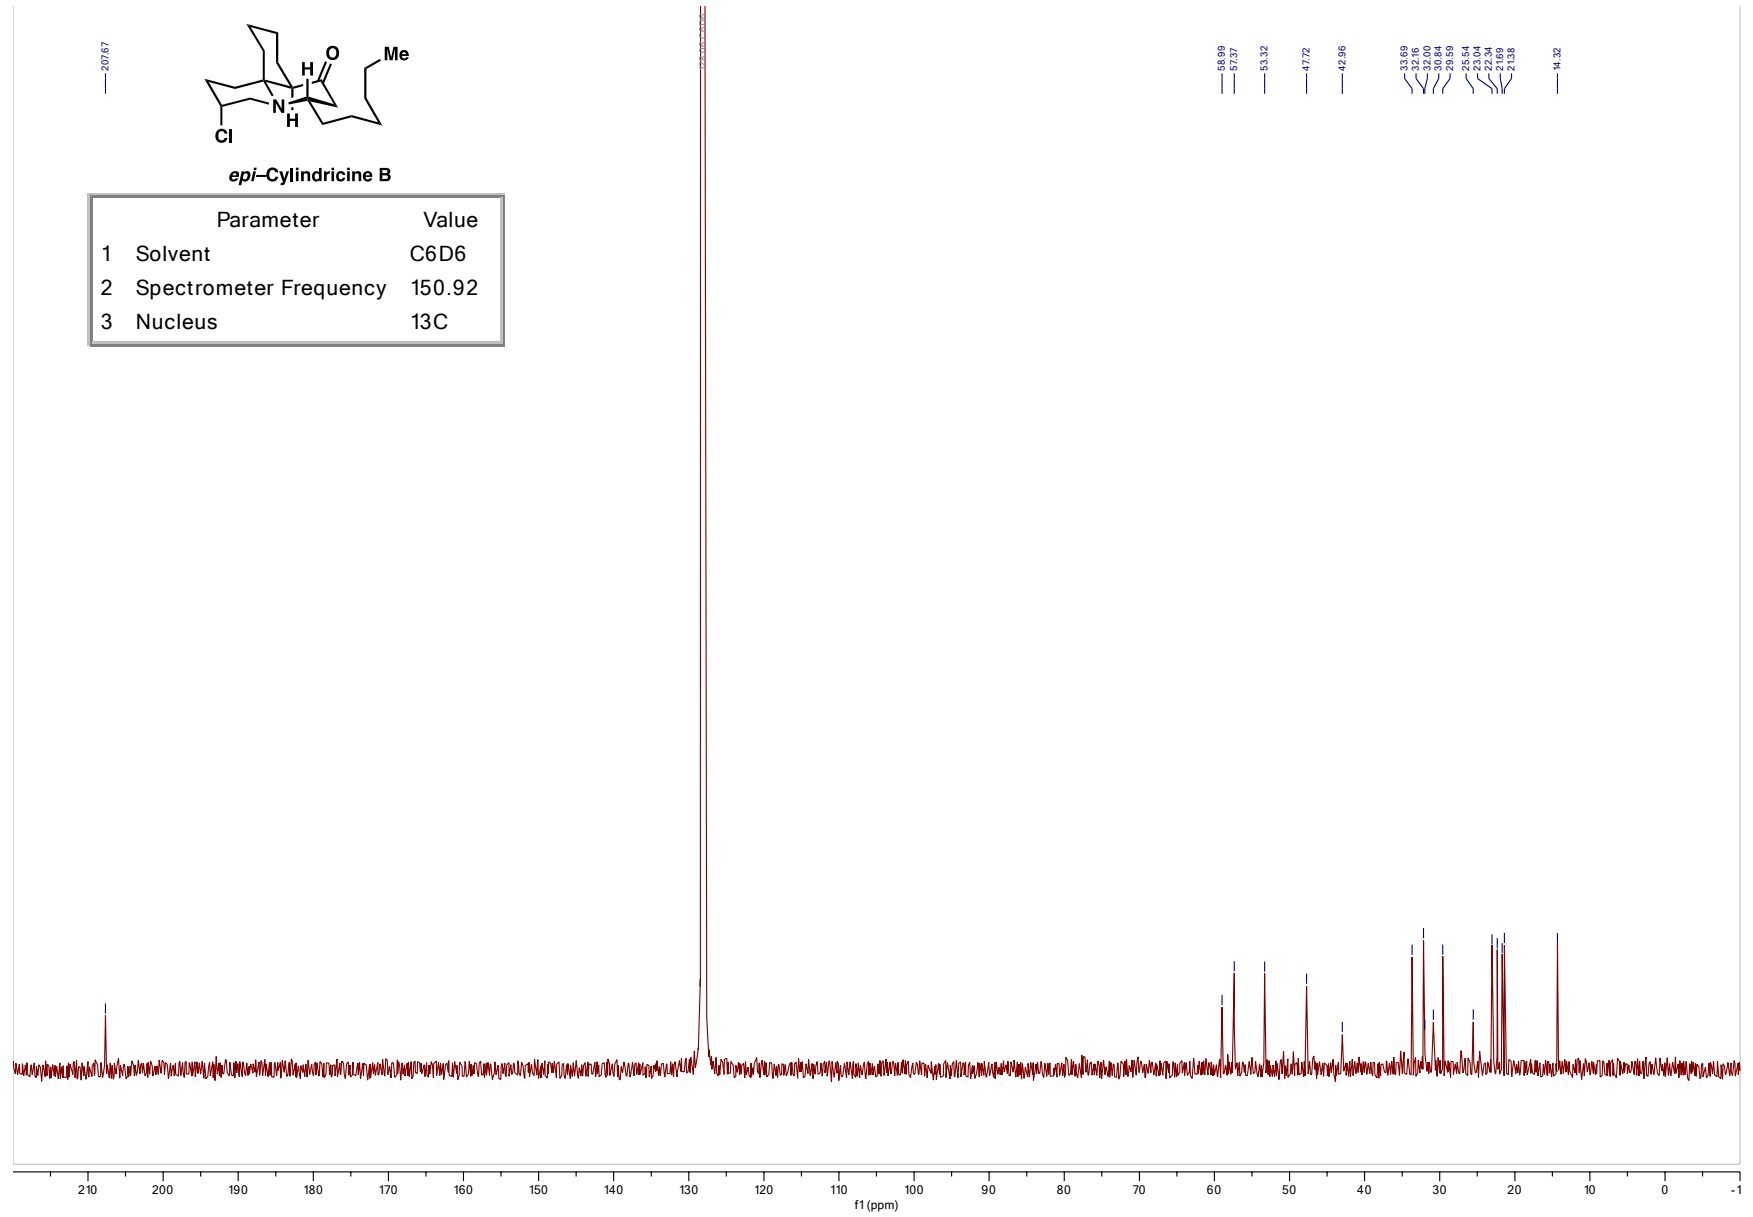

Supplement: d4sc04910a1.pdf [file d4sc04910a1.pdf]
